# Supplementary material
Source: PubMed Central journal article supplement (PMC4943336)

# Supporting Information

## A Modular, One-pot, Sequential Aziridine Ring Opening–S<sub>N</sub>Ar Strategy

### to 7-, 10- and 11-membered Benzofused Sultams

Joanna K. Loh, Naeem Asad, Thiwanka B. Samarakoon, and Paul. R. Hanson\*

*Department of Chemistry, University of Kansas, 1251 Wescoe Hall Drive, Lawrence, KS 66045-7582 and the Center for Chemical Methodologies and Library Development at the University of Kansas (KU-CMLD), 2034 Becker Drive, Shankel Structural Biology Center, Lawrence, Kansas 66047.*

phanson@ku.edu

### Table of Contents

|                                                                                                  |            |
|--------------------------------------------------------------------------------------------------|------------|
| Table of Optimization of Reaction Conditions                                                     | SI-2       |
| <sup>19</sup> F NMR Spectra for Compounds A, B and C                                             | SI-3       |
| <sup>1</sup> H, <sup>13</sup> C NMR Spectra and Crystallographic Data for All Relevant Compounds | SI-4–SI-55 |

**Table 1.** Optimization of reaction conditions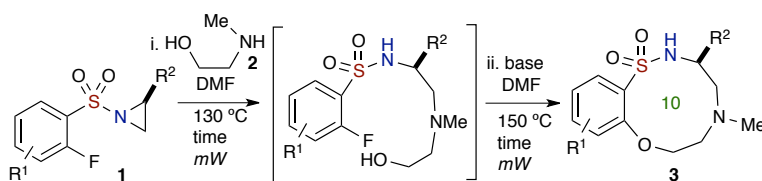

| entry <sup>h</sup> | R <sup>1</sup> , R <sup>2</sup> | conc<br>(i to ii M) | time<br>(i, ii mins)  | base                            | yield (%) <sup>a</sup> |
|--------------------|---------------------------------|---------------------|-----------------------|---------------------------------|------------------------|
| 1                  | F, <sup>i</sup> Bu              | 1.0 to 0.3          | 20, 60                | Cs <sub>2</sub> CO <sub>3</sub> | 23 <sup>b</sup>        |
| 2                  | F, <sup>i</sup> Bu              | 0.8 to 0.3          | 20, 60                | Cs <sub>2</sub> CO <sub>3</sub> | 43 <sup>b</sup>        |
| 3                  | F, <sup>i</sup> Bu              | 0.5 to 0.3          | 20, 60                | Cs <sub>2</sub> CO <sub>3</sub> | 40 <sup>b</sup>        |
| 4                  | F, <sup>i</sup> Bu              | 1.0 to 0.3          | 5 d <sup>c</sup> , 60 | Cs <sub>2</sub> CO <sub>3</sub> | 23                     |
| 5                  | F, <sup>i</sup> Pr              | 0.8 to 0.3          | 20, 60                | CsF                             | 3 <sup>d</sup>         |
| 6                  | F, <sup>i</sup> Pr              | 0.8 to 0.3          | 20, 60                | K <sub>2</sub> CO <sub>3</sub>  | 18 <sup>e</sup>        |
| 7                  | F, <sup>i</sup> Pr              | 0.8 to 0.3          | 20, 60                | K <sub>3</sub> PO <sub>4</sub>  | 11 <sup>d</sup>        |
| 8                  | F, <sup>i</sup> Pr              | 0.8 to 0.3          | 20, 60                | DBU                             | 4 <sup>f</sup>         |
| 9                  | F, <sup>i</sup> Pr              | 0.8 to 0.3          | 20, 60                | NaH                             | 11 <sup>g</sup>        |

<sup>a</sup>Final isolated yield over 2 reactions after flash chromatography. <sup>b</sup>**Aziridine-opening:** **1** (1.0 equiv) and **2** (1.05–1.3 equiv) in DMF at 130 °C. **S<sub>N</sub>Ar:** Cs<sub>2</sub>CO<sub>3</sub> (2.5 equiv) in DMF at 150 °C. <sup>c</sup>Aziridine-opening: reaction stirred at rt for 5 days. <sup>d</sup>CsF or K<sub>3</sub>PO<sub>4</sub> (2.0 equiv). <sup>e</sup>K<sub>2</sub>CO<sub>3</sub> (3.0 equiv). <sup>f</sup>DBU (0.3 equiv). <sup>g</sup>NaH (2.2 equiv). <sup>h</sup>Reactions were monitored by TLC.

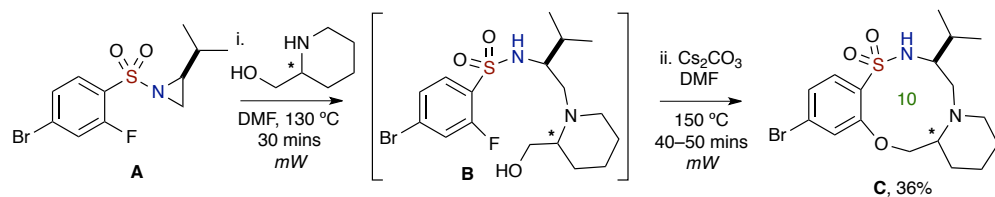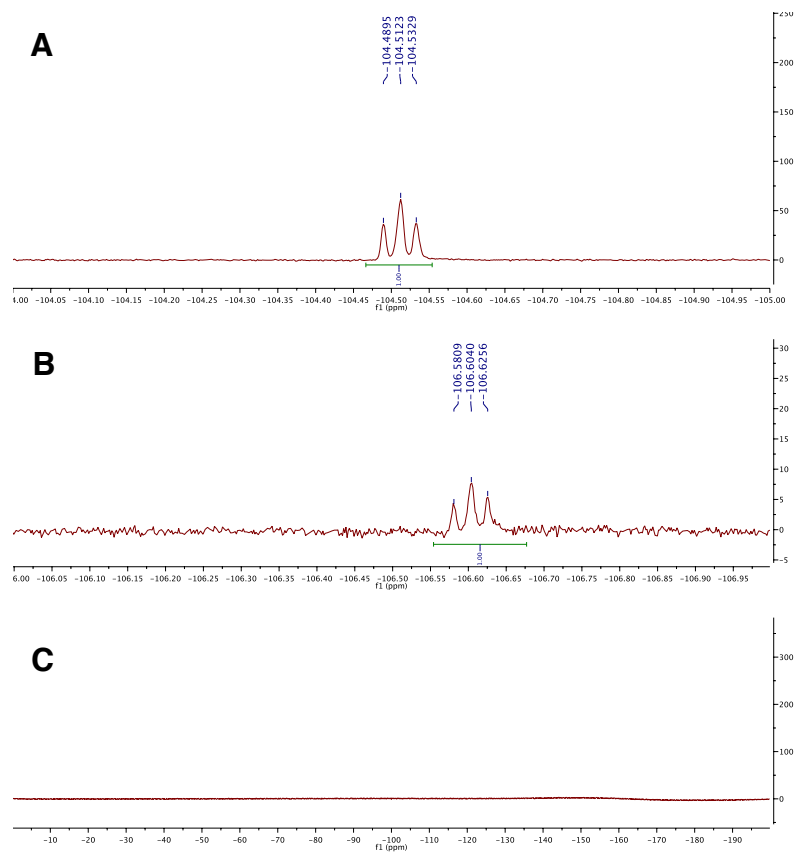

**Figure 1.** <sup>19</sup>F NMR studies: comparison between sulfonamide **A**, ring opened **B** and product **C**.

**(S)-1-((4-bromo-2-fluorophenyl)sulfonyl)-2-isopropylaziridine (4b)**

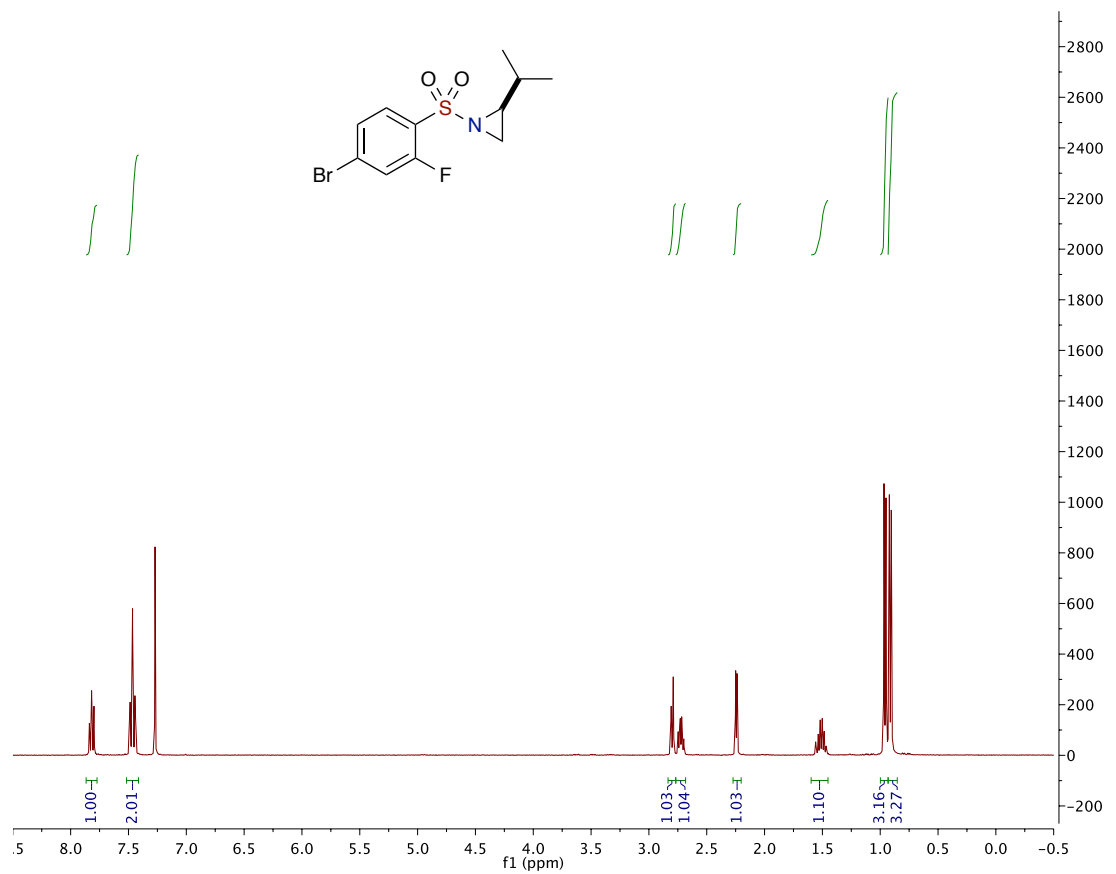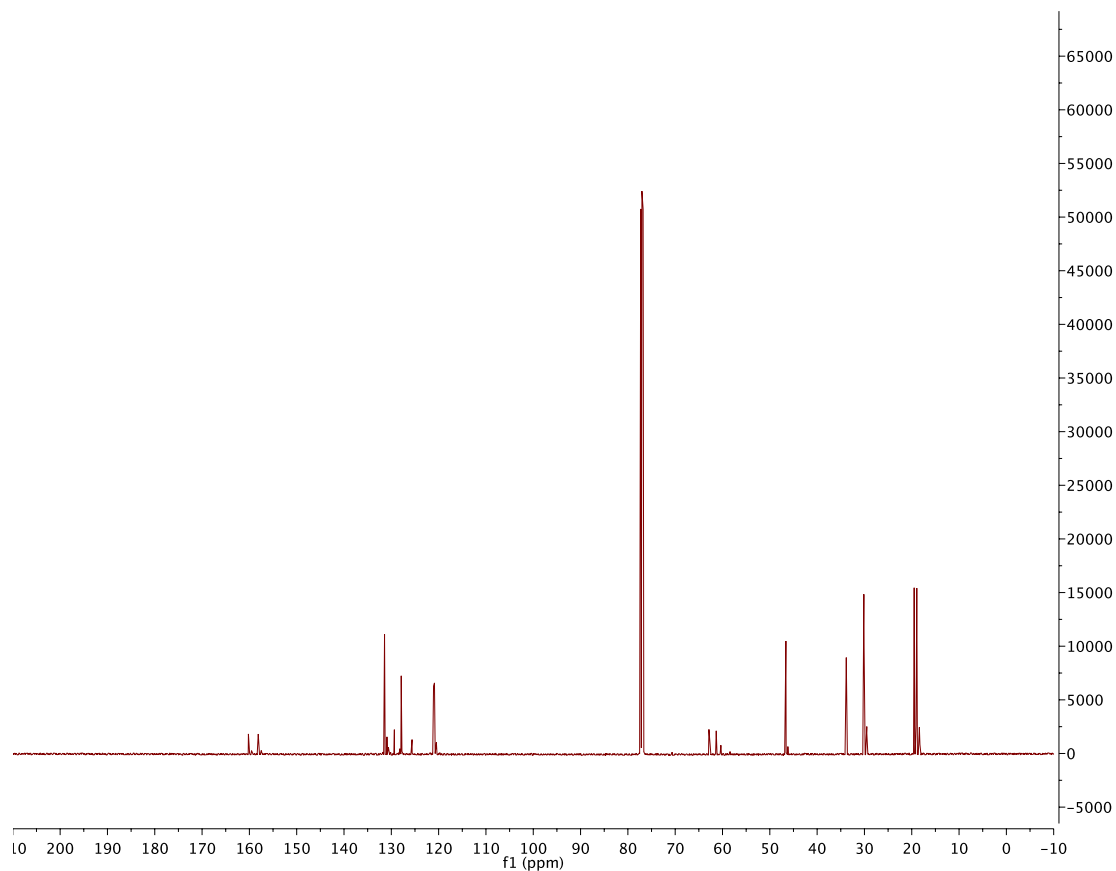

**(S)-1-((2,4-difluorophenyl)sulfonyl)-2-isopropylaziridine (4d)**

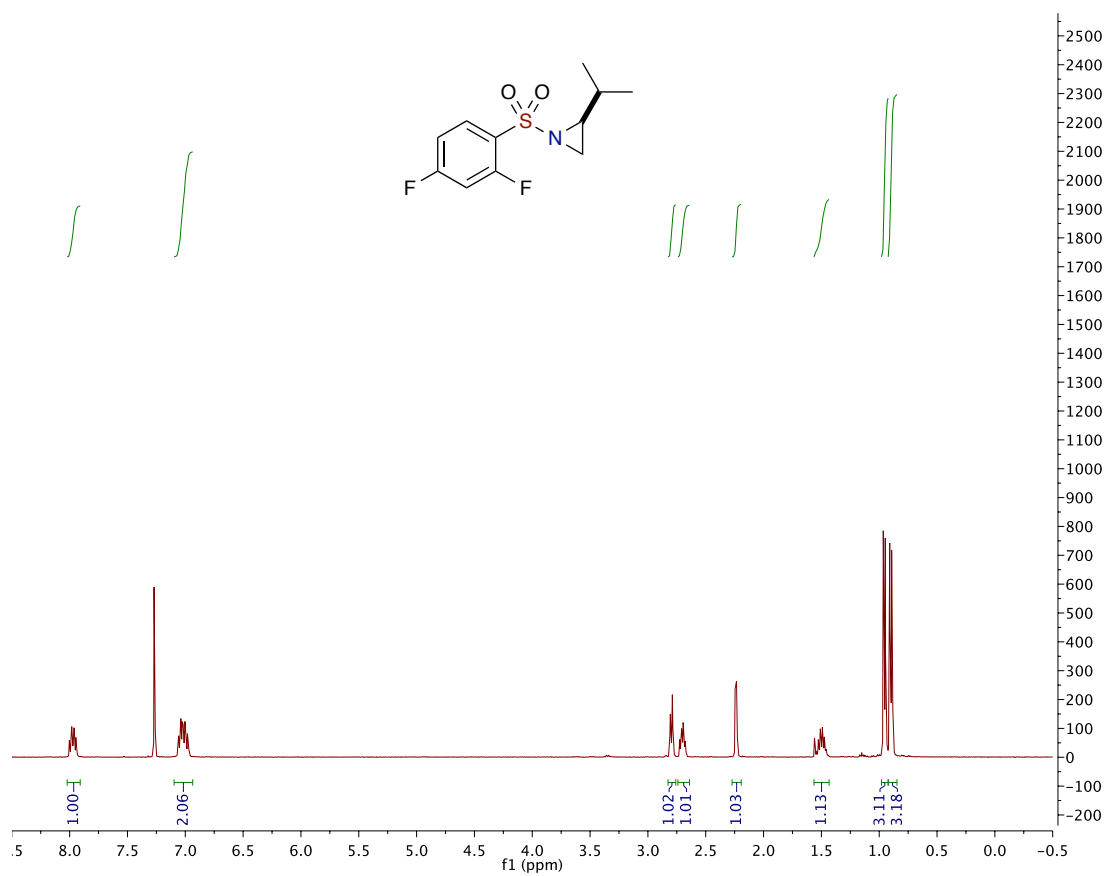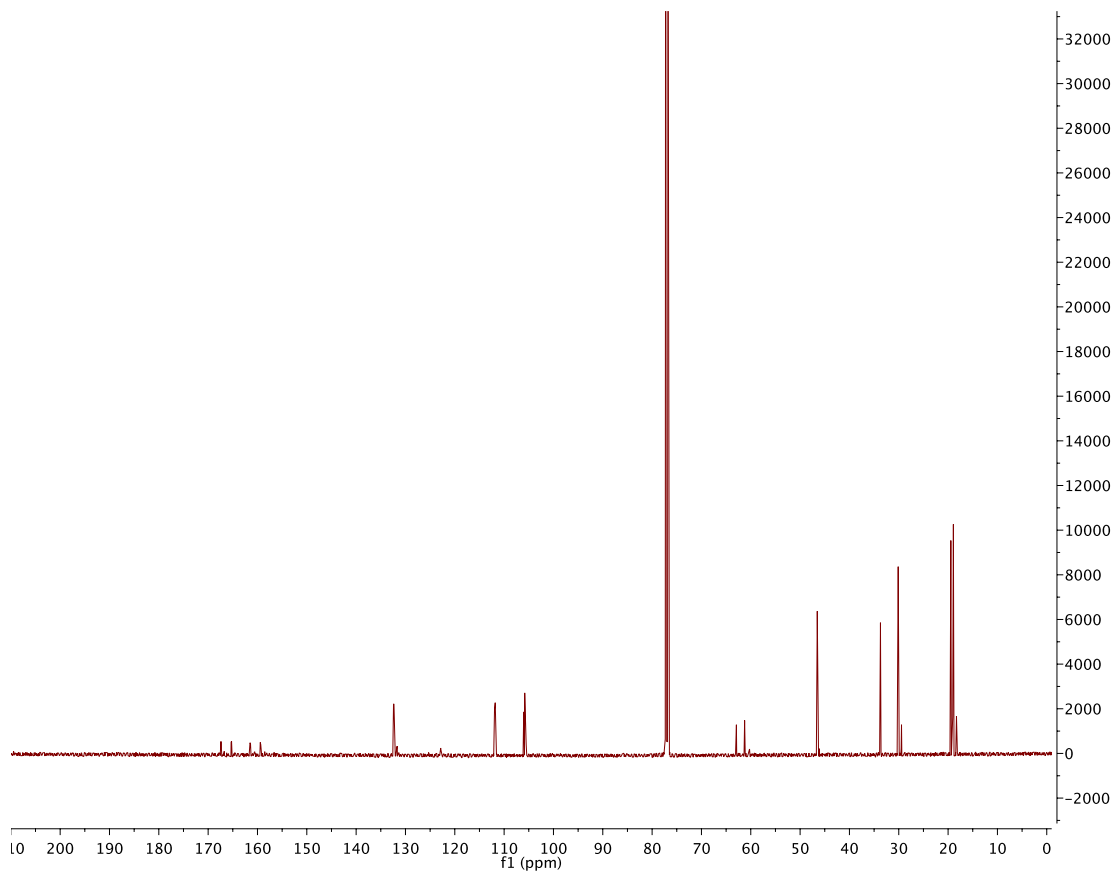

**(S)-10-bromo-3-isobutyl-5-methyl-2,3,4,5,6,7-hexahydrobenzo[*b*][1,4,5,8]oxathiadiazecine 1,1-dioxide (6a)**

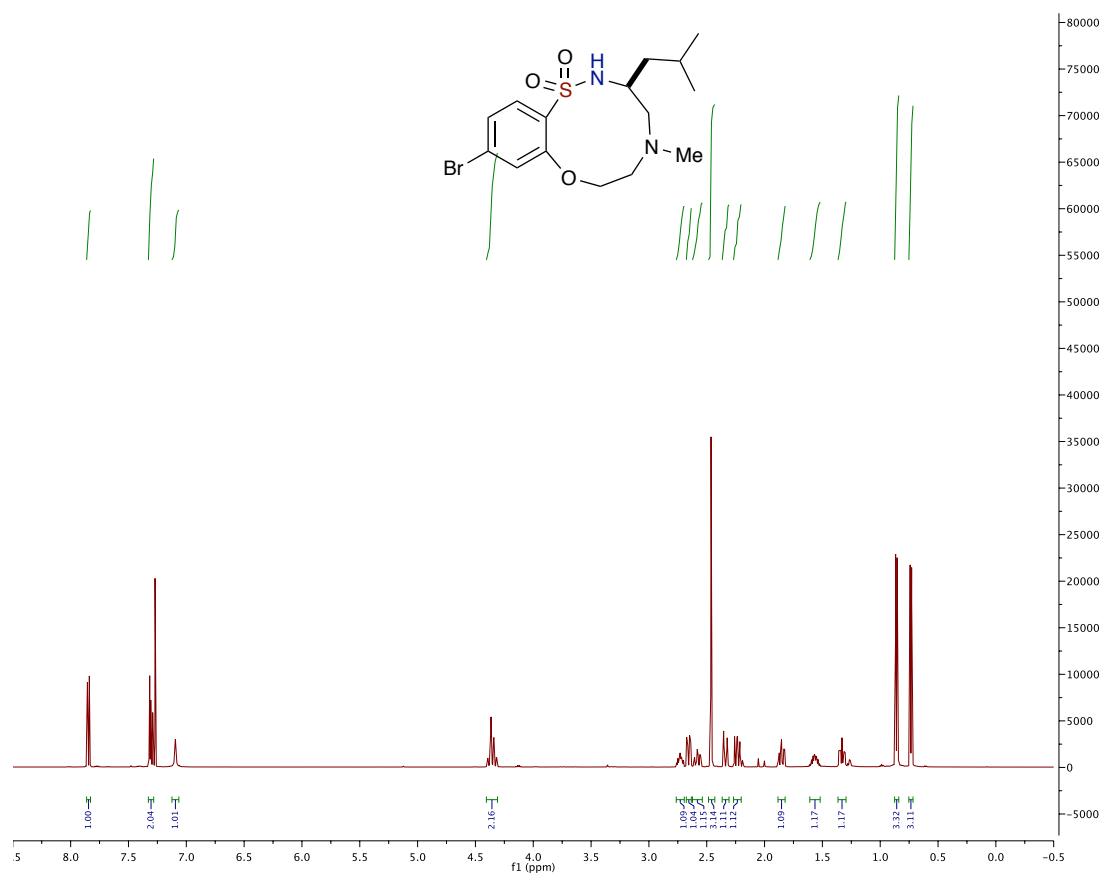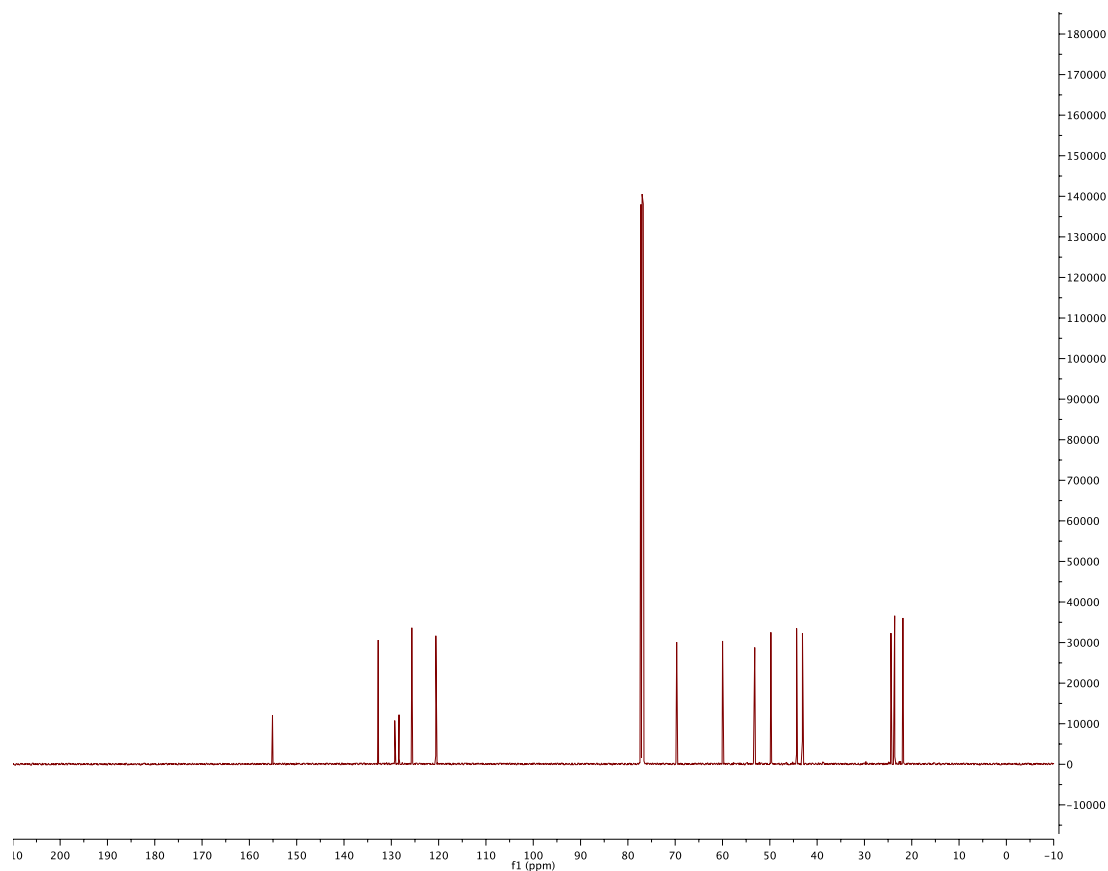

**Figure 1.** X-ray crystal structure of sultam **6a** where the thermal ellipsoids are set at a 50% probability level.

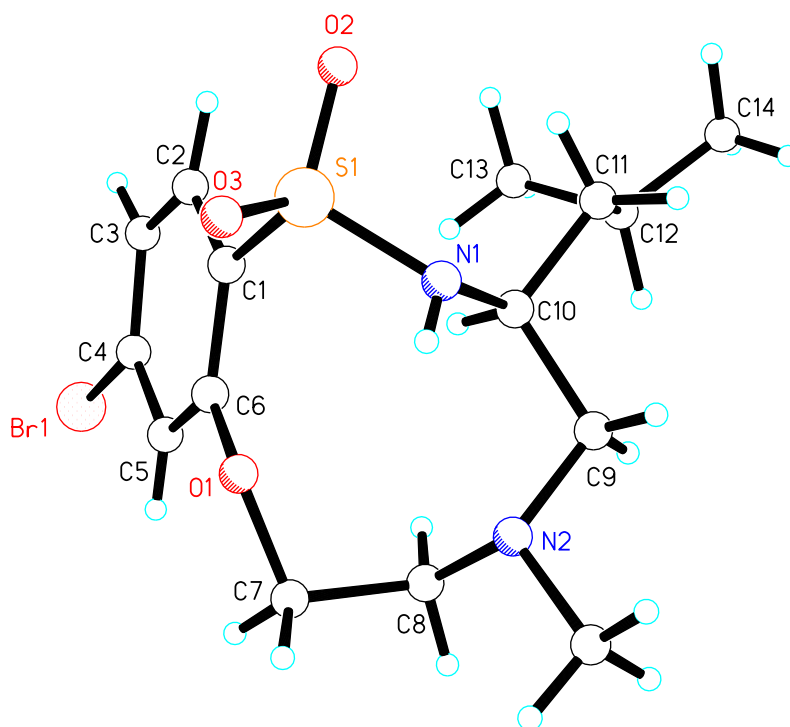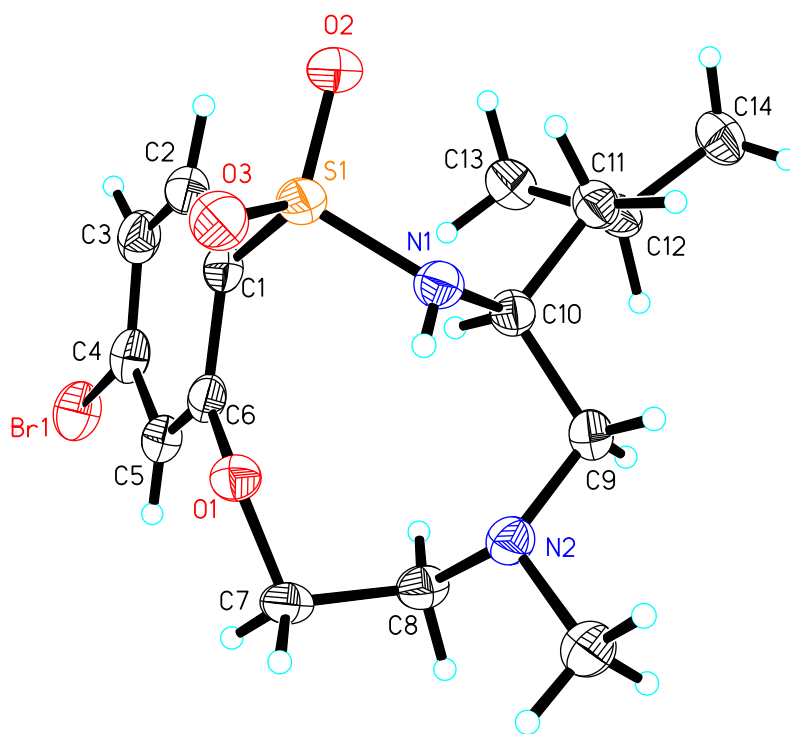

**(S)-10-bromo-3-isopropyl-5-methyl-2,3,4,5,6,7-hexahydrobenzo[*b*][1,4,5,8]oxathiadiazecine-1,1-dioxide (6b)**

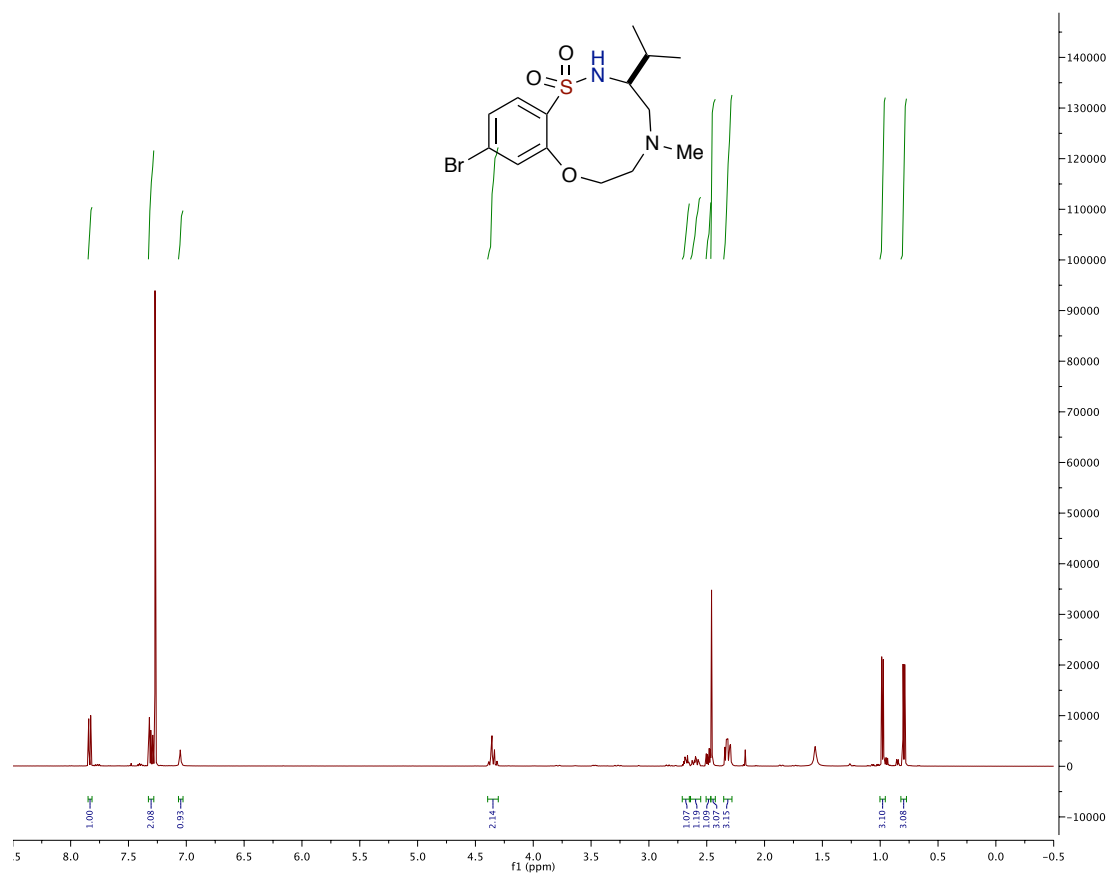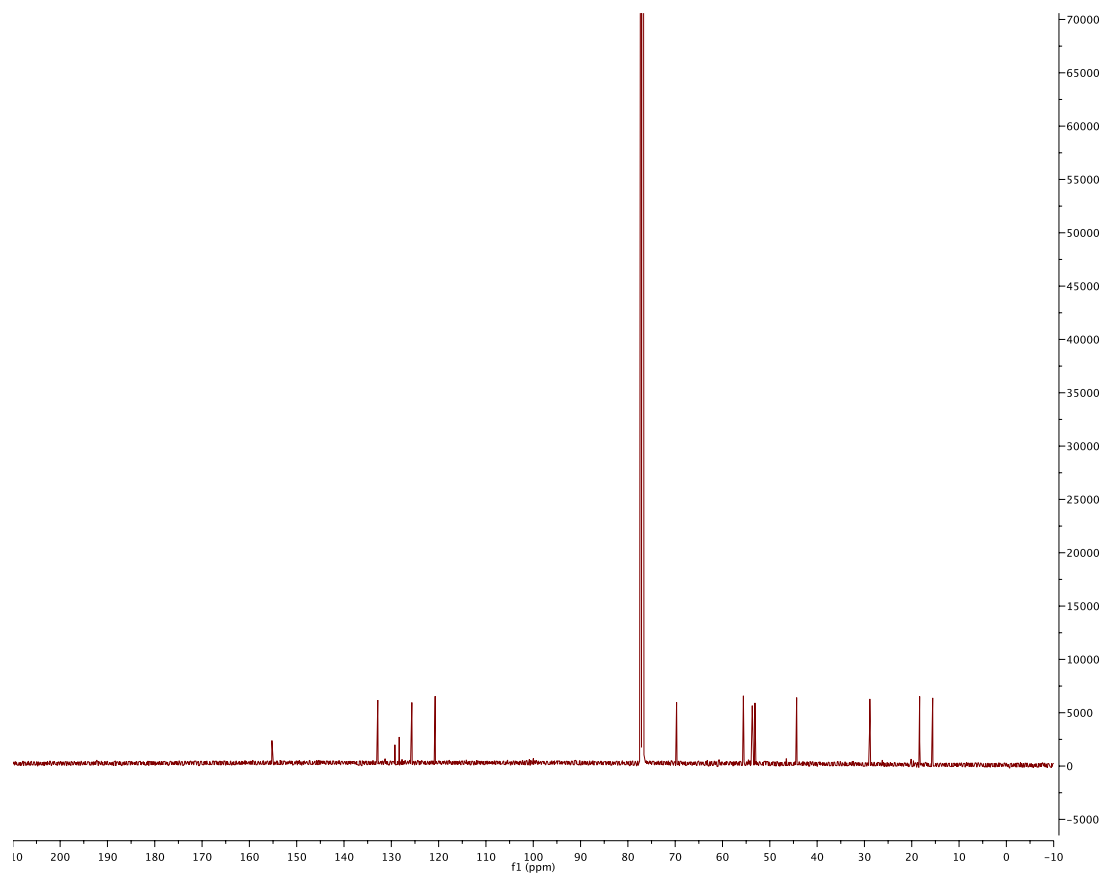



**(S)-10-fluoro-3-isobutyl-5-methyl-2,3,4,5,6,7-hexahydrobenzo[*b*][1,4,5,8]oxathiadiazecine 1,1-dioxide (6c)**

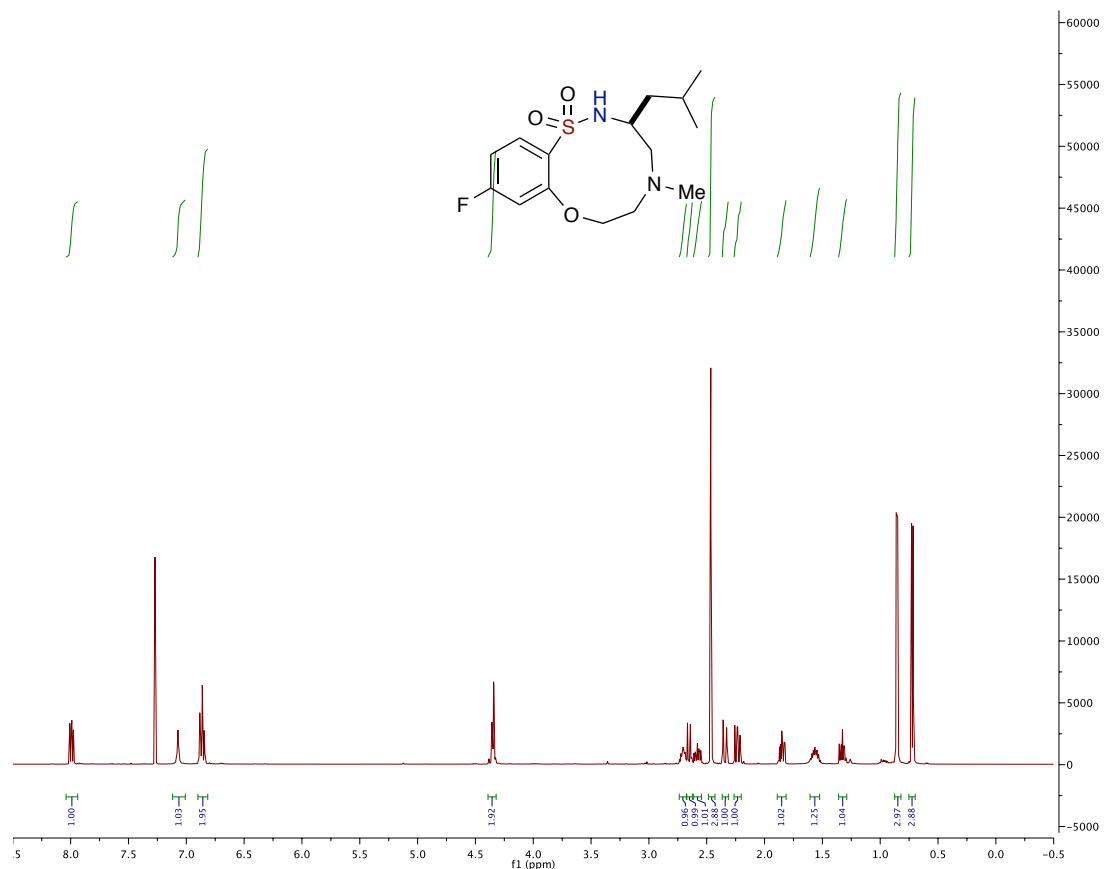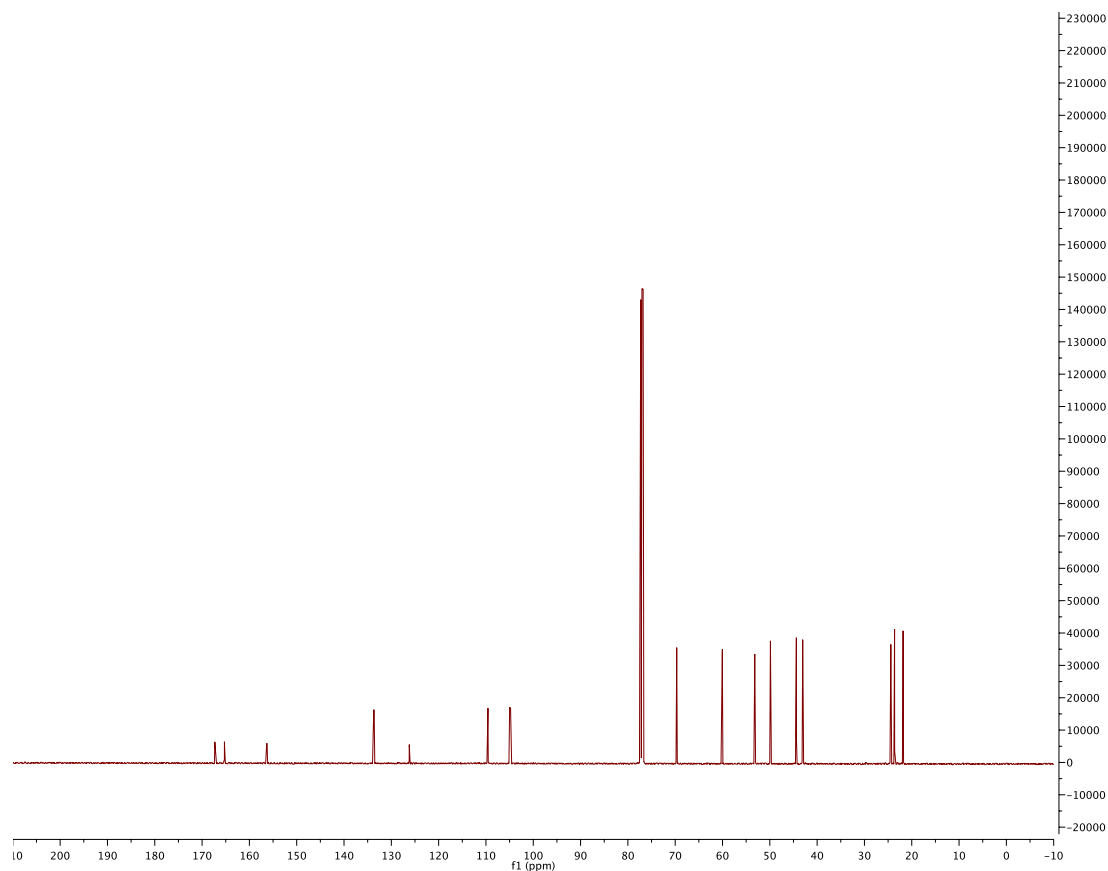

**(S)-10-fluoro-3-isopropyl-5-methyl-2,3,4,5,6,7-hexahydrobenzo[*b*][1,4,5,8]oxathiadiazecine-1,1-dioxide (6d)**

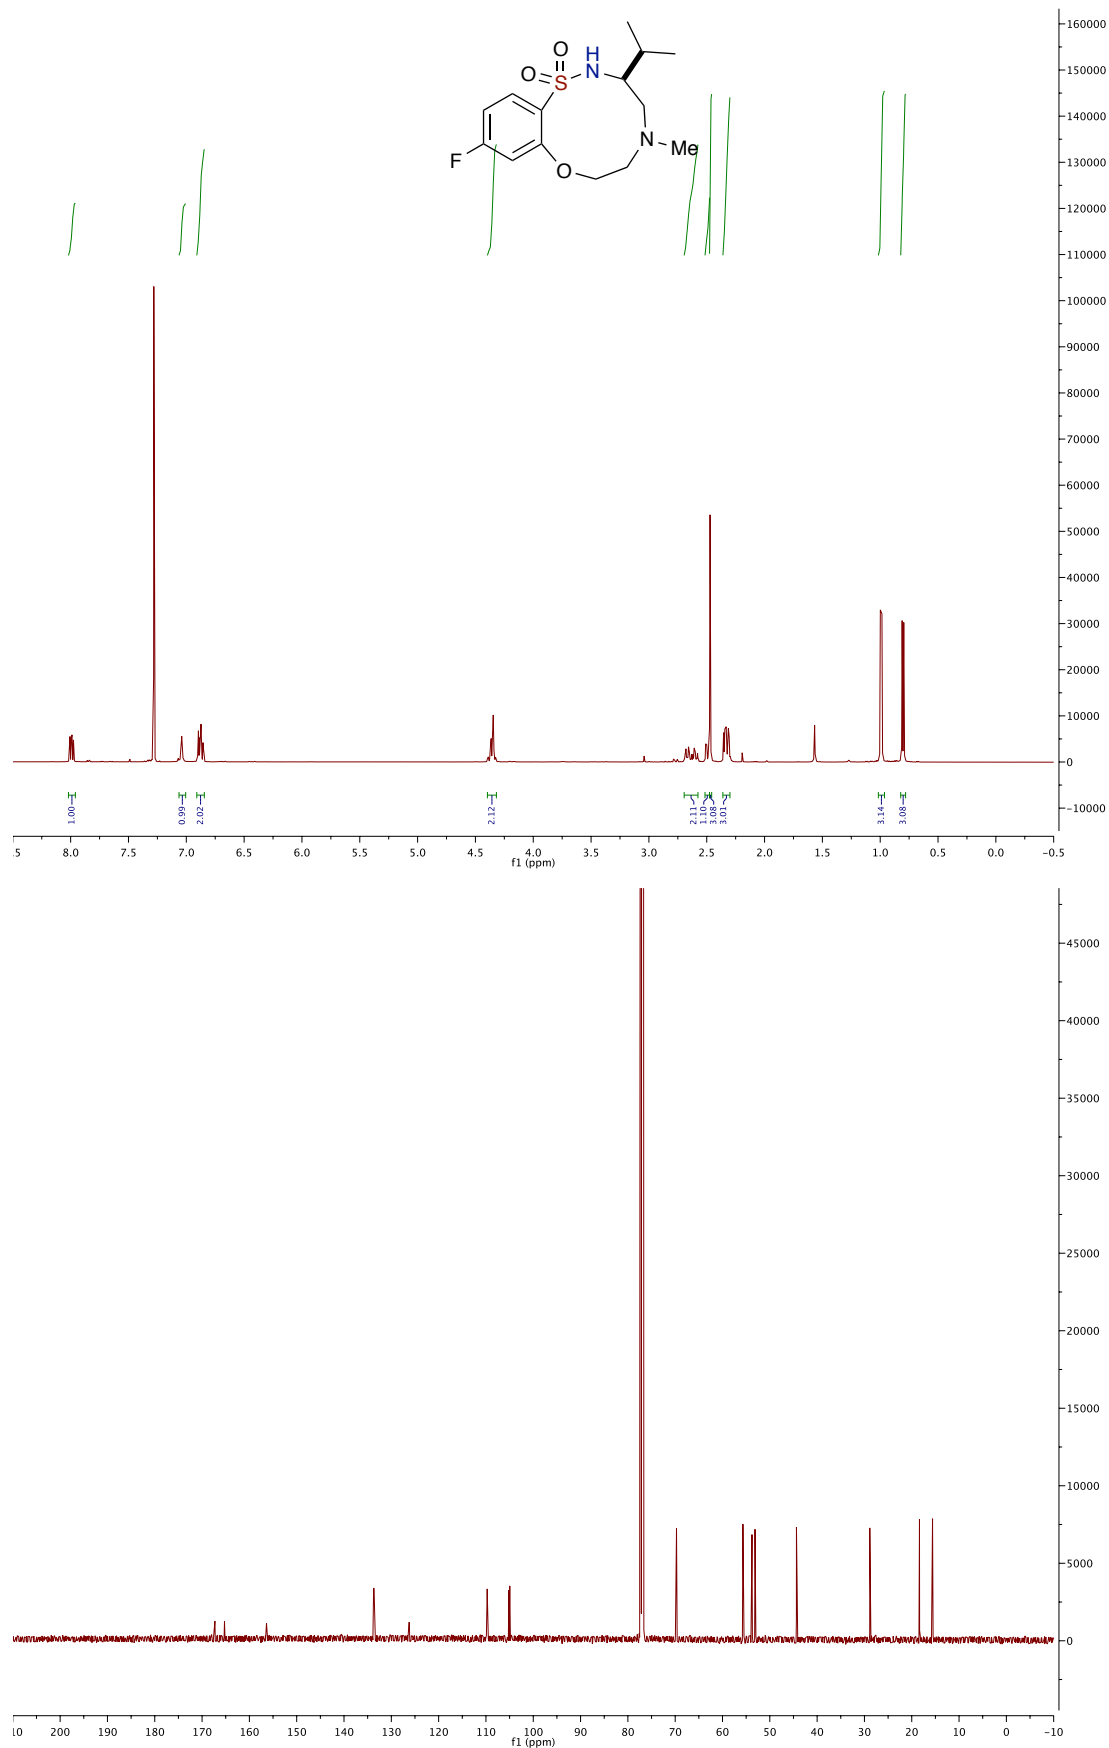

**(S)-11-chloro-3-isopropyl-5-methyl-2,3,4,5,6,7-hexahydrobenzo[*b*][1,4,5,8]oxathiadiazecine 1,1-dioxide (6e)**

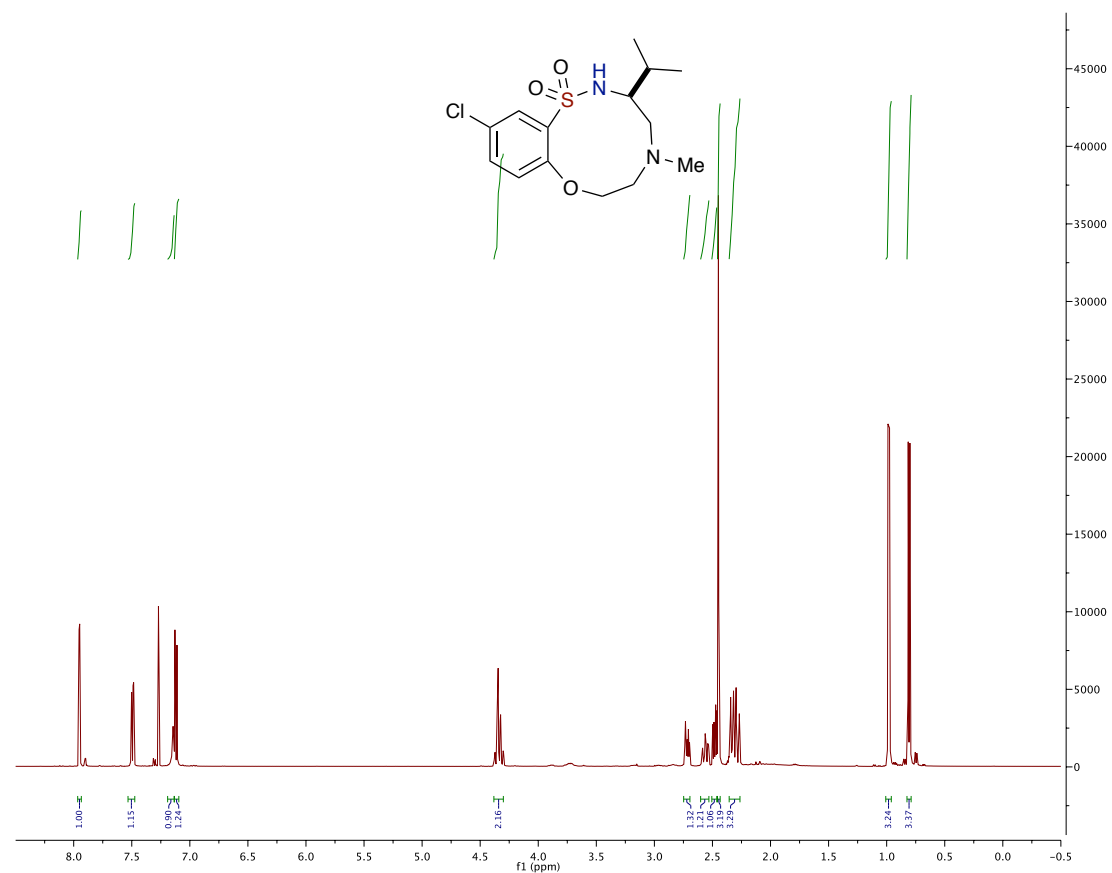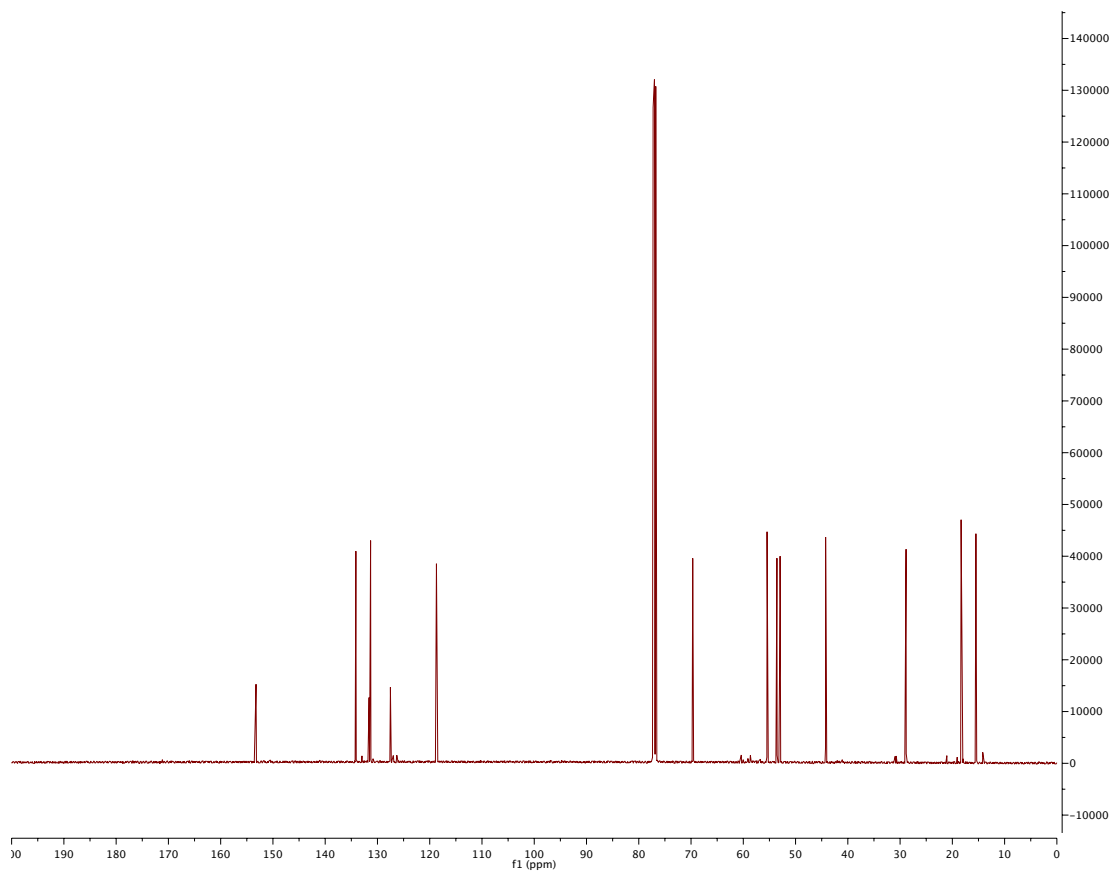

**(S)-3-((S)-*sec*-butyl)-11-chloro-5-methyl-2,3,4,5,6,7-hexahydrobenzo[*b*][1,4,5,8]oxathiadiazecine 1,1-dioxide (6f)**

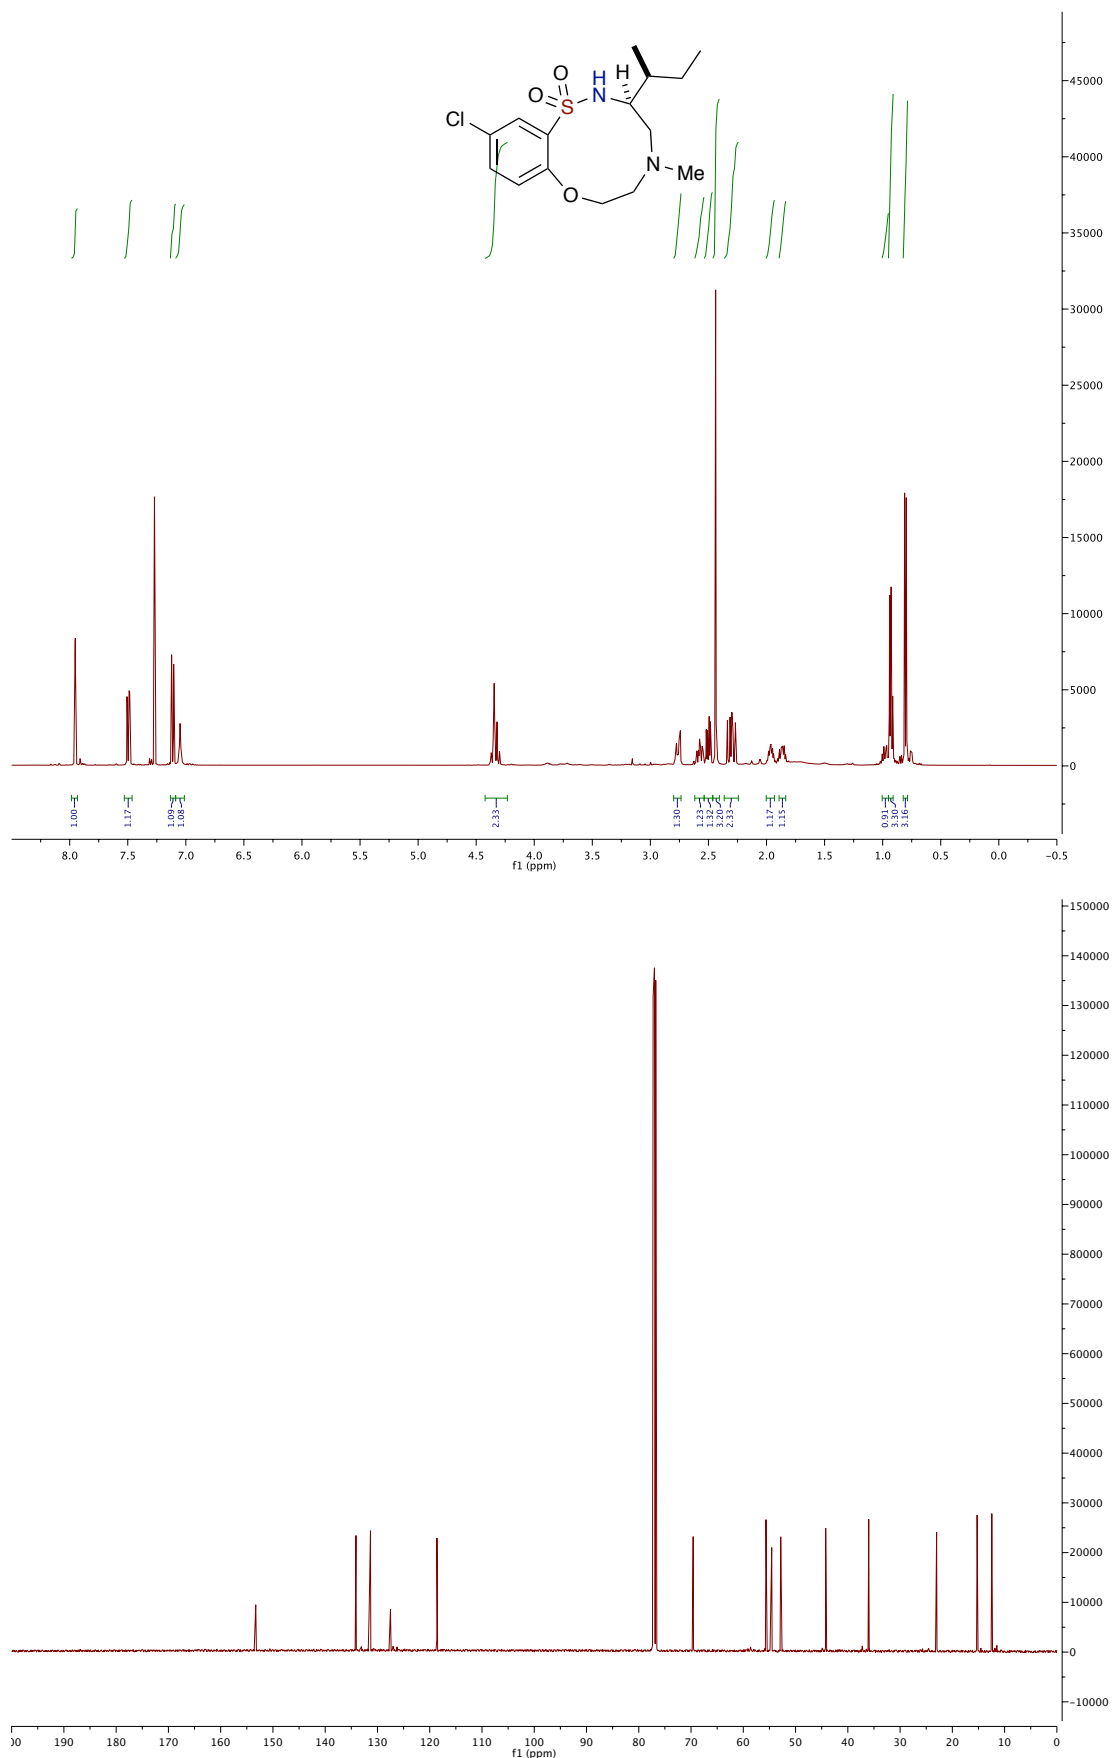

**12-fluoro-5-methyl-4,5,6,7-tetrahydro-2H-spiro[benzo[*b*][1,4,5,8]oxathiadiazecine-3,1'-cyclohexane] 1,1-dioxide (6g)**

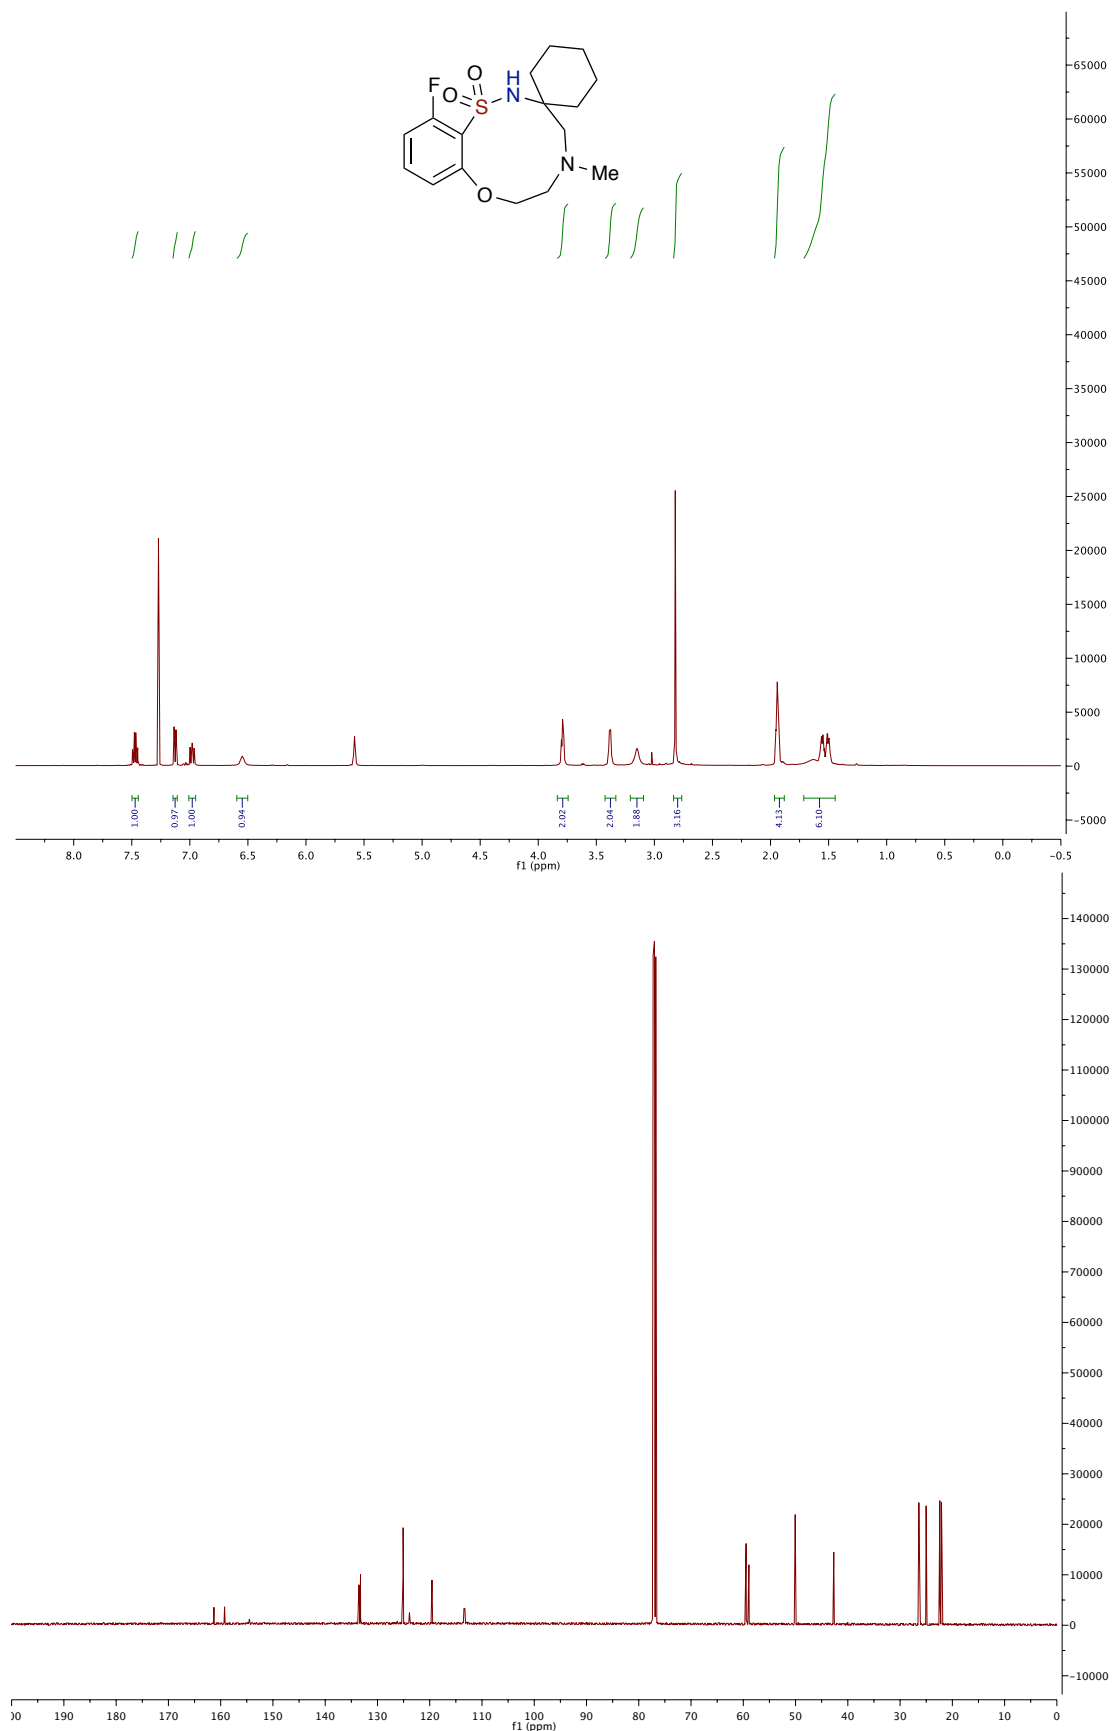

**(6*S*,14*aR*)-11-bromo-6-isobutyl-1,2,3,5,6,7,14,14a-octahydrobenzo[*b*]pyrrolo[1,2*h*][1,4,5,8]oxathiazine 8,8-dioxide (6h)**

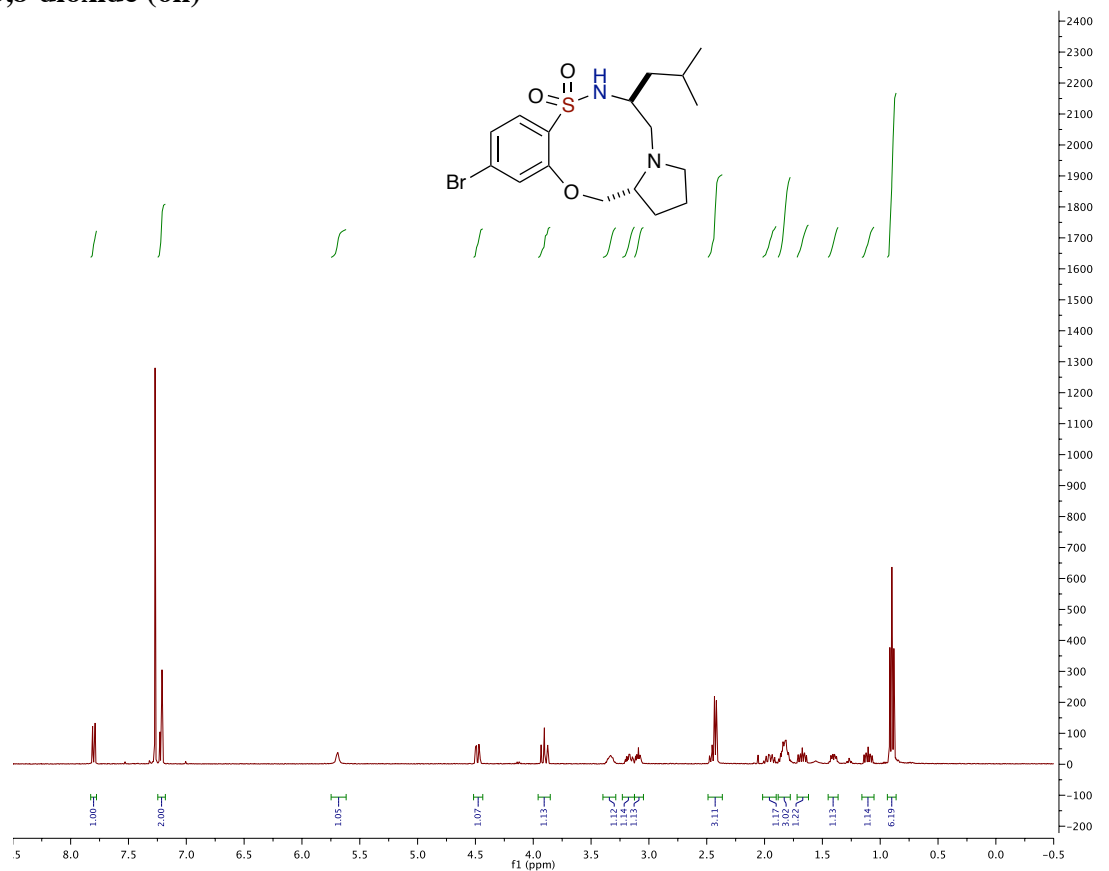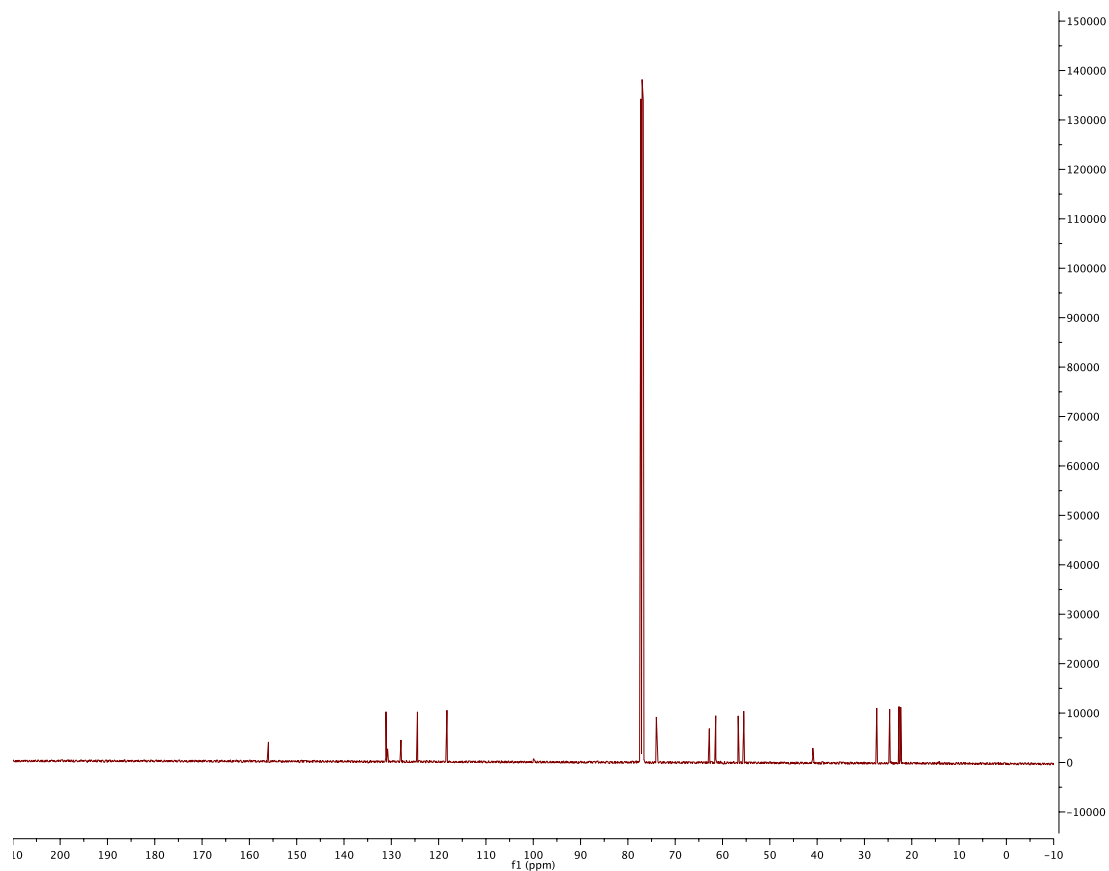

**(6*S*,14*aR*)-11-fluoro-6-isopropyl-1,2,3,5,6,7,14,14*a*-octahydrobenzo[*b*]pyrrolo[1,2*h*][1,4,5,8]oxathiazine 8,8-dioxide (6i)**

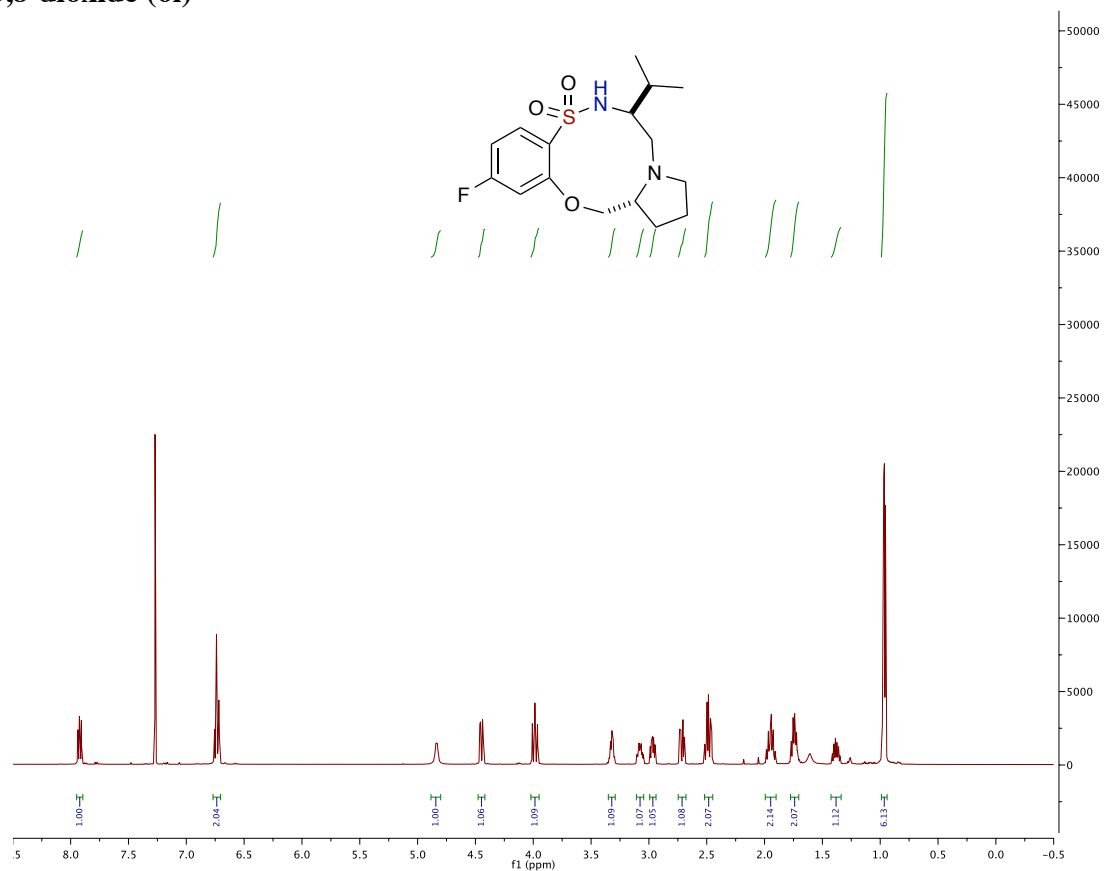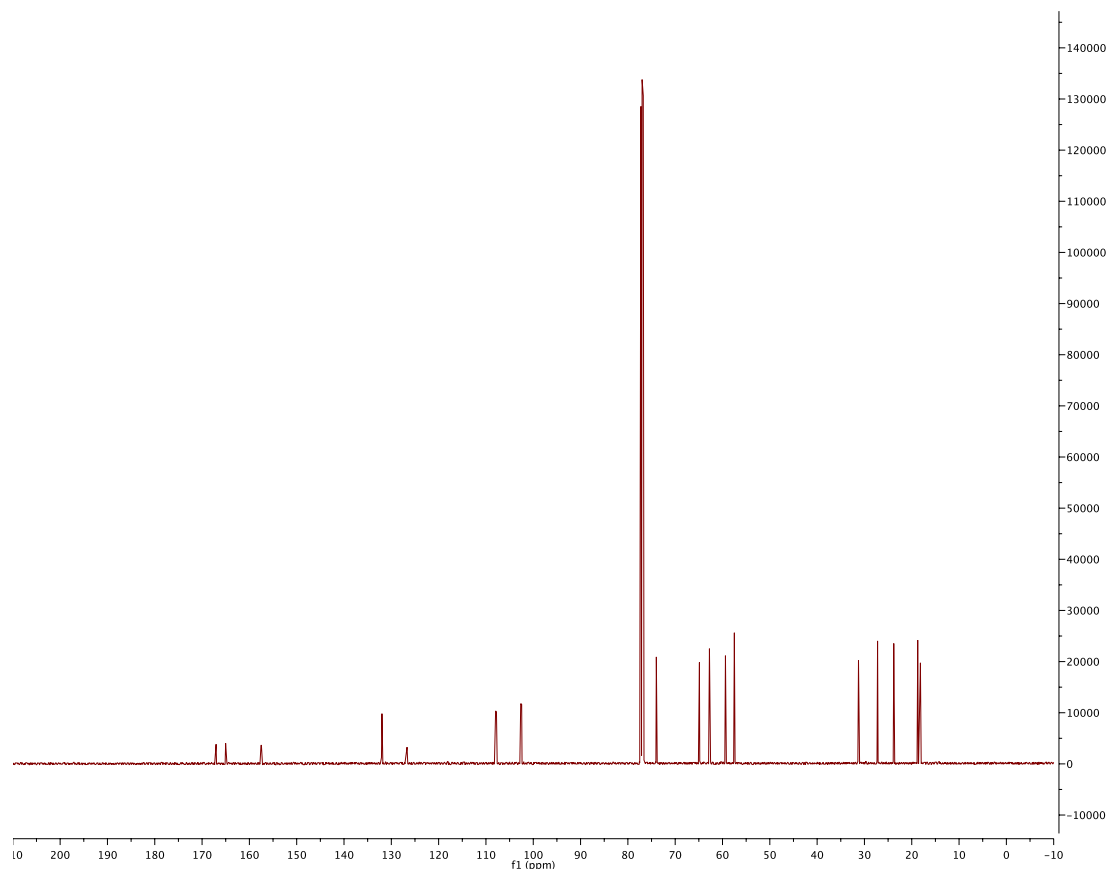

**(6*S*,14*aR*)-6-((*S*)-*sec*-butyl)-10-chloro-1,2,3,5,6,7,14,14*a*-octahydrobenzo[*b*]pyrrolo[1,2-*h*][1,4,5,8]oxathiazine 8,8-dioxide (6j)**

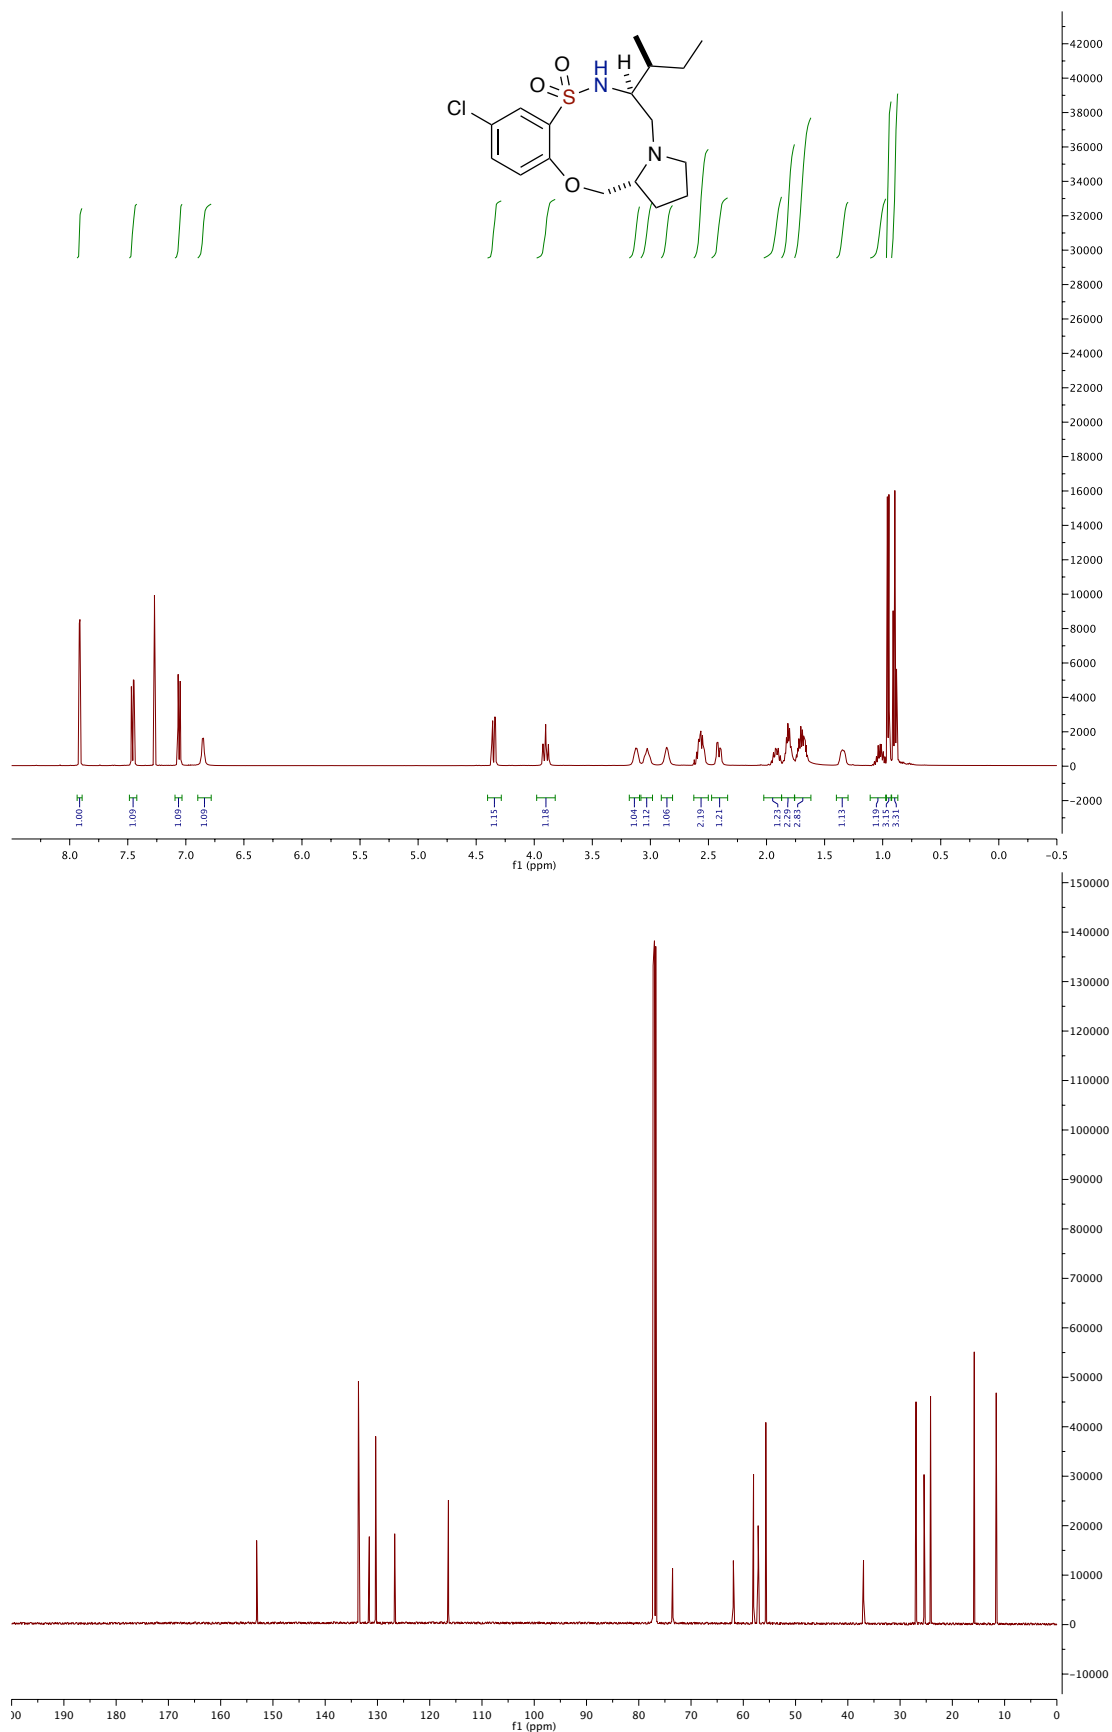



**(6*S*,14*aR*)-6-((*S*)-*sec*-butyl)-9-fluoro-1,2,3,5,6,7,14,14*a*-octahydrobenzo[*b*]pyrrolo[1,2-*h*][1,4,5,8]oxathiazine 8,8-dioxide (6k)**

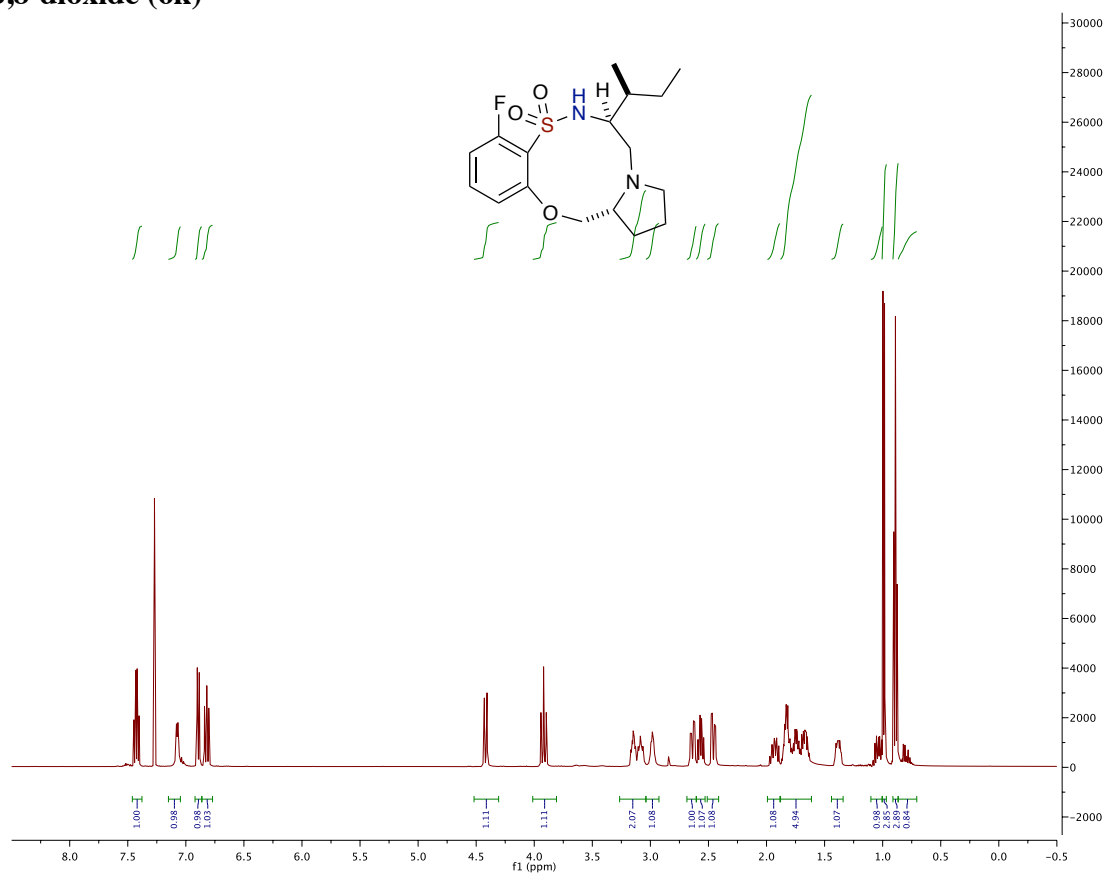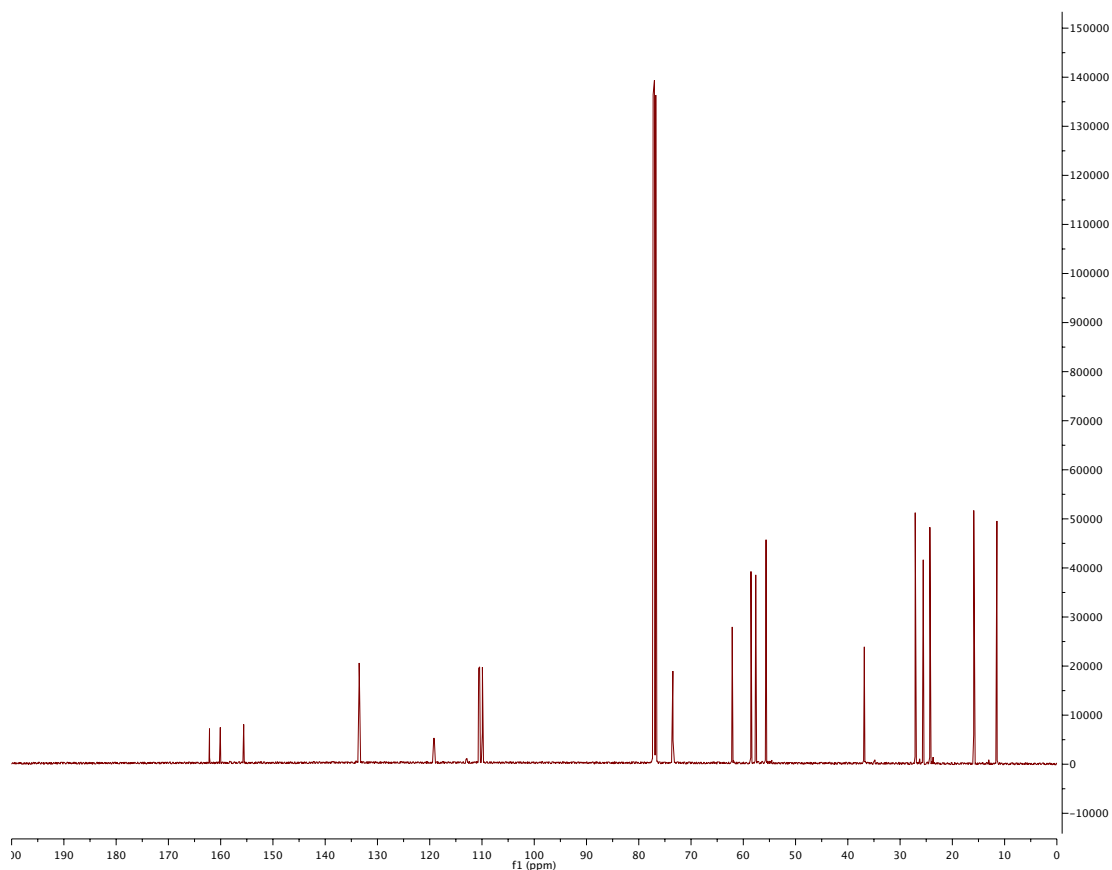

**(6*S*,14*aS*)-11-fluoro-6-isopropyl-1,2,3,5,6,7,14,14*a*-octahydrobenzo[*b*]pyrrolo[1,2-*h*][1,4,5,8]oxathiazine 8,8-dioxide (6l)**

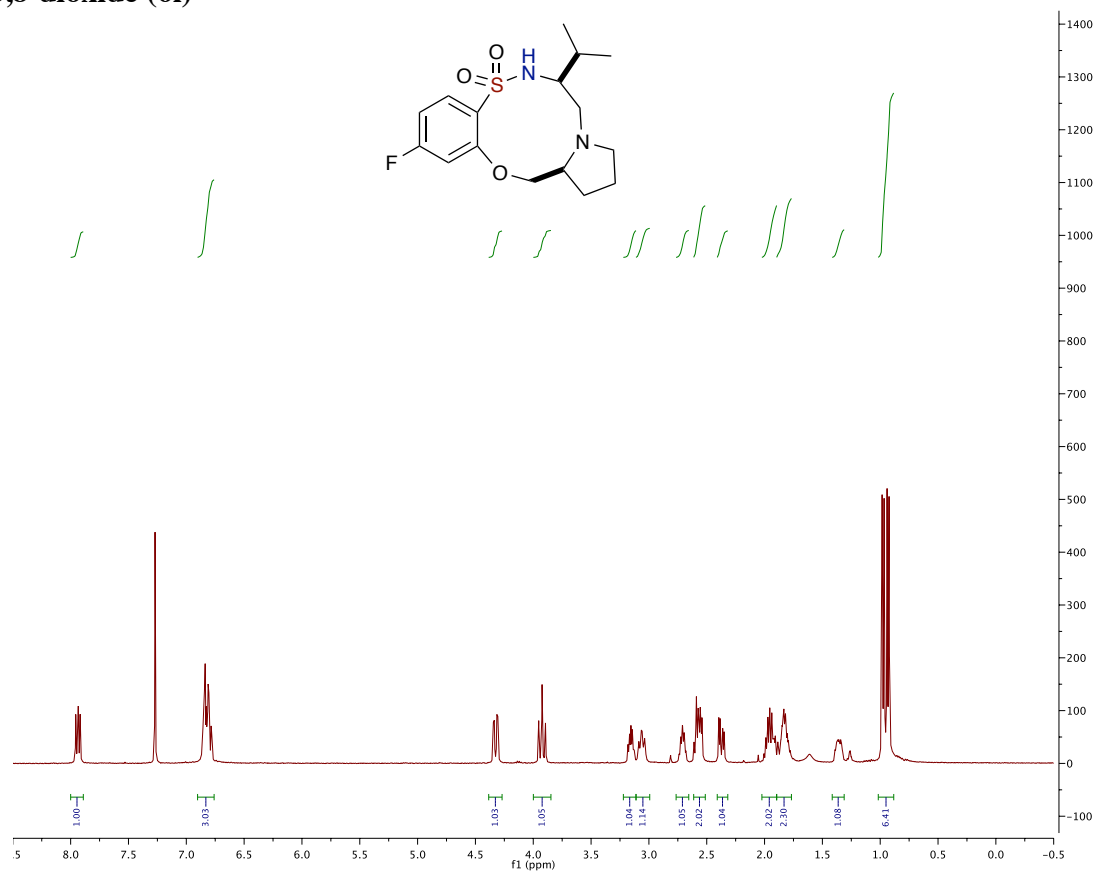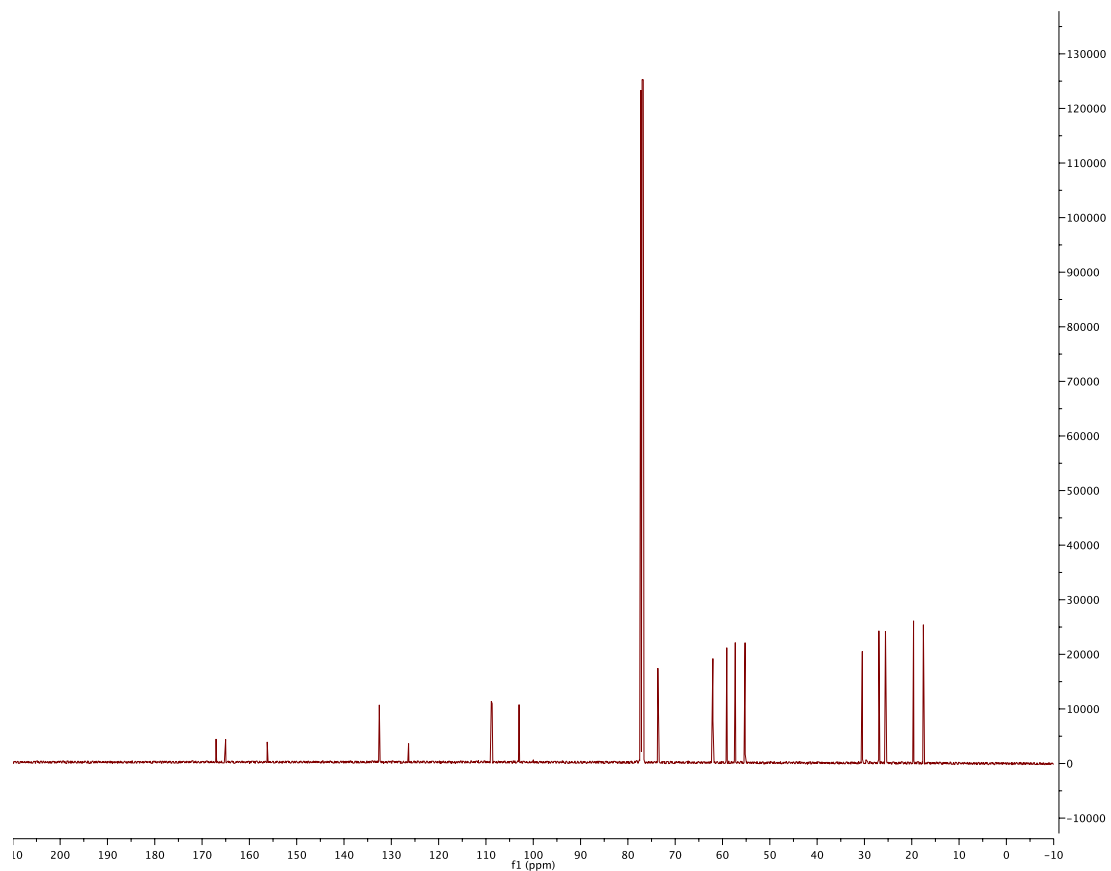

**(R)-9-fluoro-2,3,5,7,14,14a-hexahydro-1H-spiro[benzo[*b*]pyrrolo[1,2-*h*][1,4,5,8]oxathiadiazecine-6,1'-cyclohexane] 8,8-dioxide (6m)**

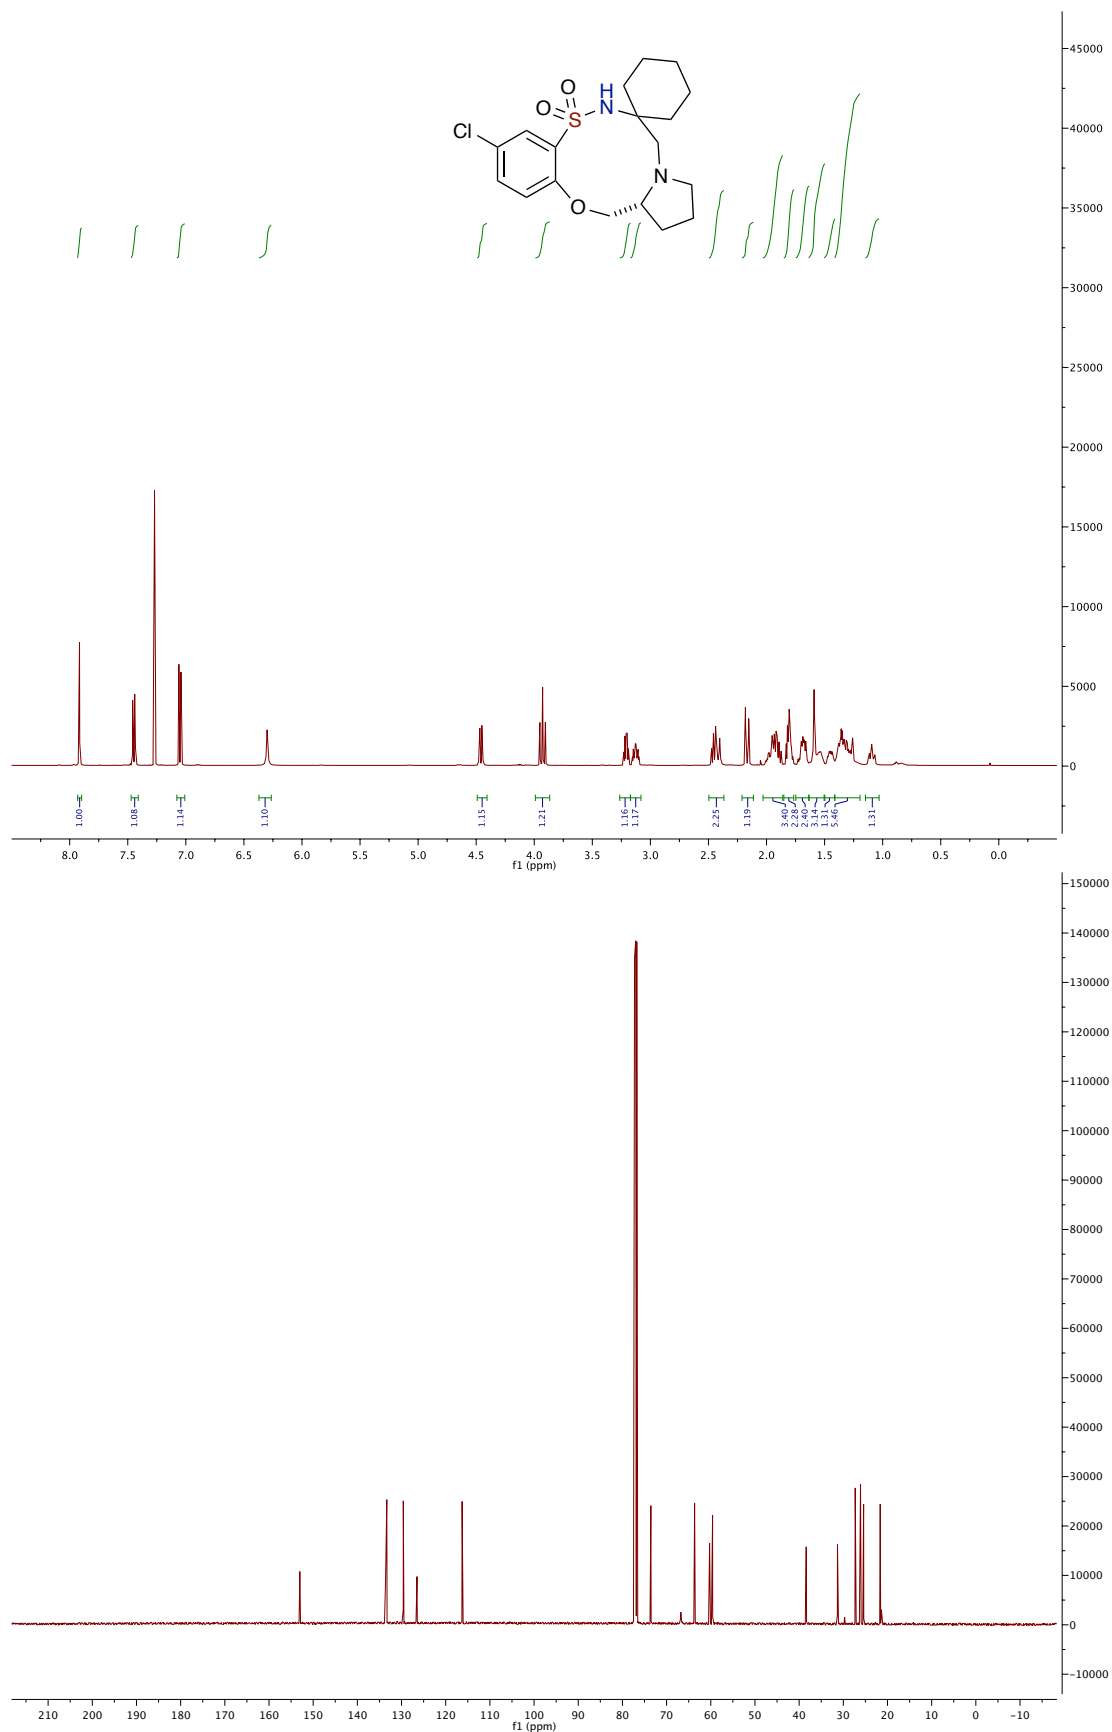

**(7S)-2-bromo-7-isopropyl-7,8,10,11,12,13,13a,14-octahydro-6H-benzo[b]pyrido[1,2-h][1,4,5,8]oxathiazine 5,5-dioxide (6n)**

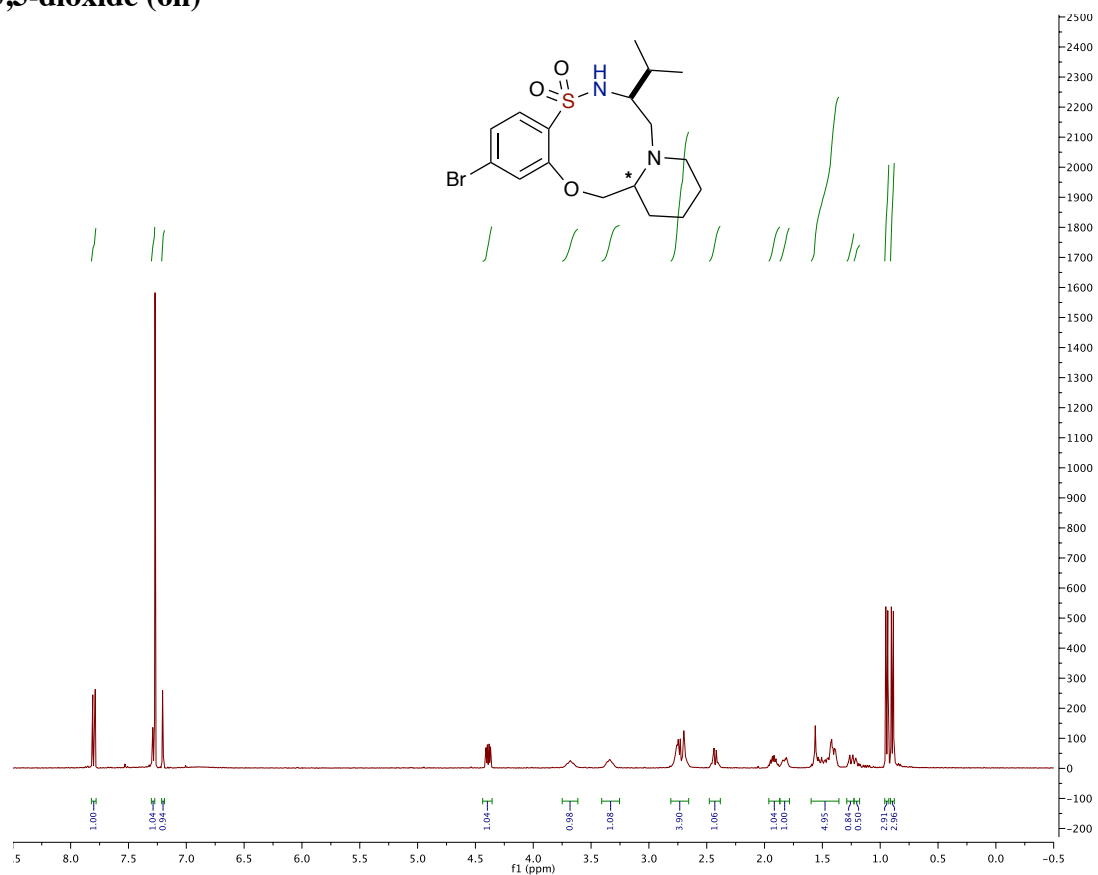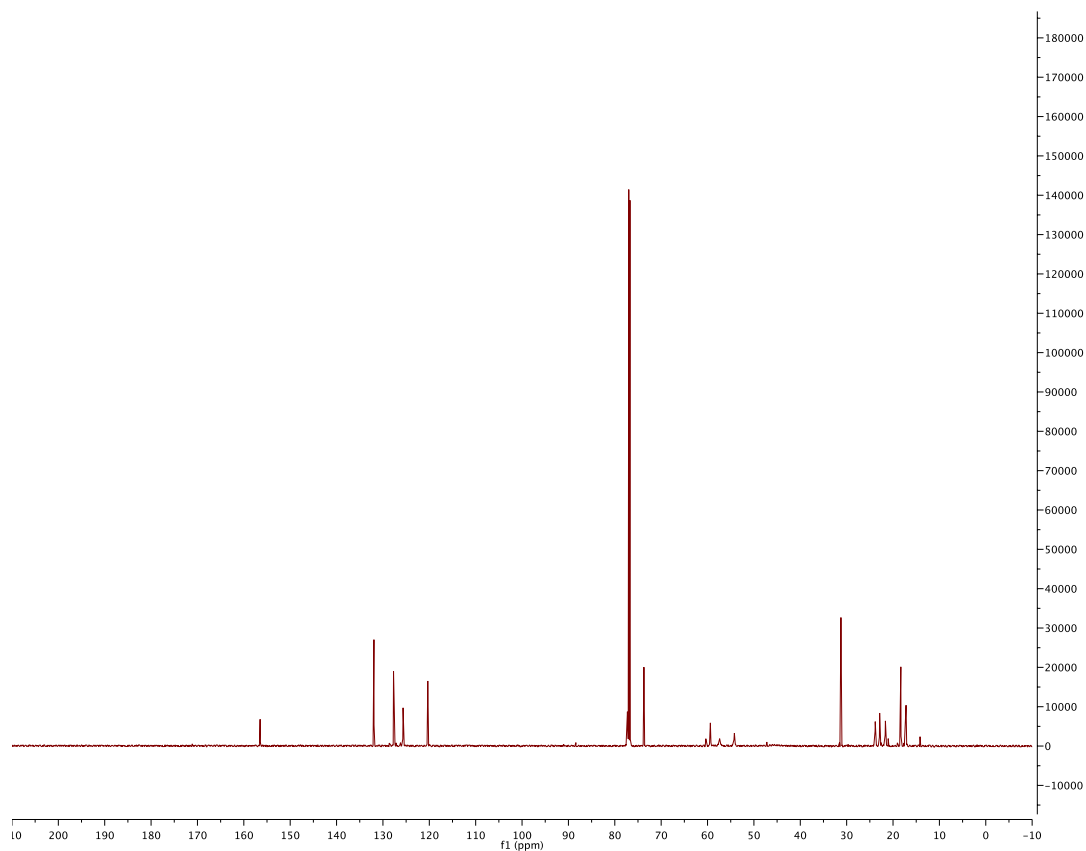

**(7S)-2-bromo-7-isobutyl-6,7,8,10,11,12,13,13a,14,15-decahydrobenzo[*b*]pyrido[1,2-*h*][1,4,5,8]oxathiazacycloundecine 5,5-dioxide (60)**

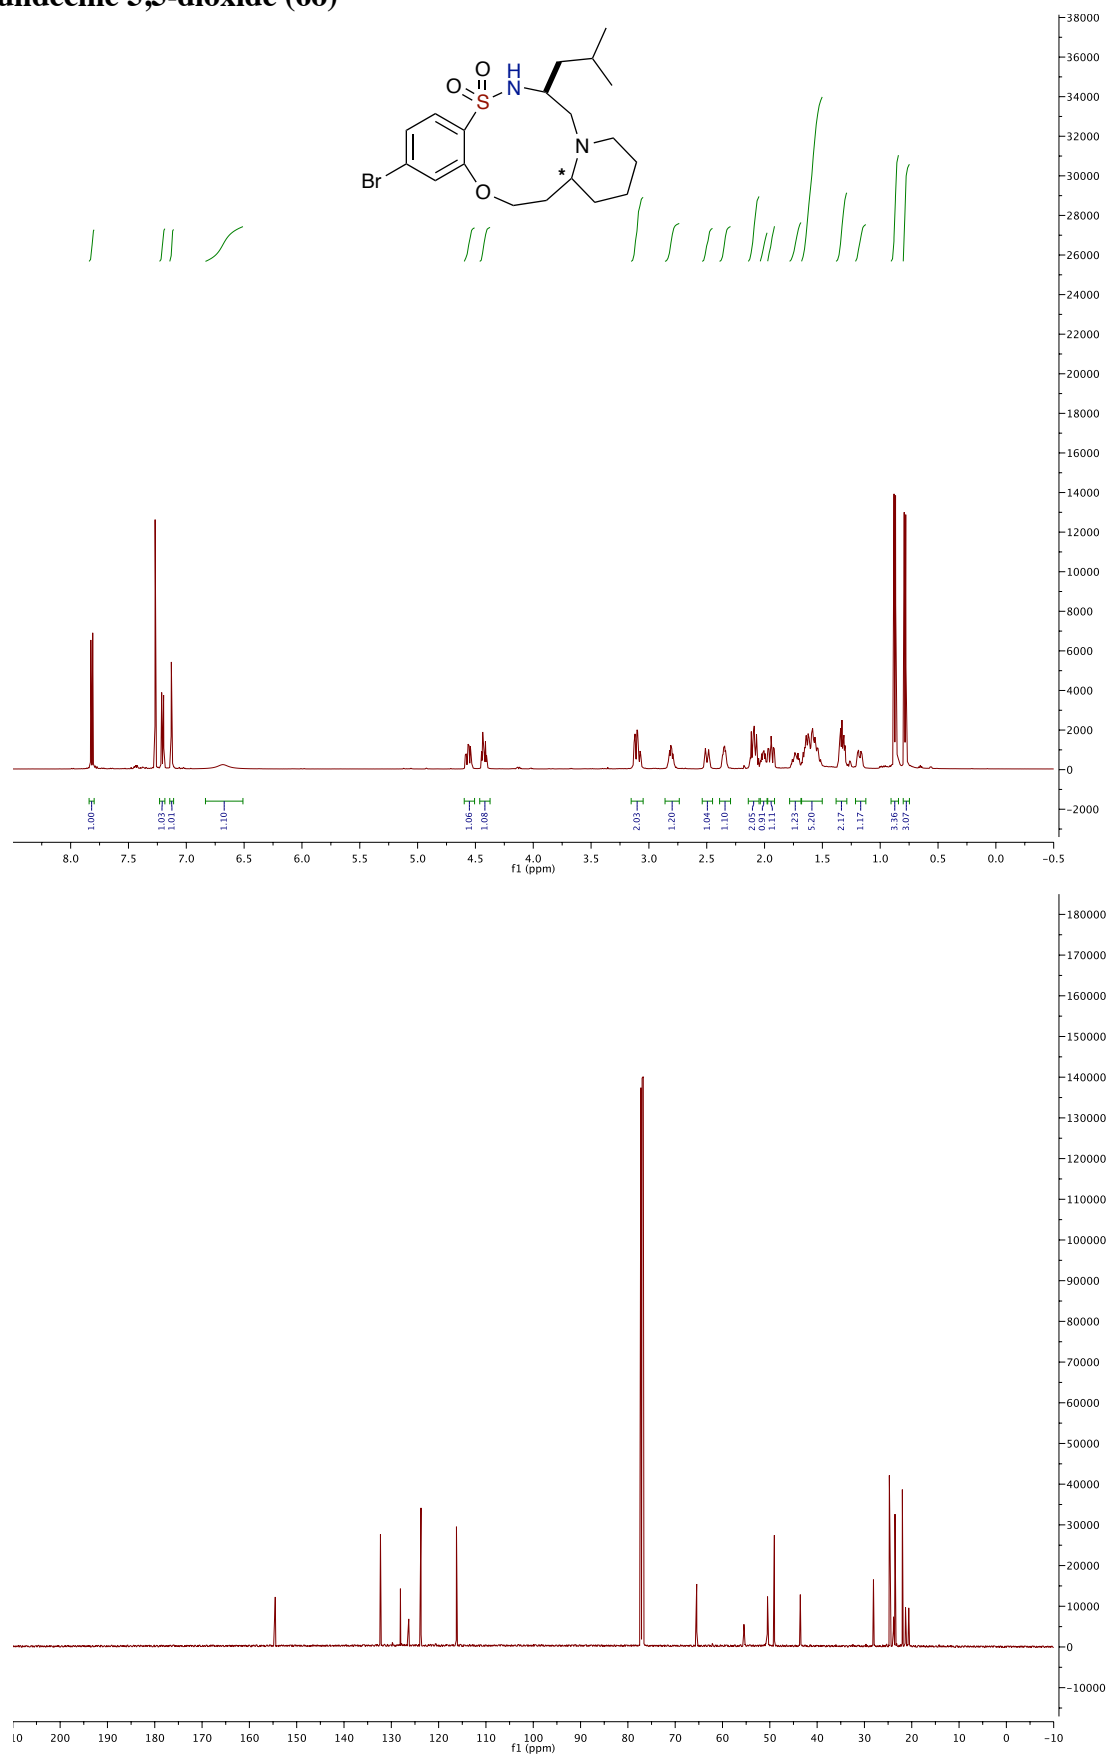

**(7*S*,13*aS*)-2-bromo-7-isopropyl-6,7,8,10,11,12,13,13*a*,14,15-decahydrobenzo[*b*]pyrido[1,2-*h*][1,4,5,8]oxa-thiadiazacycloundecine 5,5-dioxide (6p)**

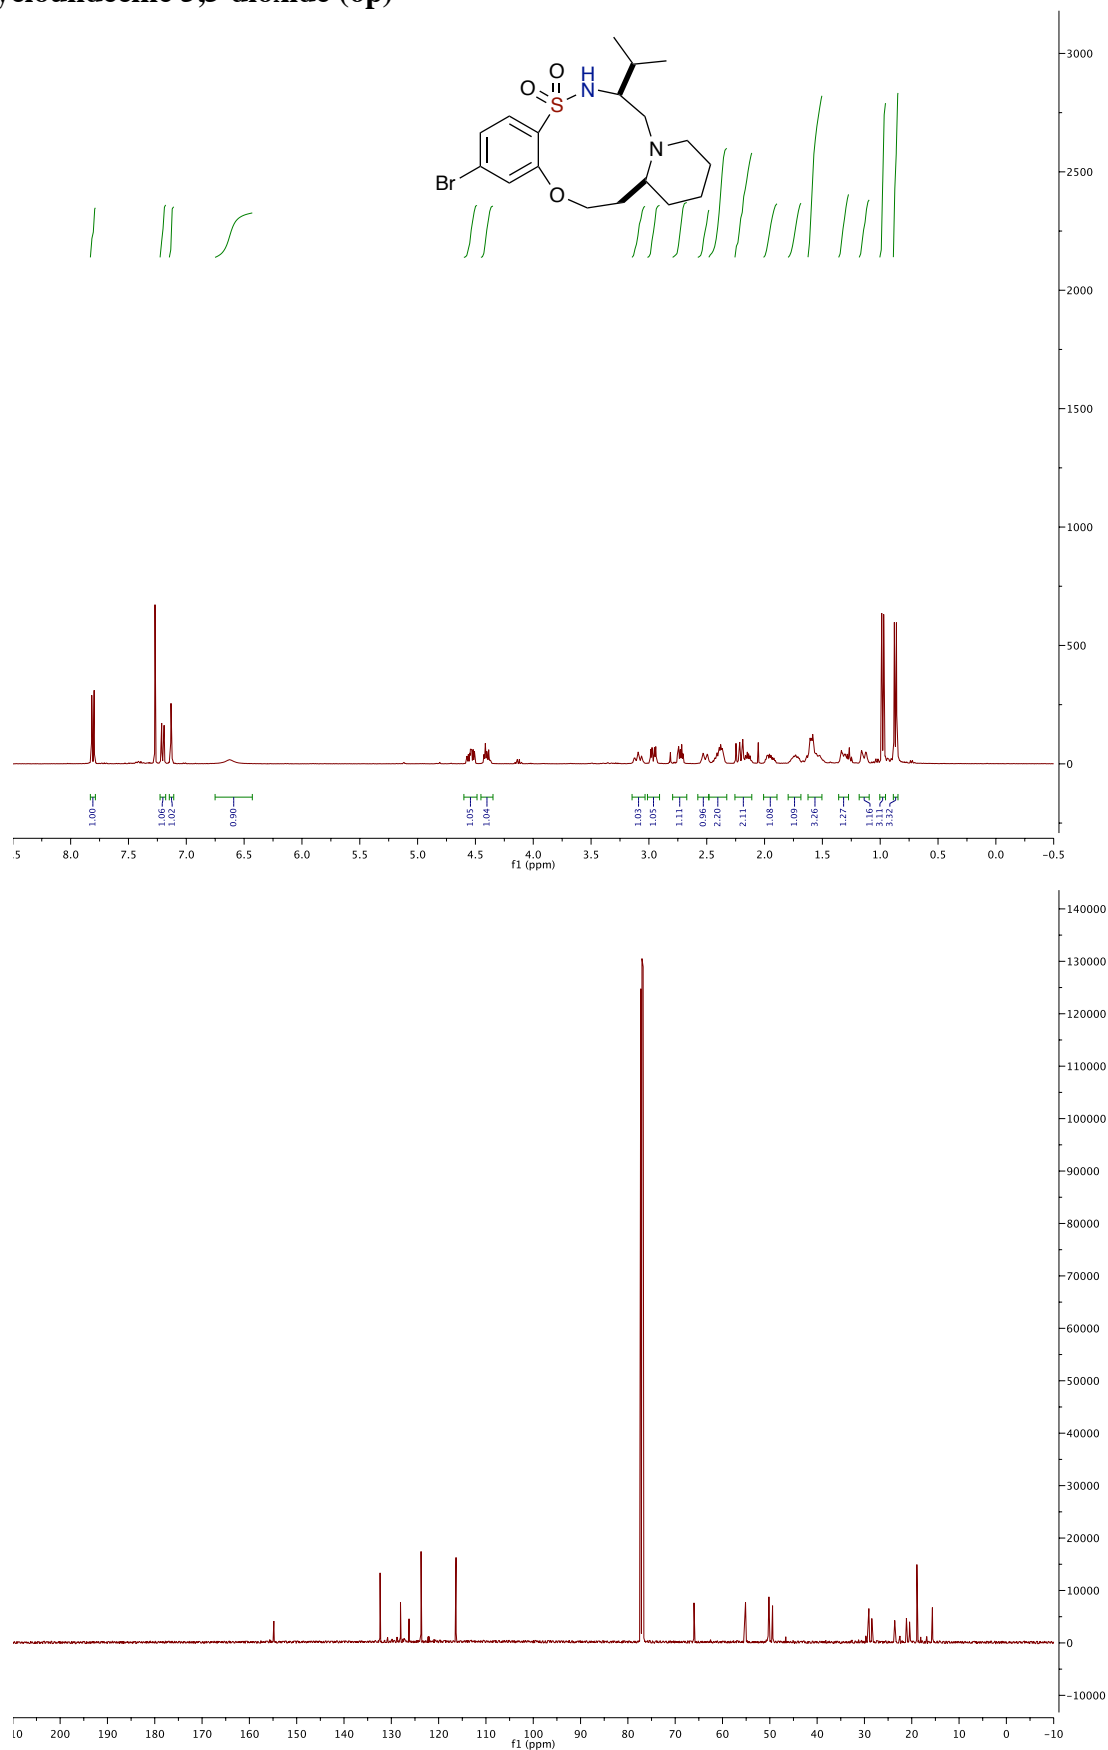

**Figure 2.** X-ray crystal structure of sultam **6p** where the thermal ellipsoids are set at a 50% probability level.

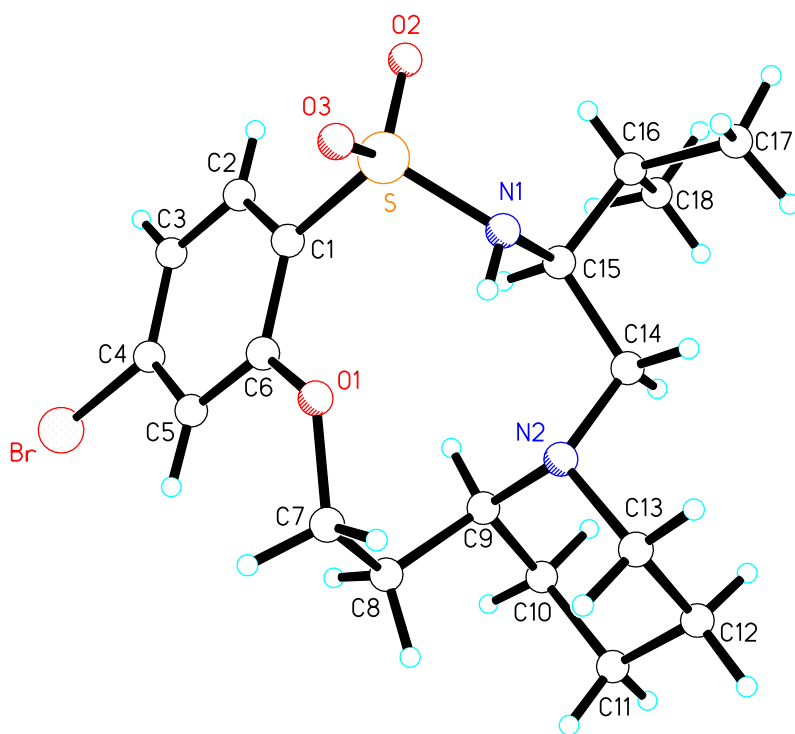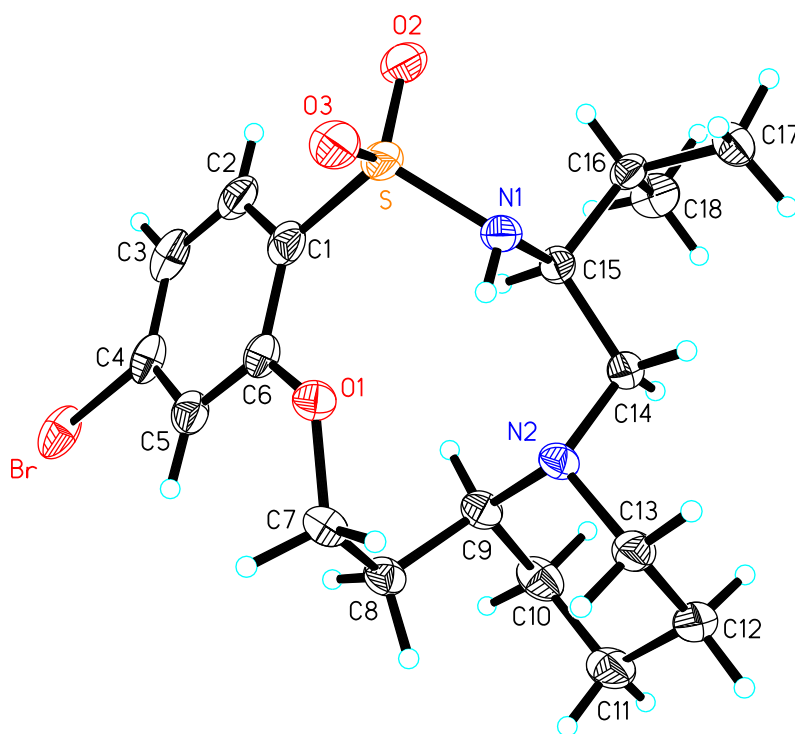

**3*S*,6*S*,7*R*)-10-fluoro-3-isopropyl-5,6-dimethyl-7-phenyl-2,3,4,5,6,7-hexahydrobenzo[*b*][1,4,5,8]oxathiazine 1,1-dioxide (8a)**

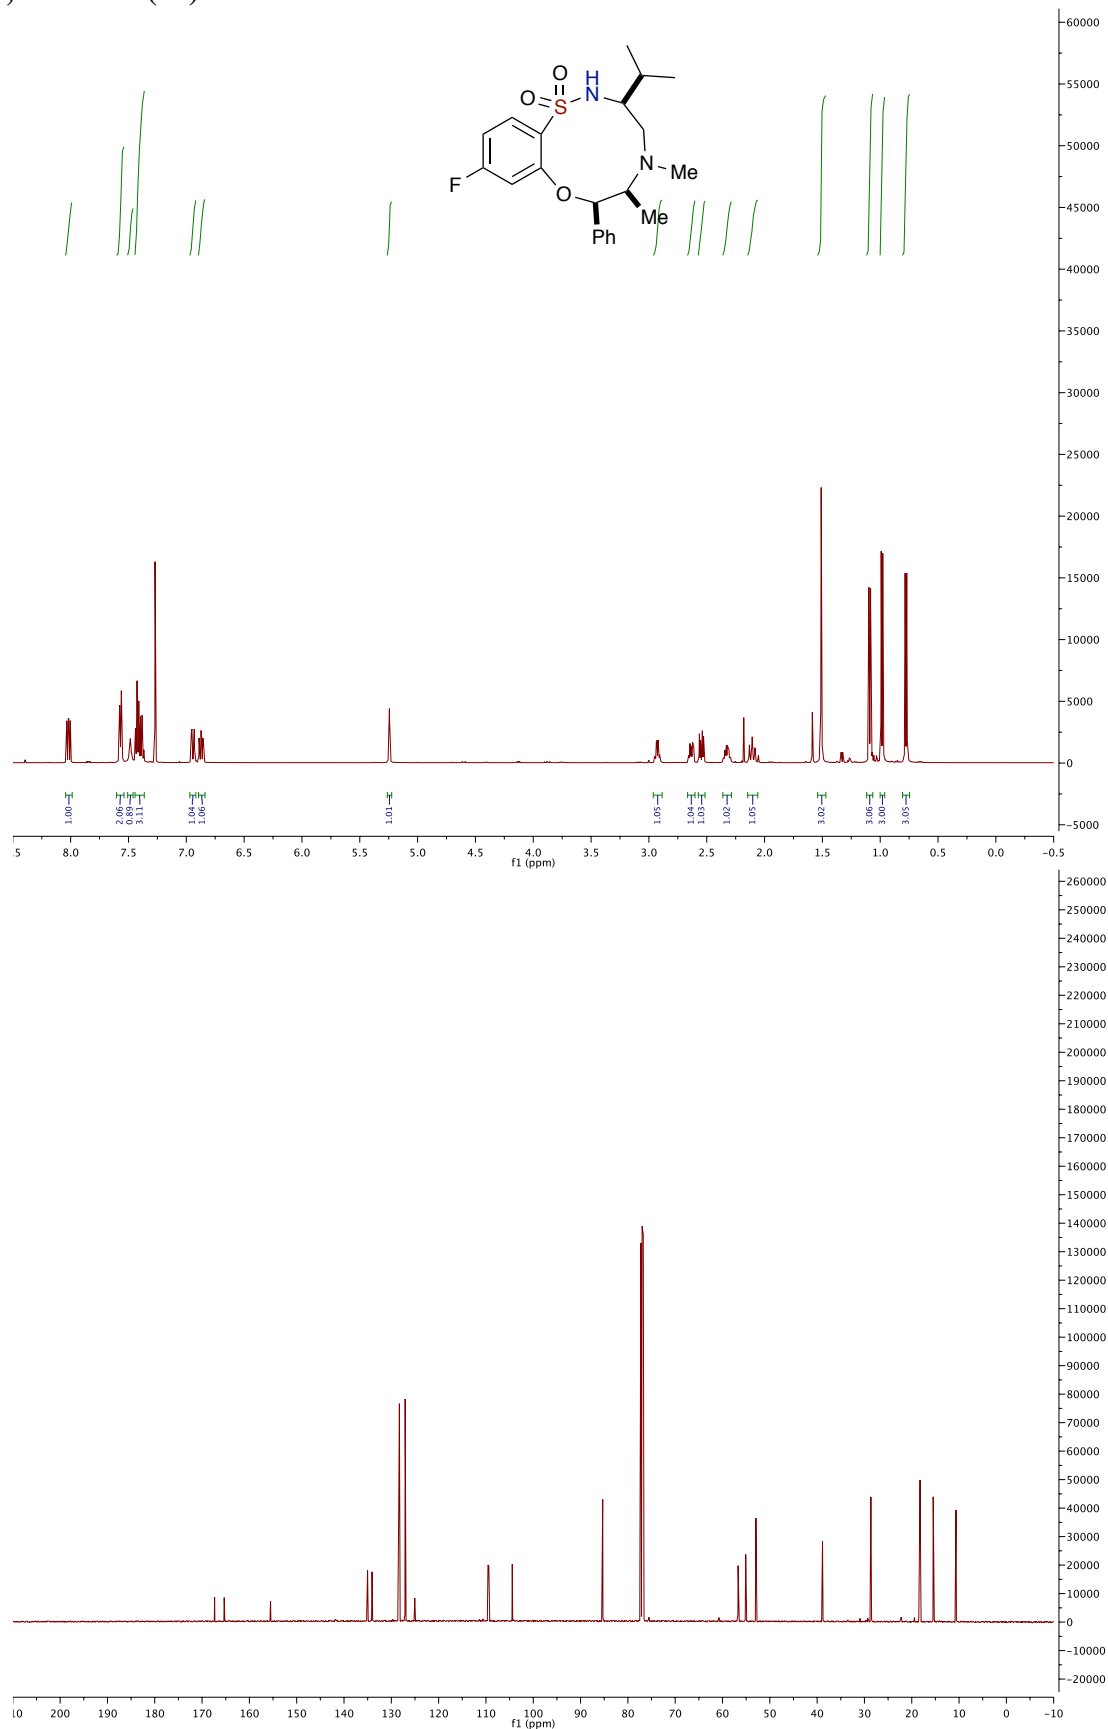



**(3*S*,6*R*,7*R*)-10-fluoro-3-isopropyl-5,6-dimethyl-7-phenyl-2,3,4,5,6,7-hexahydrobenzo[*b*][1,4,5,8]oxathiazine 1,1-dioxide (8b)**

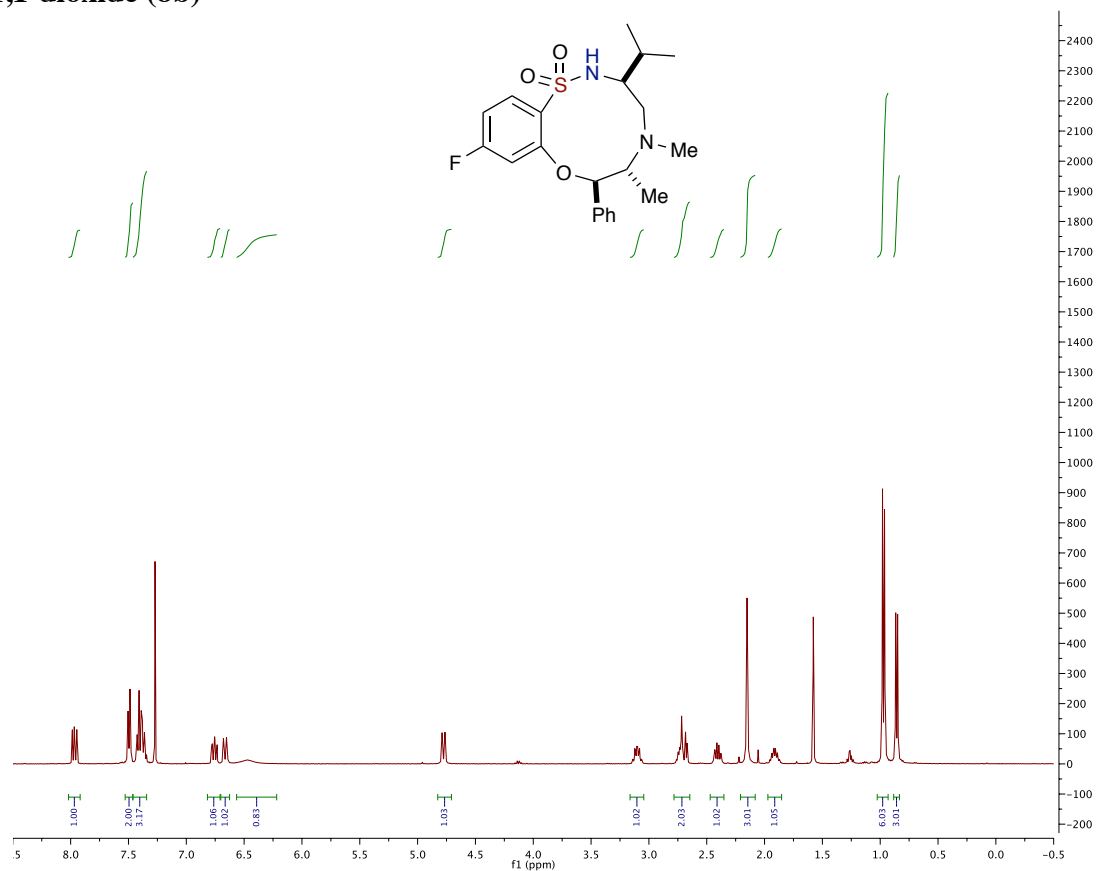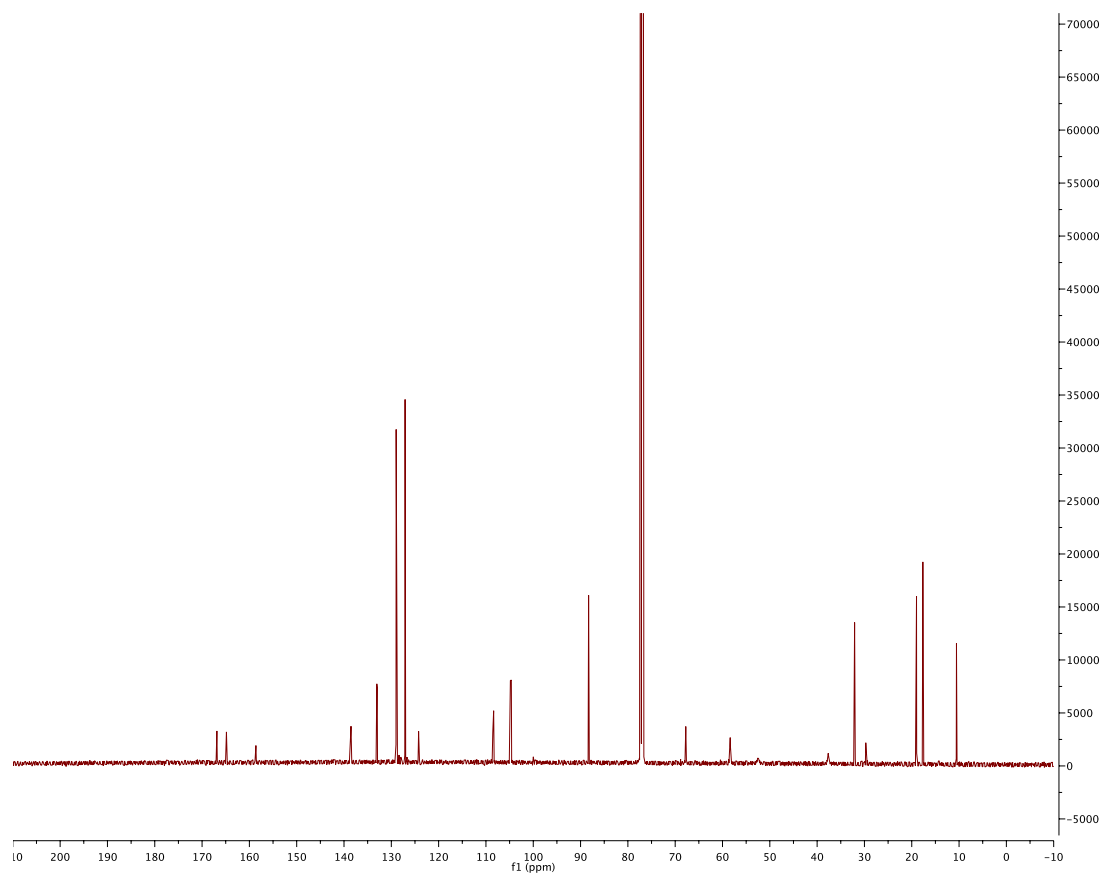

**Figure 3.** X-ray crystal structure of sultam **8b** where the thermal ellipsoids are set at a 50% probability level.

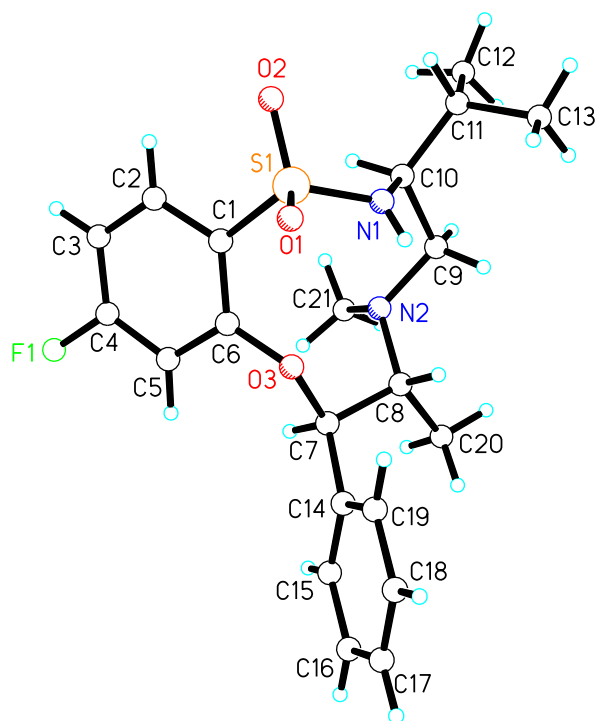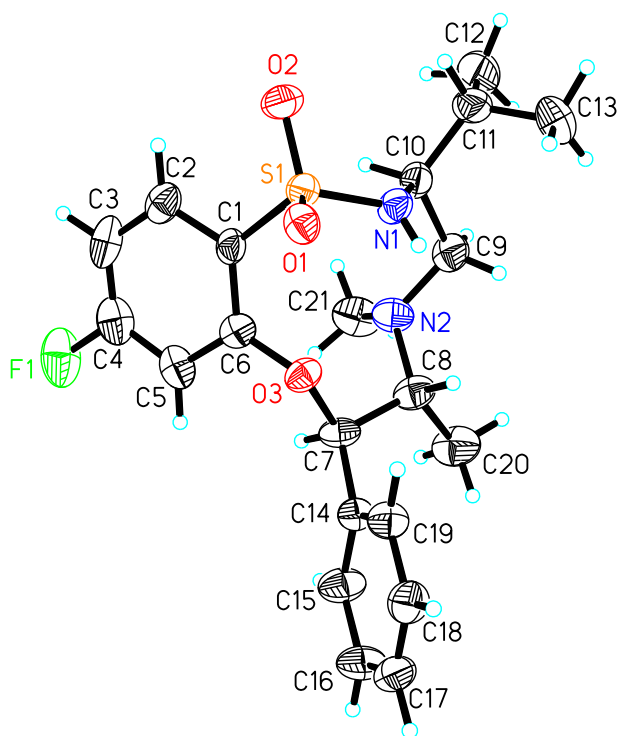

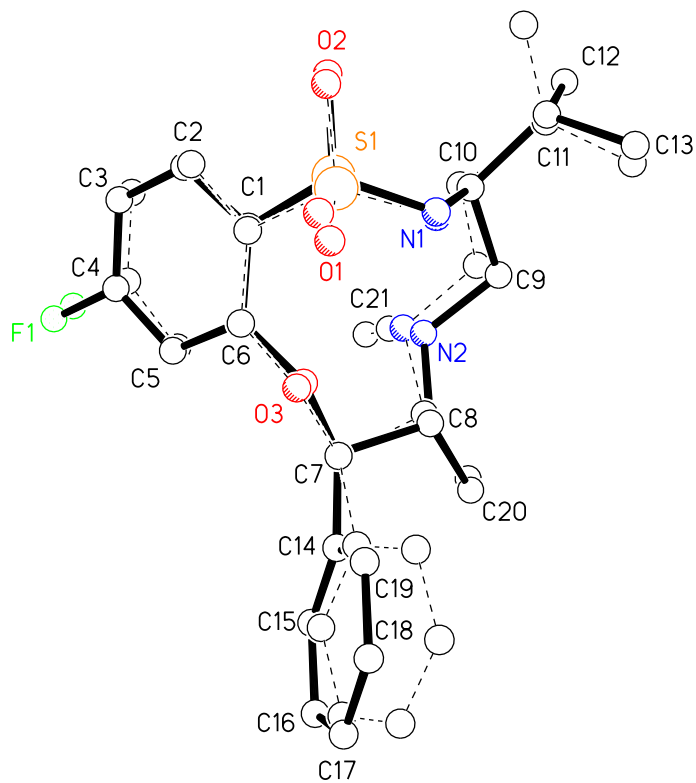

**(3*S*,6*S*,7*S*)-10-bromo-3-isopropyl-5,6-dimethyl-7-phenyl-2,3,4,5,6,7-hexahydrobenzo[*b*][1,4,5,8]oxathiazine 1,1-dioxide (8c)**

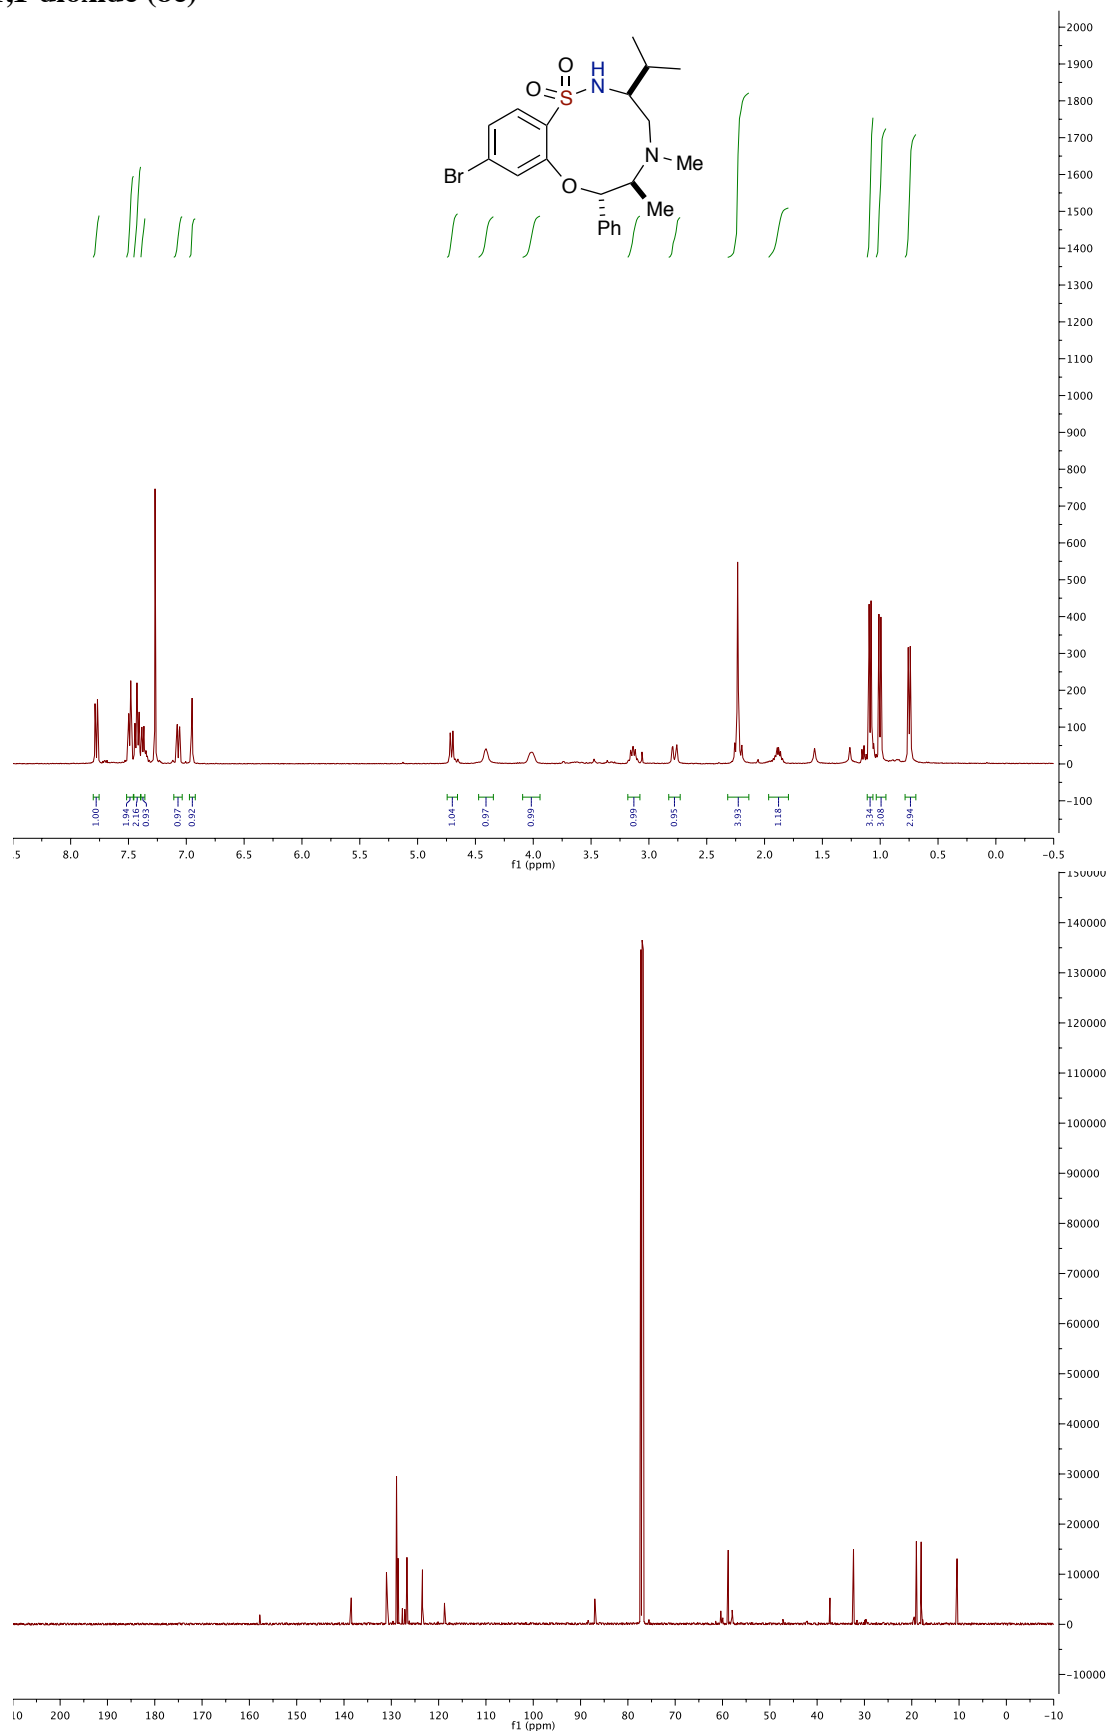

**(3*S*,6*S*,7*S*)-10-fluoro-3-isobutyl-5,6-dimethyl-7-phenyl-2,3,4,5,6,7-hexahydrobenzo[*b*][1,4,5,8]oxathiazine 1,1-dioxide (8d)**

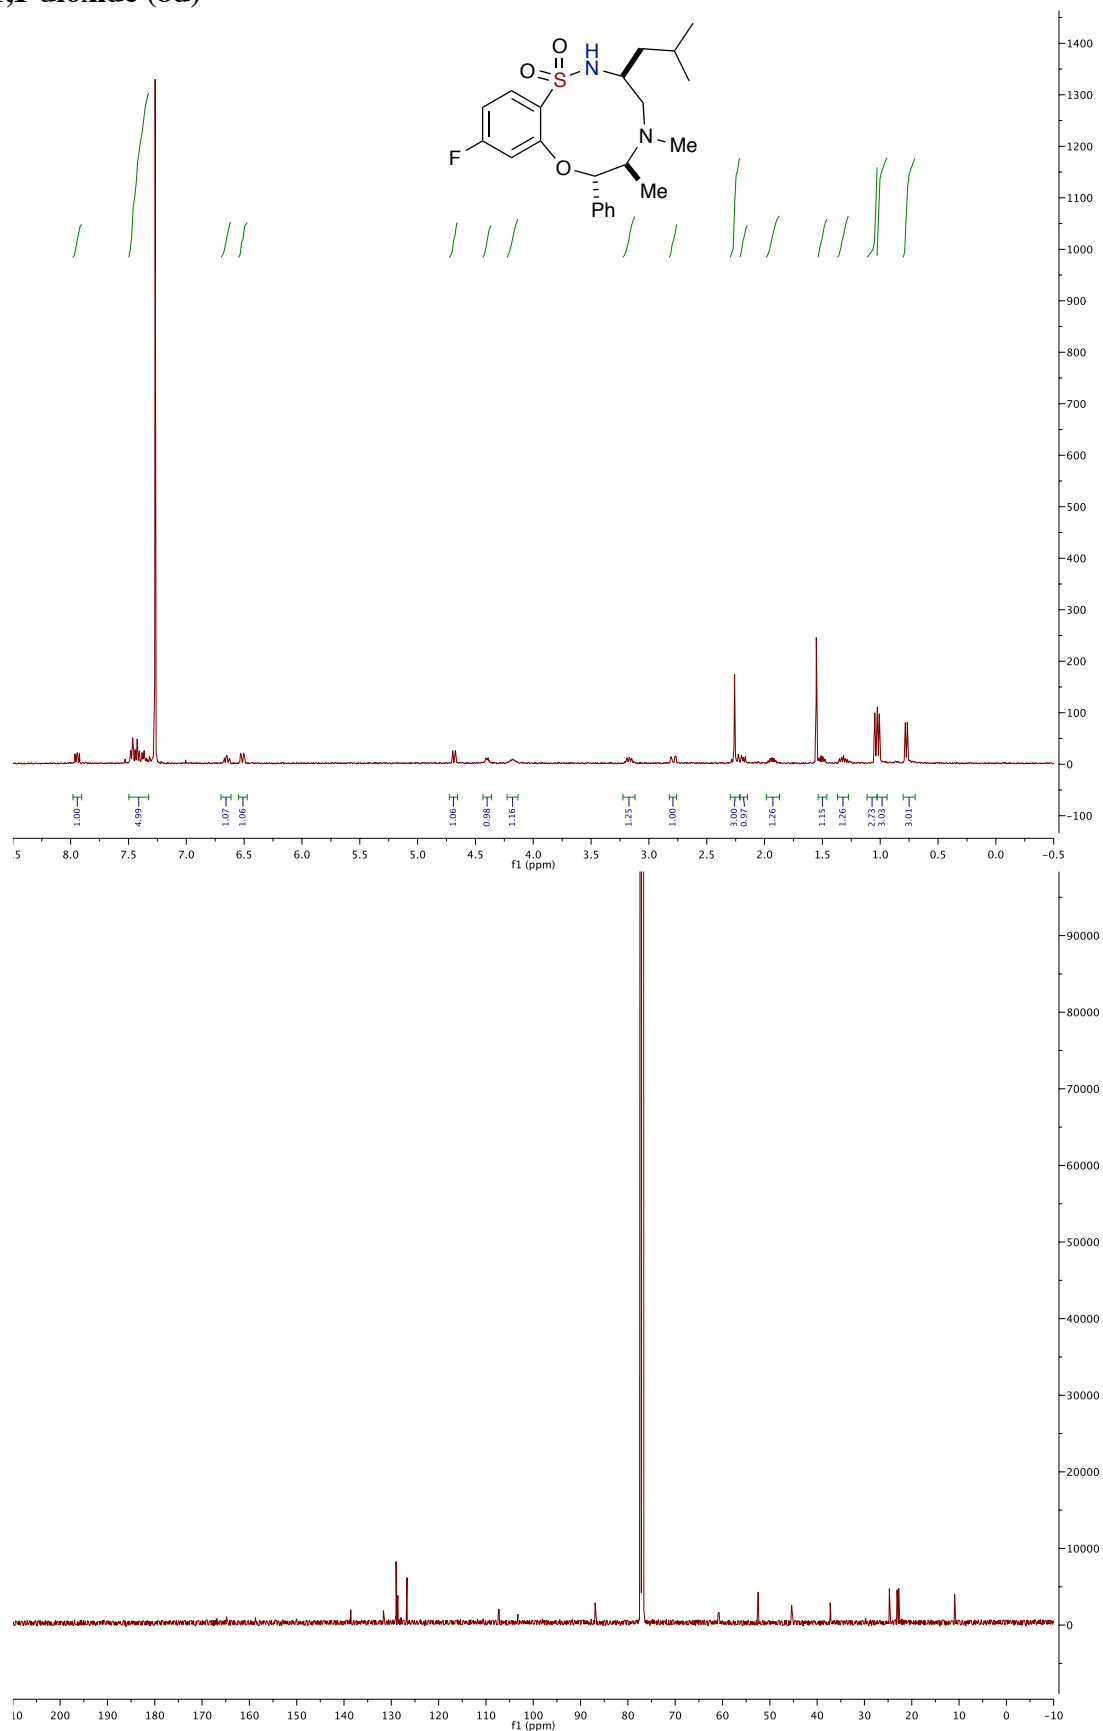

**(3*S*,6*S*)-10-fluoro-3,6-diisobutyl-5-methyl-2,3,4,5,6,7-hexahydrobenzo[*b*][1,4,5,8]oxathiadiazecine-1,1-dioxide (8e)**

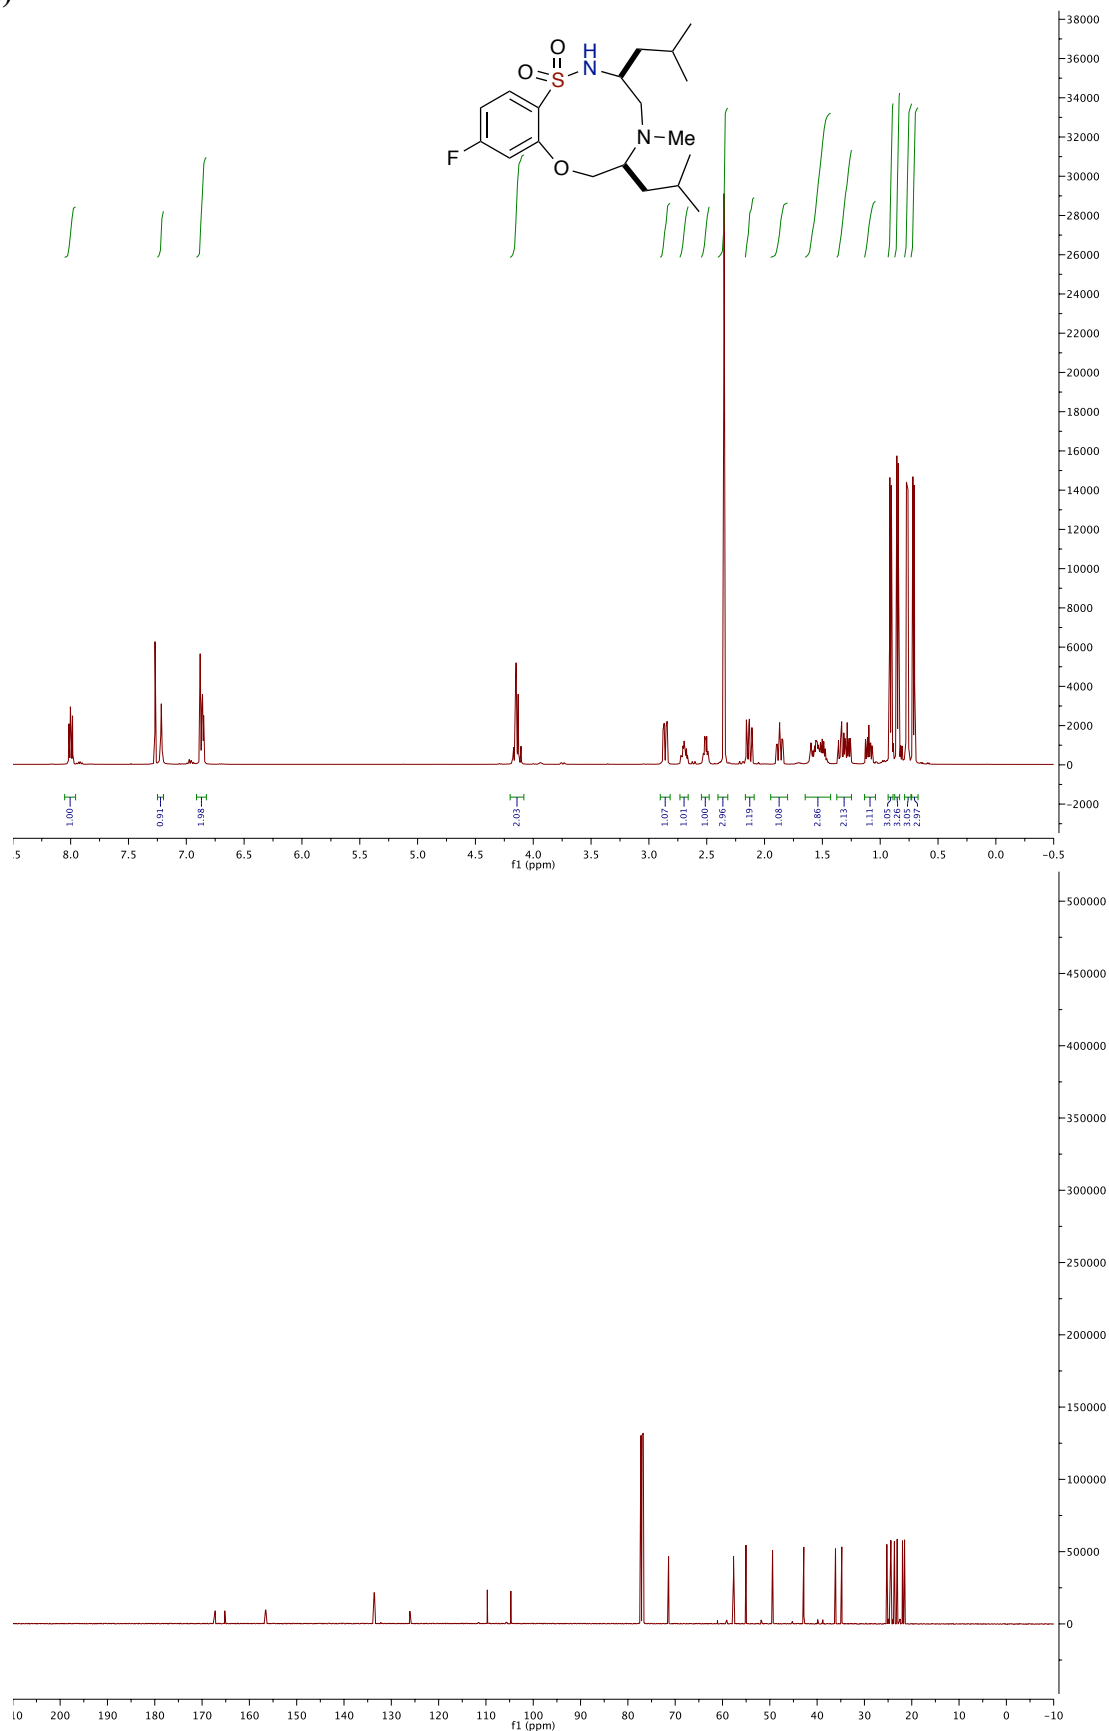

**(S)-10-fluoro-3-isobutyl-5-methyl-3,4,5,7-tetrahydro-2H-spiro[benzo[*b*][1,4,5,8]oxathiadiazecine-6,1'-cyclohexane] 1,1-dioxide (8f)**

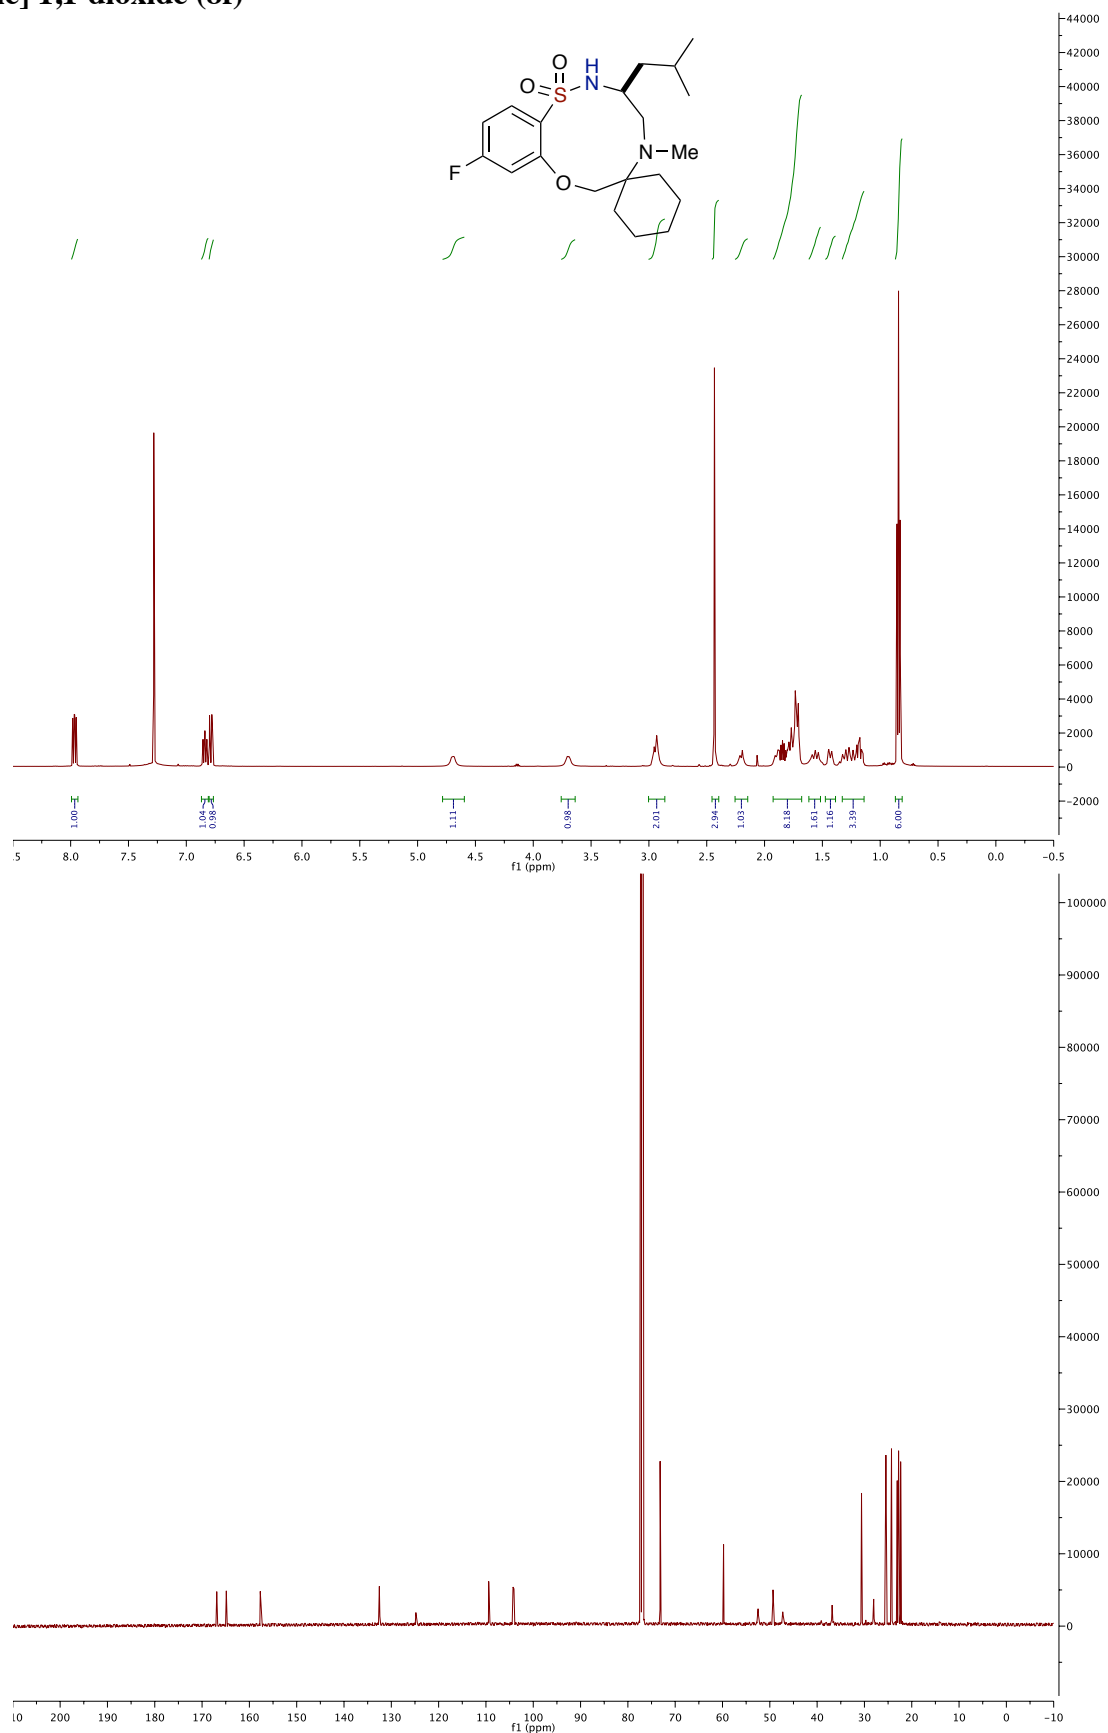

**(S)-3-isopropyl-7-methyl-5-propyl-2,3,4,5-tetrahydrobenzo[*f*][1,2,5]thiadiazepine 1,1-dioxide (10a)**

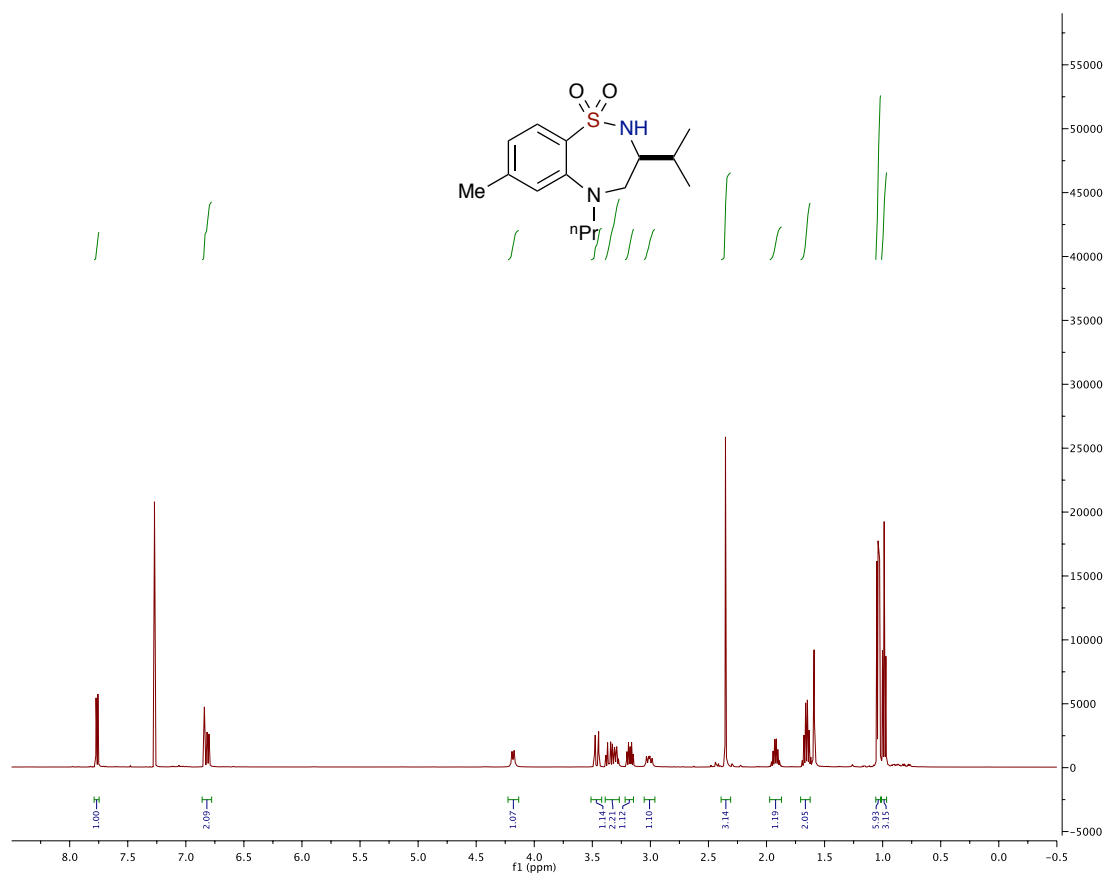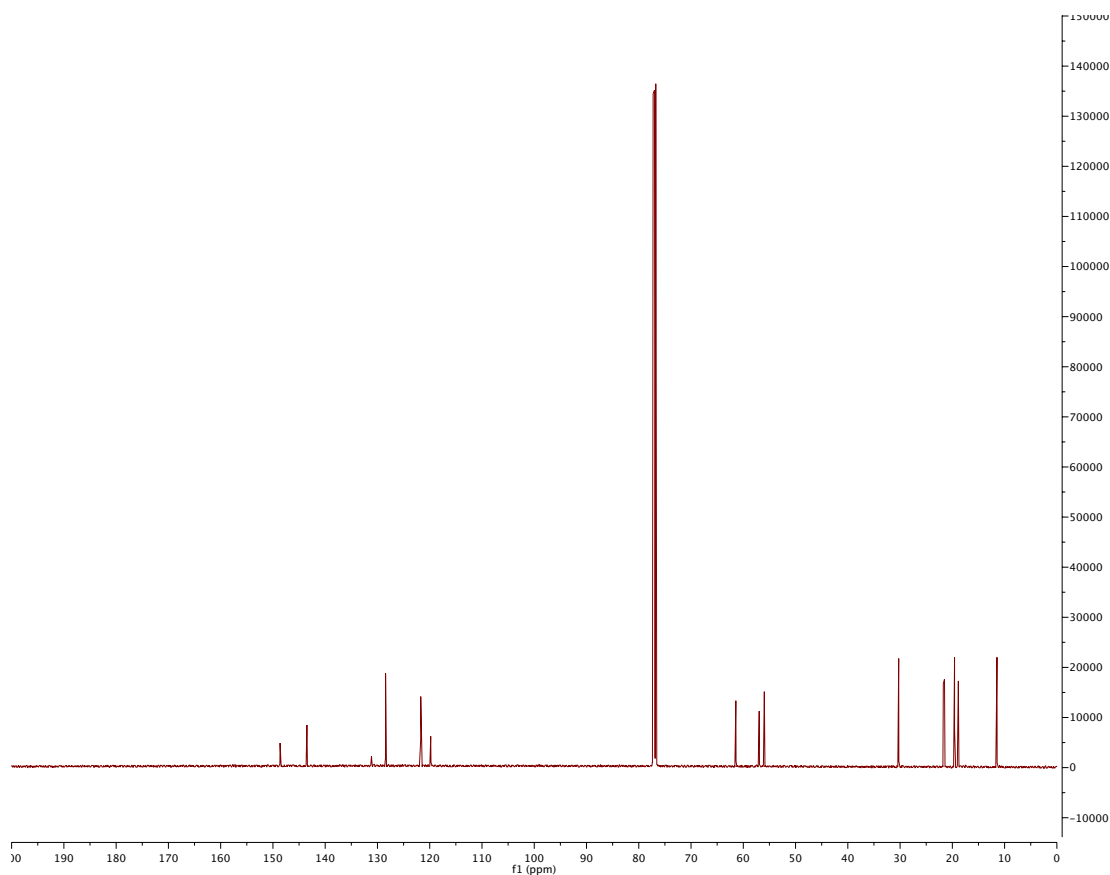



**(S)-7-bromo-5-butyl-3-isobutyl-2,3,4,5-tetrahydrobenzo[f][1,2,5]thiadiazepine 1,1-dioxide (10b)**

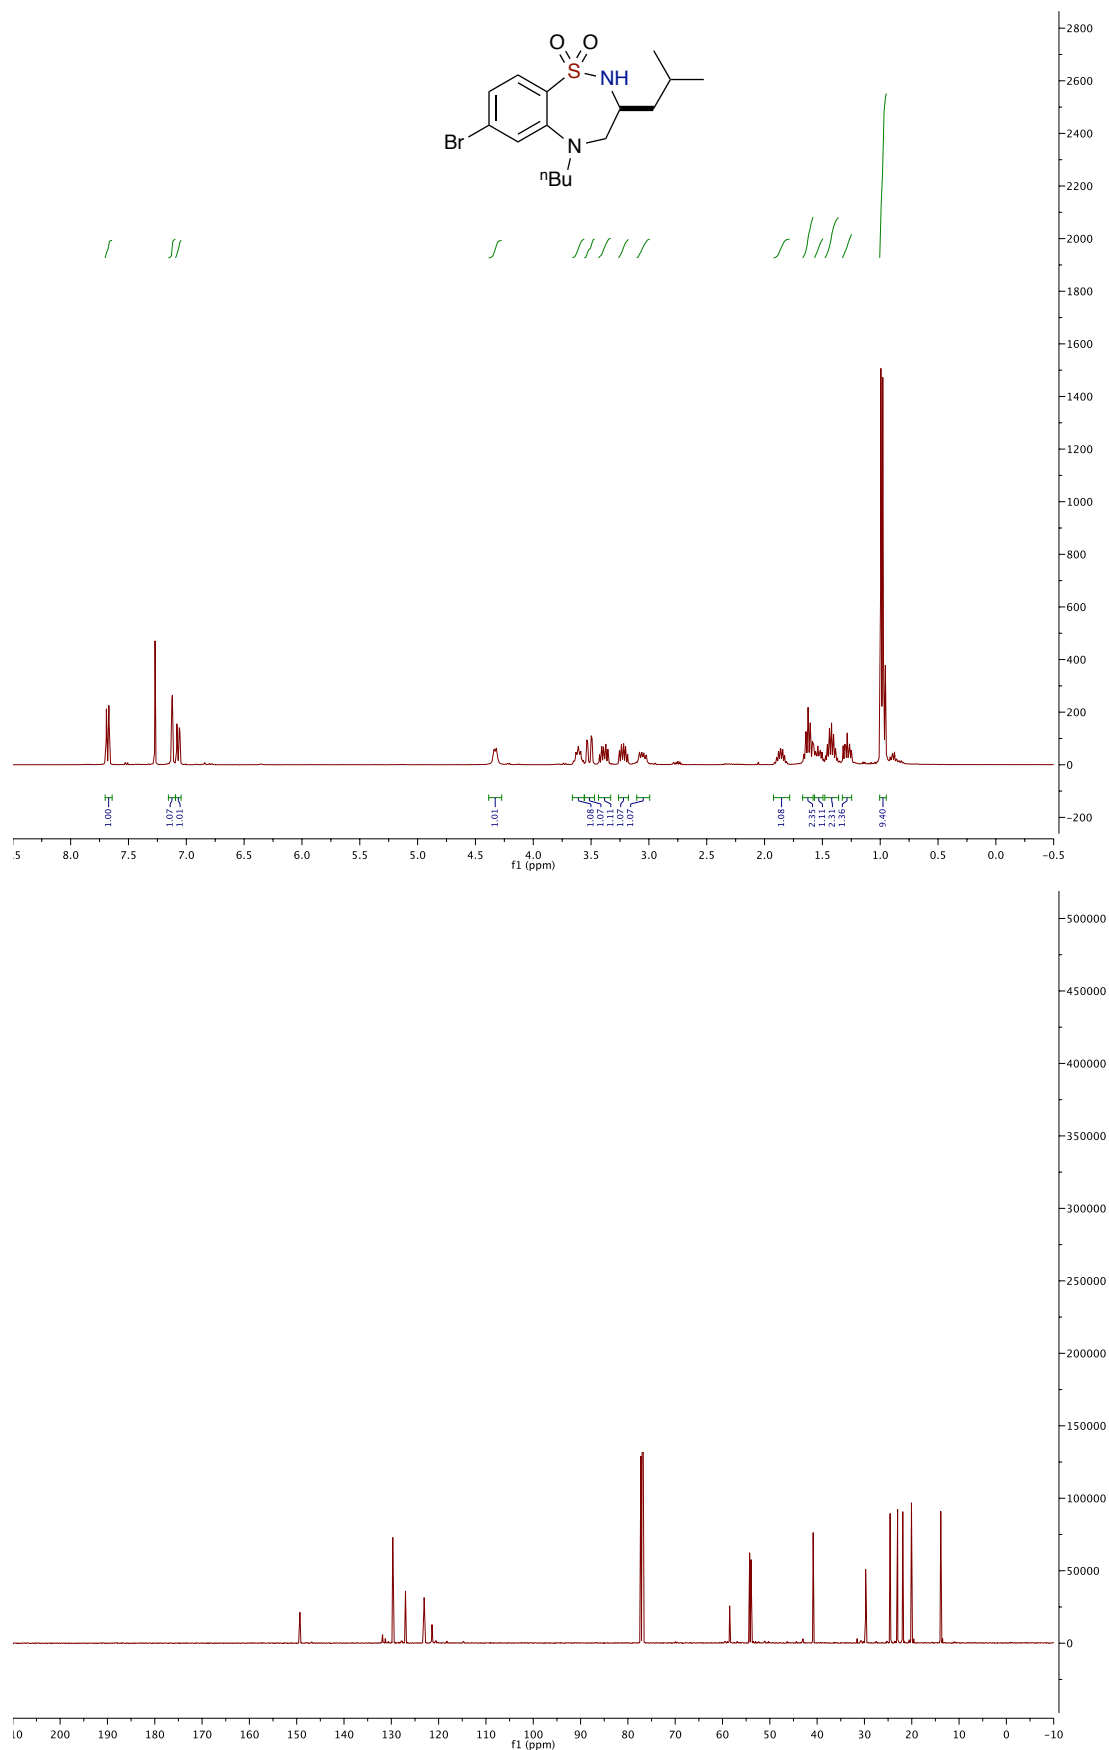

**(S)-5-benzyl-7-bromo-3-isobutyl-2,3,4,5-tetrahydrobenzo[f][1,2,5]thiadiazepine 1,1-dioxide (10c)**

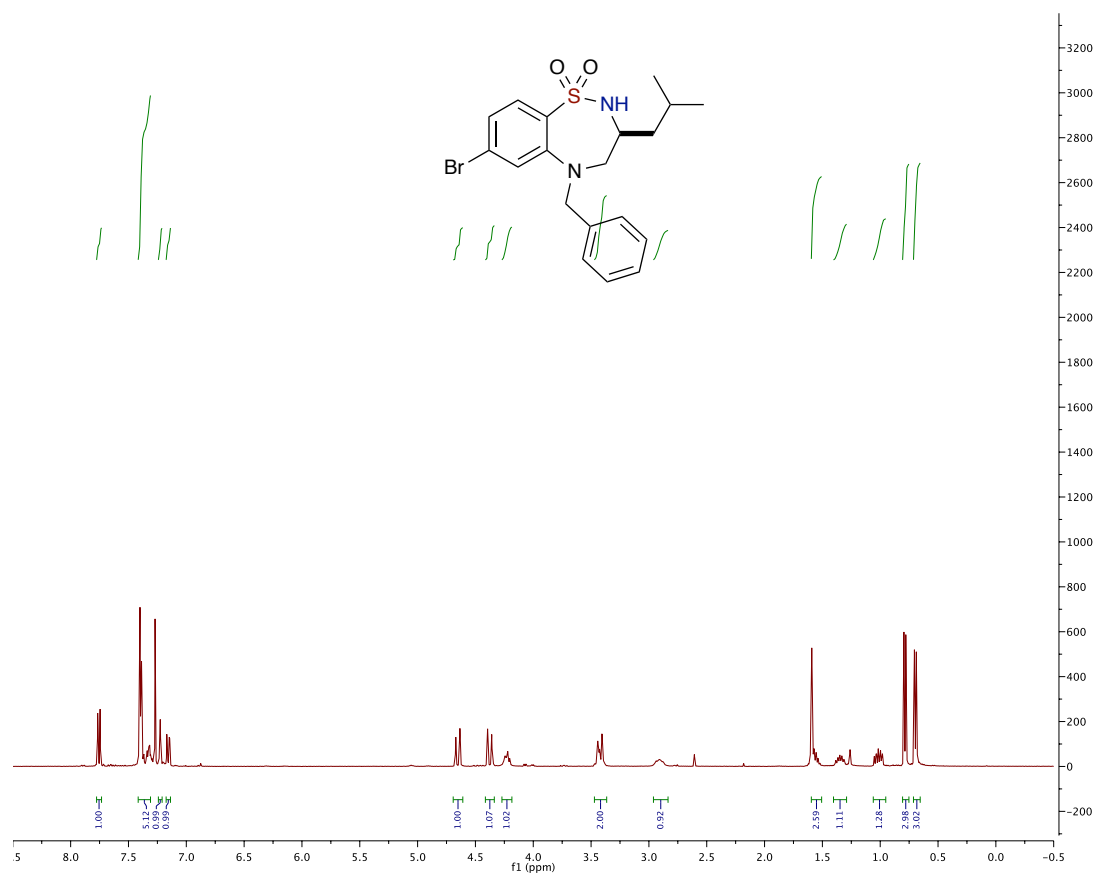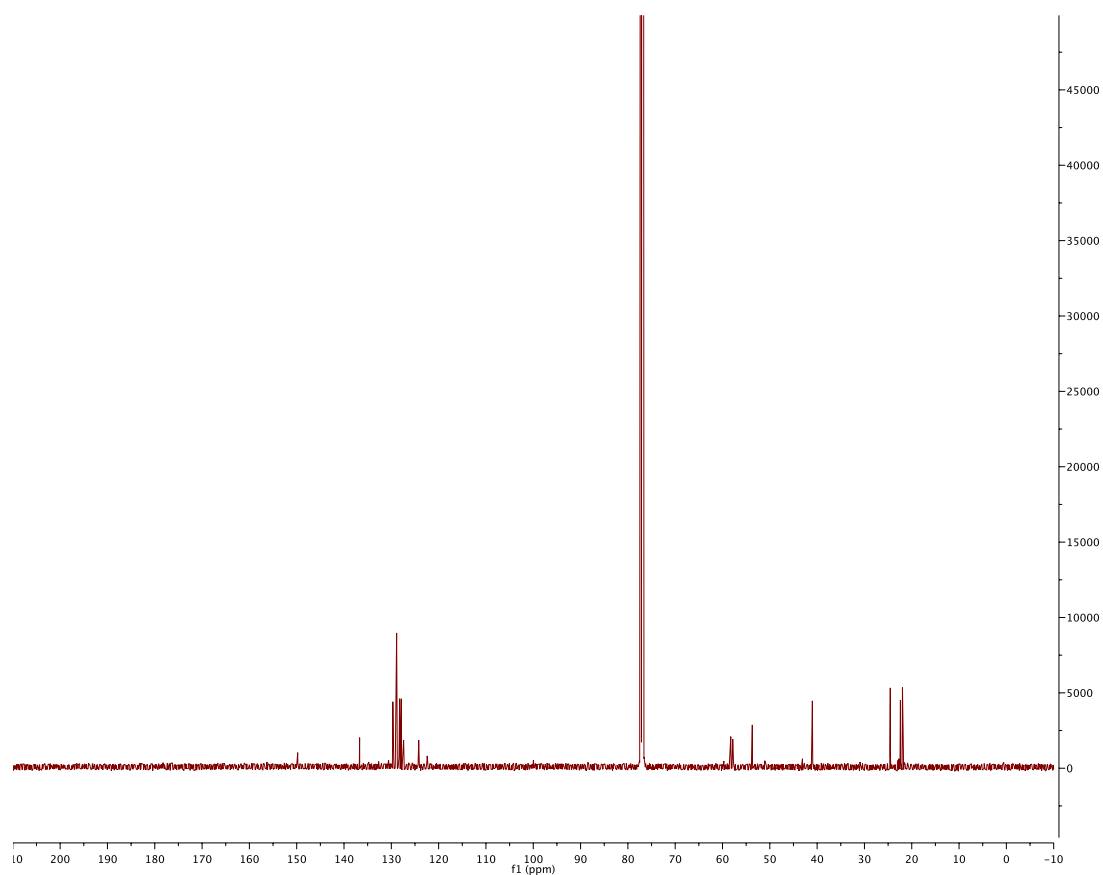

**(S)-7-bromo-3-isobutyl-5-(4-isopropylbenzyl)-2,3,4,5-tetrahydrobenzo[*f*][1,2,5]thiadiazepine 1,1-dioxide (10d)**

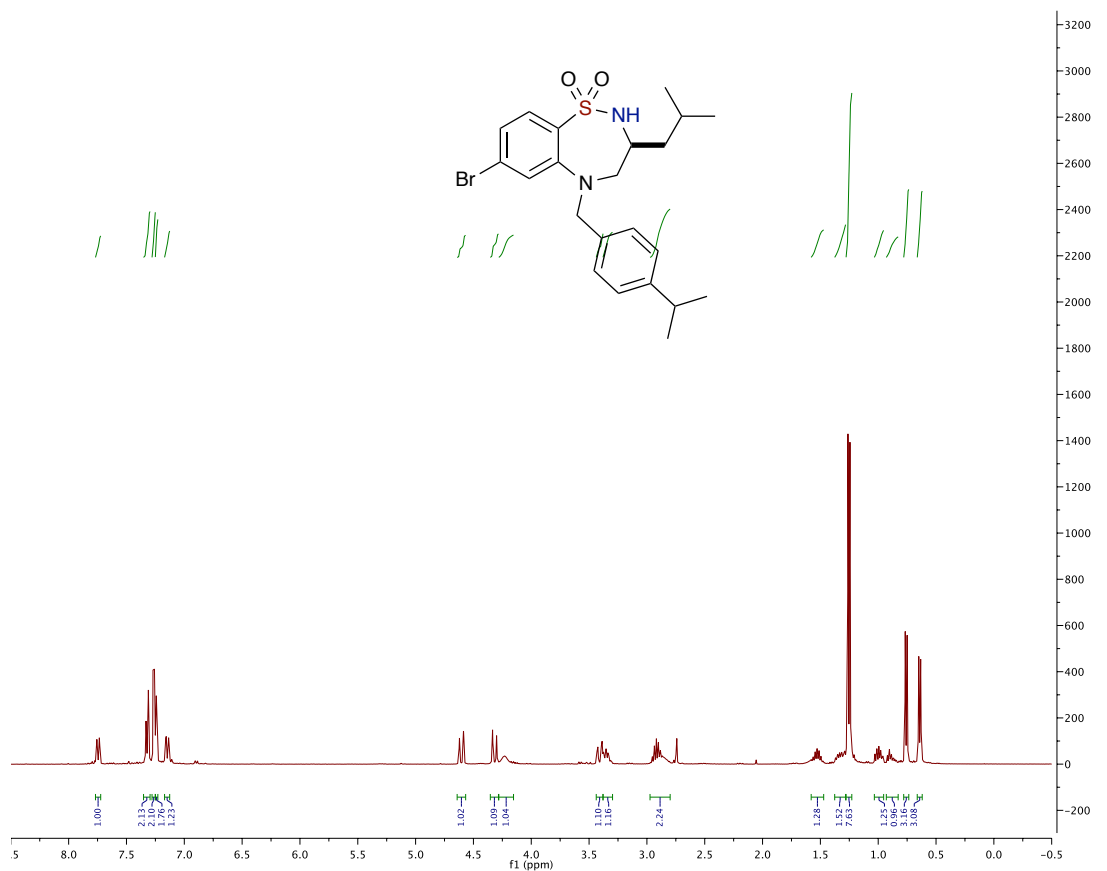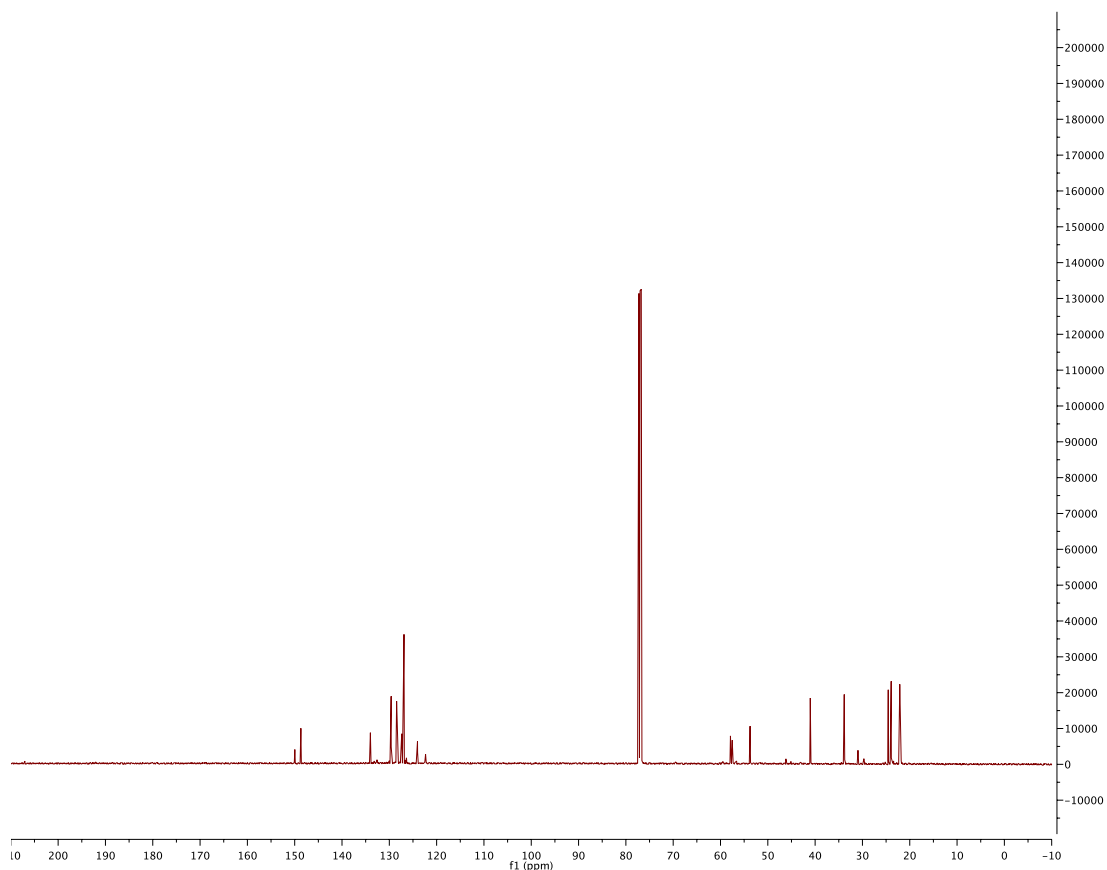

**(S)-9-fluoro-3-isopropyl-5-(4-(trifluoromethyl)benzyl)-2,3,4,5-tetrahydrobenzo[f][1,2,5]thiadiazepine 1,1-dioxide (10e)**

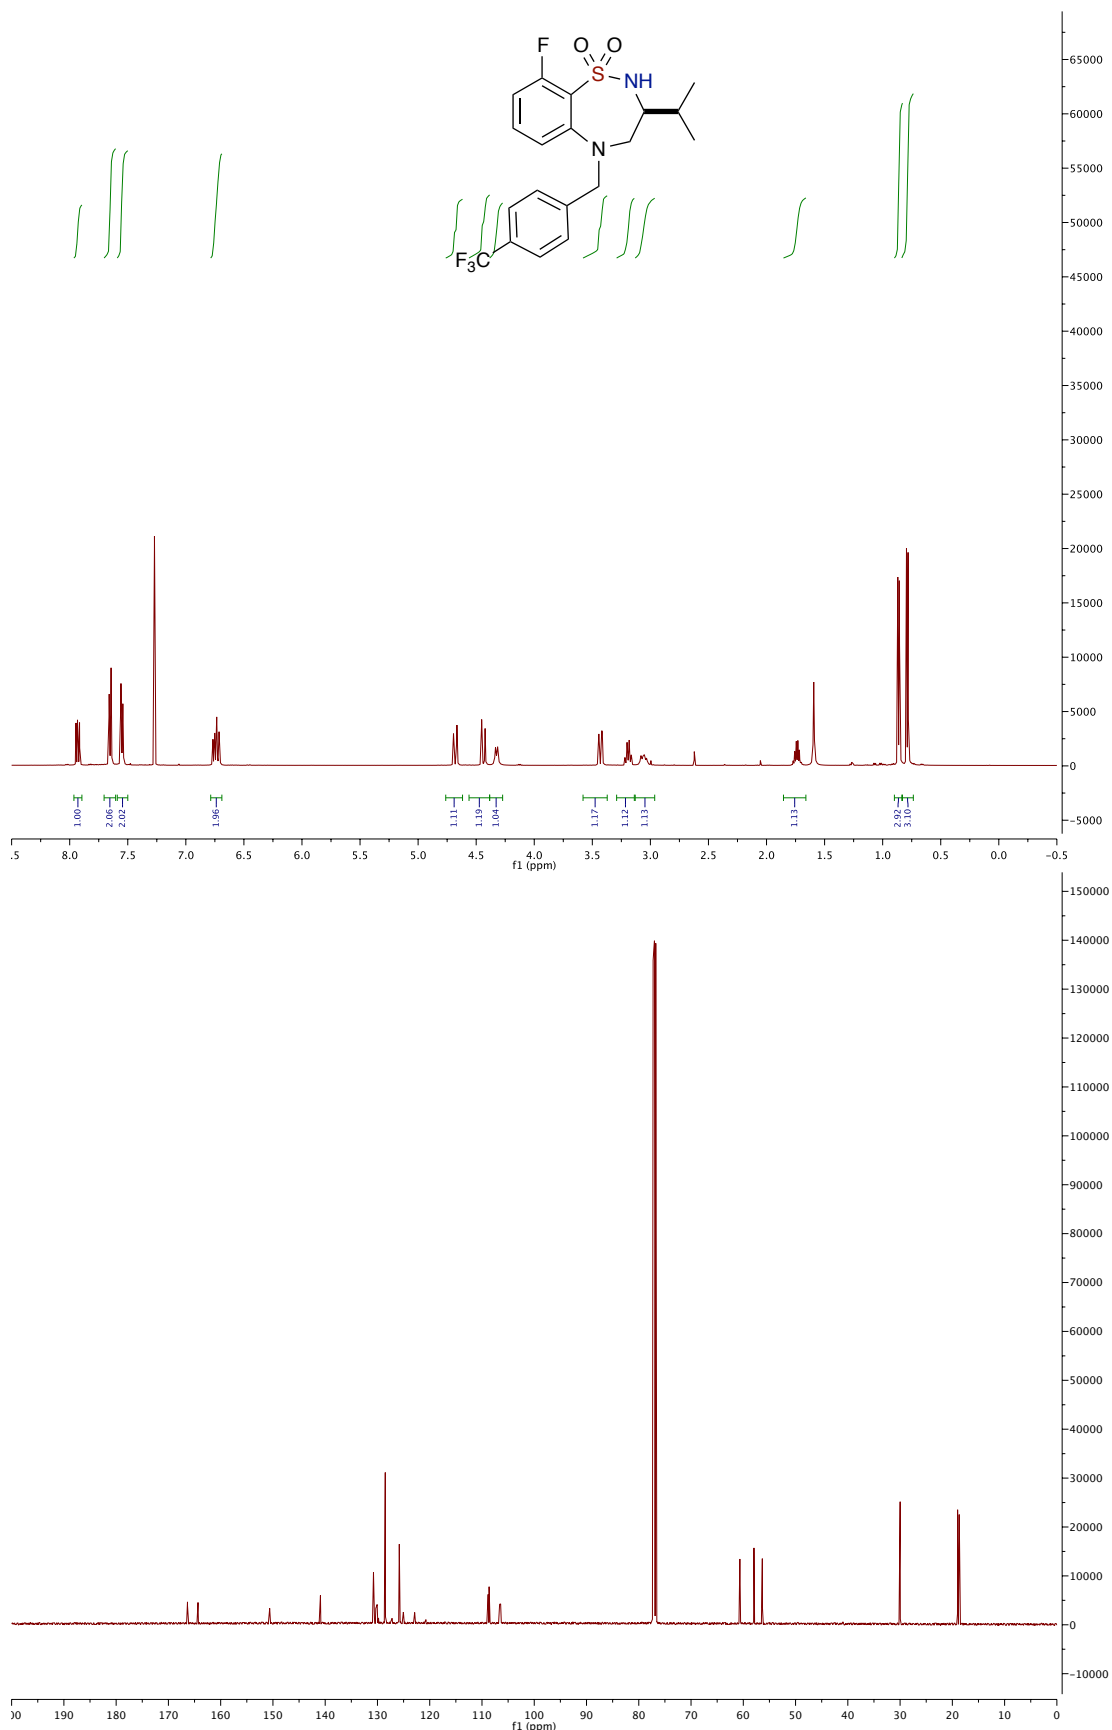

**(S)-3-isopropyl-7-methyl-5-(oxetan-3-yl)-2,3,4,5-tetrahydrobenzo[f][1,2,5]thiadiazepine 1,1-dioxide (10f)**

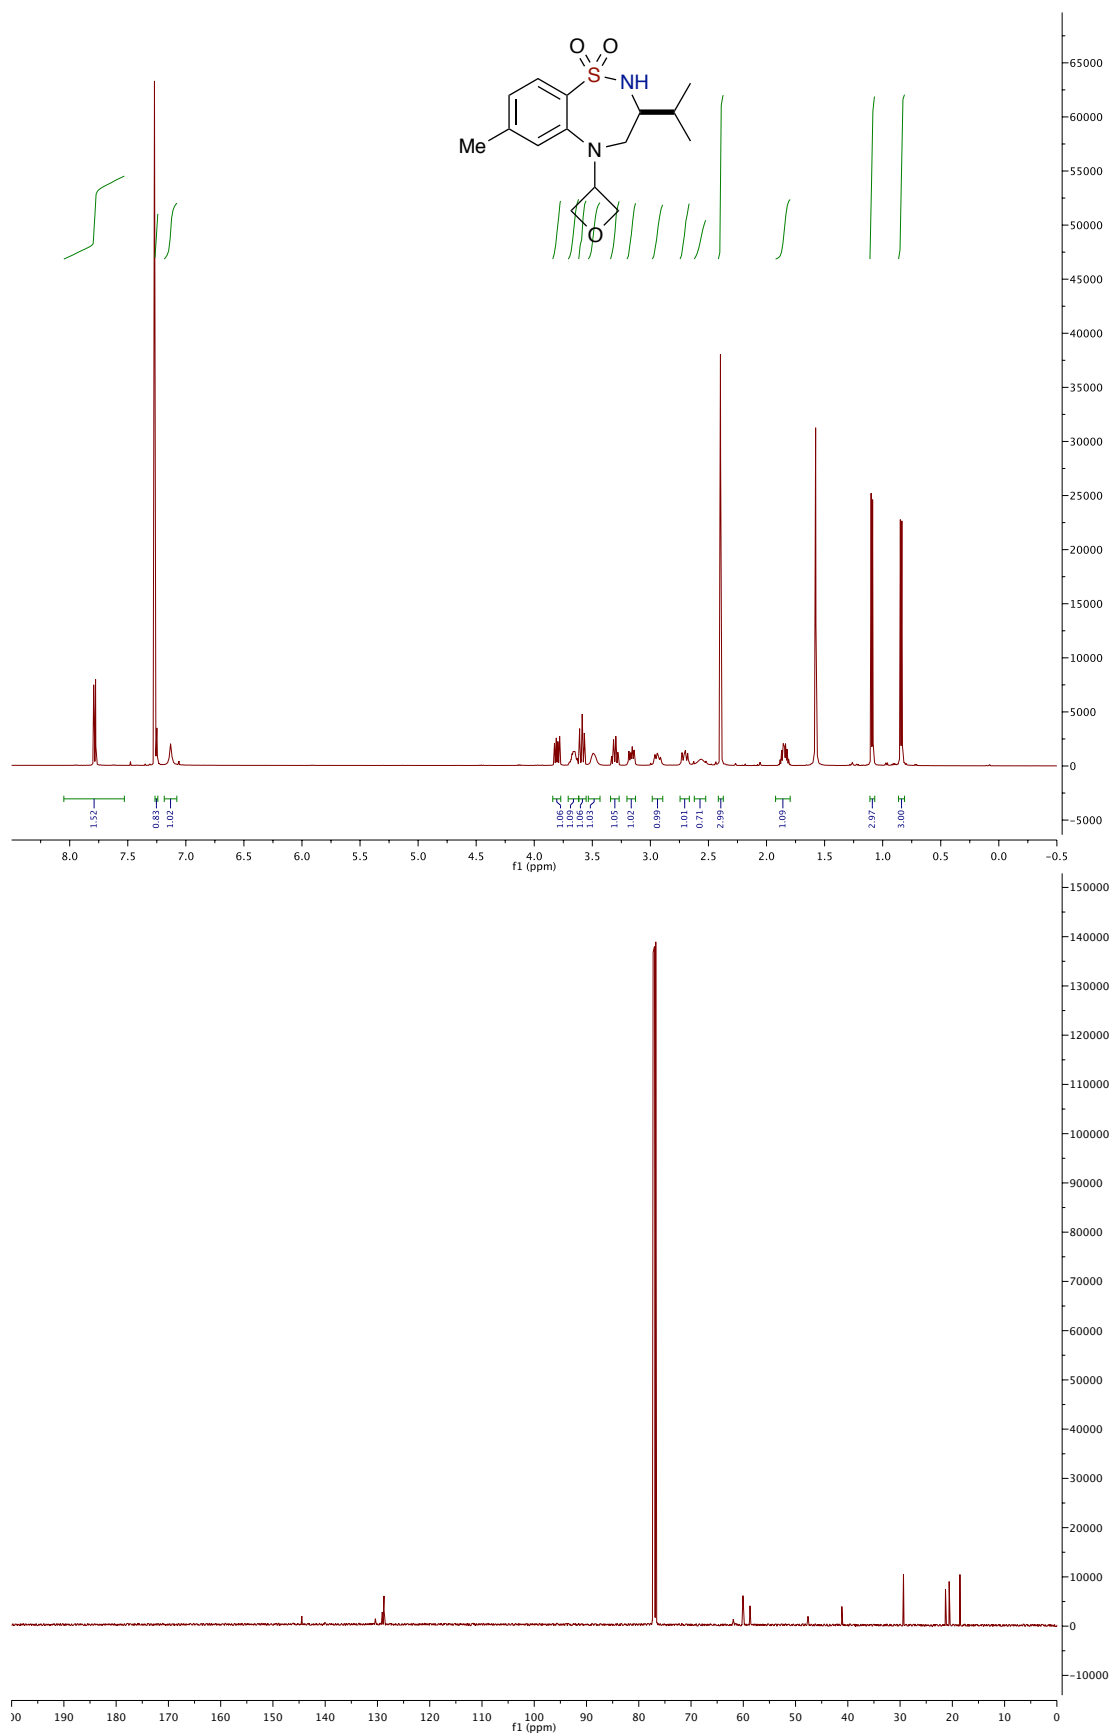

**(S)-9-fluoro-3-isopropyl-5-(3-methoxypropyl)-2,3,4,5-tetrahydrobenzo[f][1,2,5]thiadiazepine 1,1-dioxide (10g)**

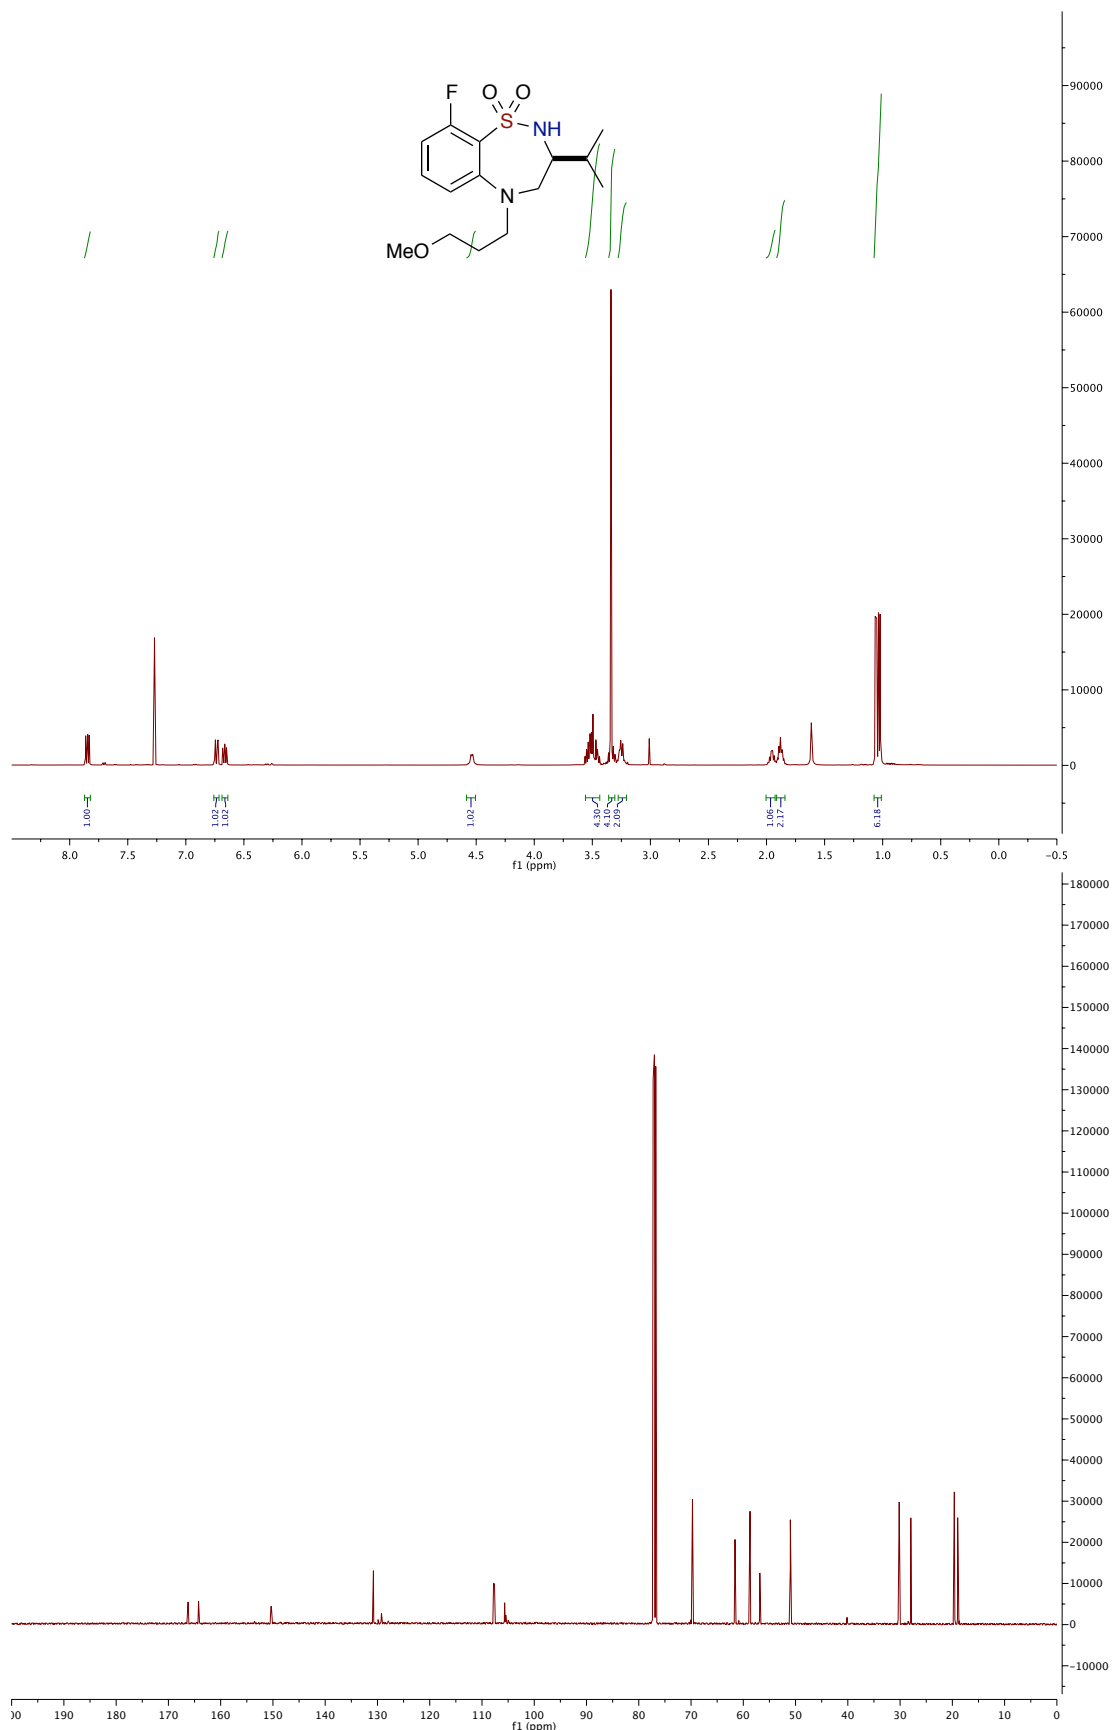

**(S)-3-((S)-sec-butyl)-8-chloro-5-(3-methoxypropyl)-2,3,4,5-tetrahydrobenzo[f][1,2,5]thiadiazepine 1,1-dioxide (10h)**

**1,1-**

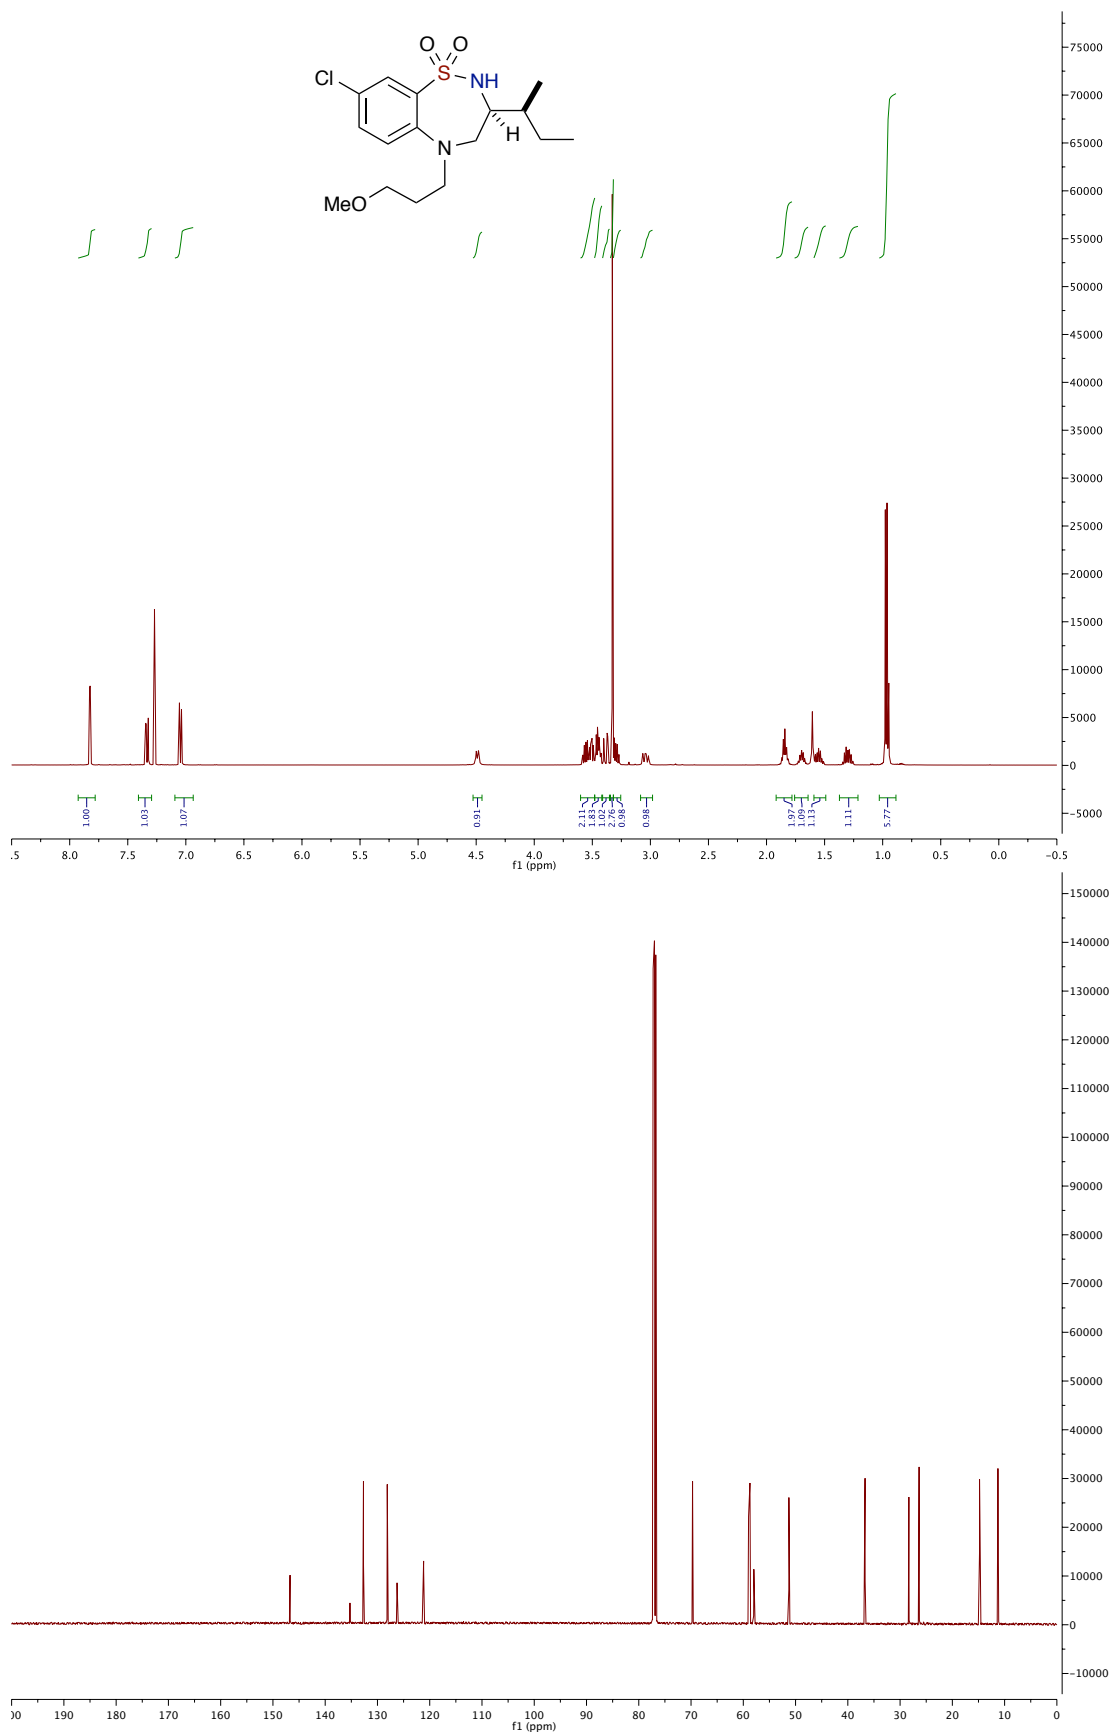

**9-fluoro-5-(3-methoxypropyl)-4,5-dihydro-2H-spiro[benzo[f][1,2,5]thiadiazepine-3,1'-cyclohexane] 1,1-dioxide (10i)**

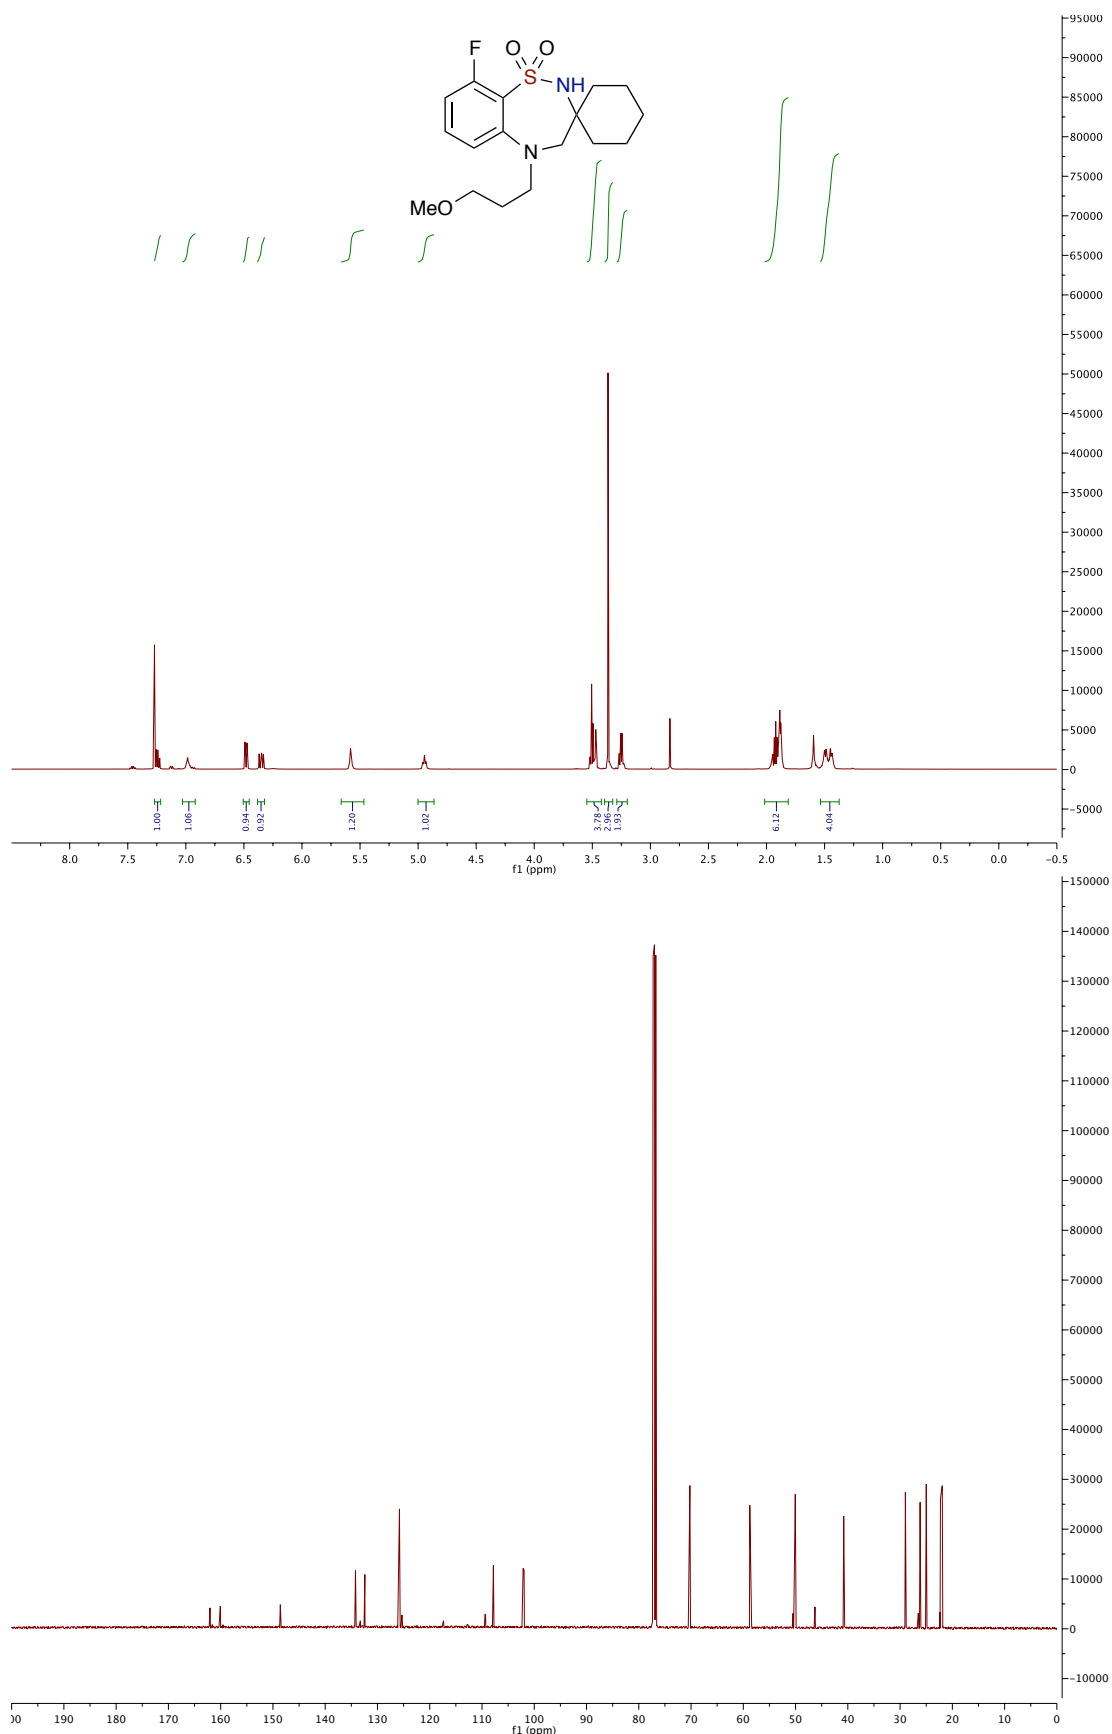



7-bromo-5-(2-hydroxyethyl)-4,5-dihydro-2H-spiro[benzo[f][1,2,5]thiadiazepine-3,1'-cyclohexane] 1,1-dioxide (10j)

1,1-

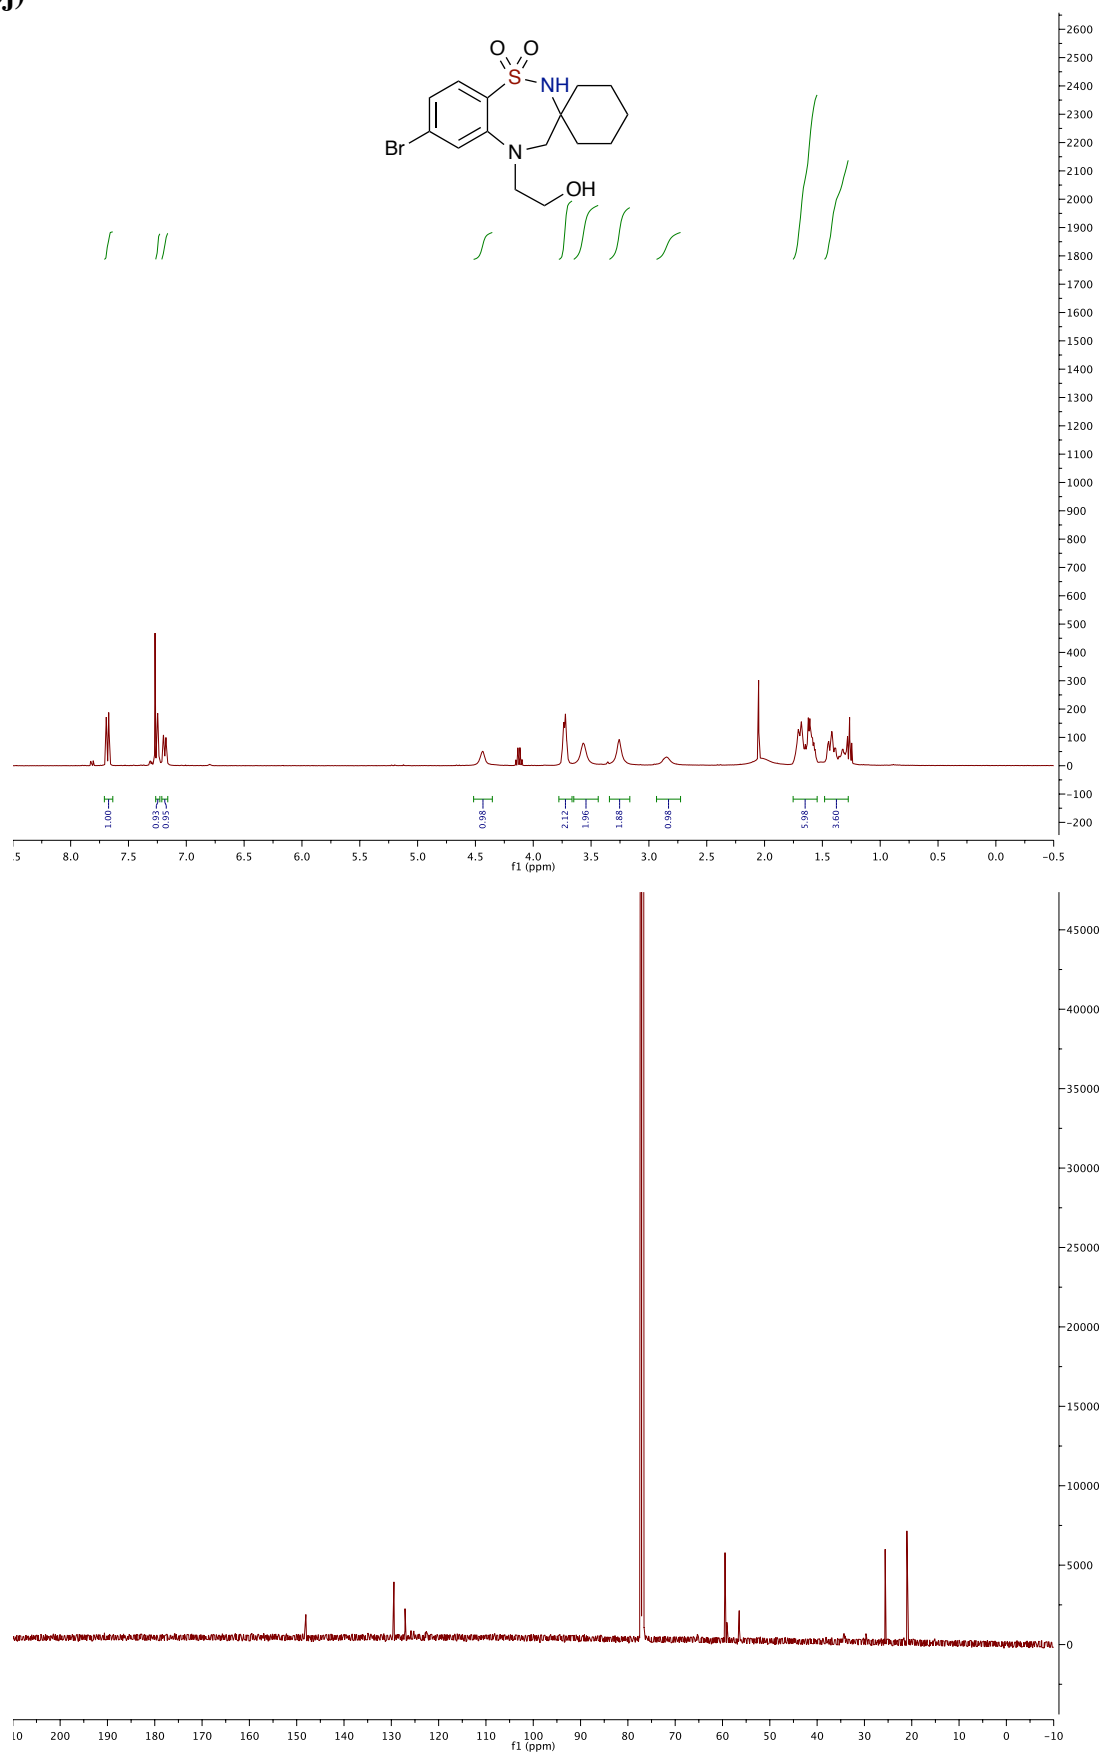

**(S)-7-bromo-5-(2-hydroxyethyl)-3-isopropyl-2,3,4,5-tetrahydrobenzo[*f*][1,2,5]thiadiazepine 1,1-dioxide (10k)**

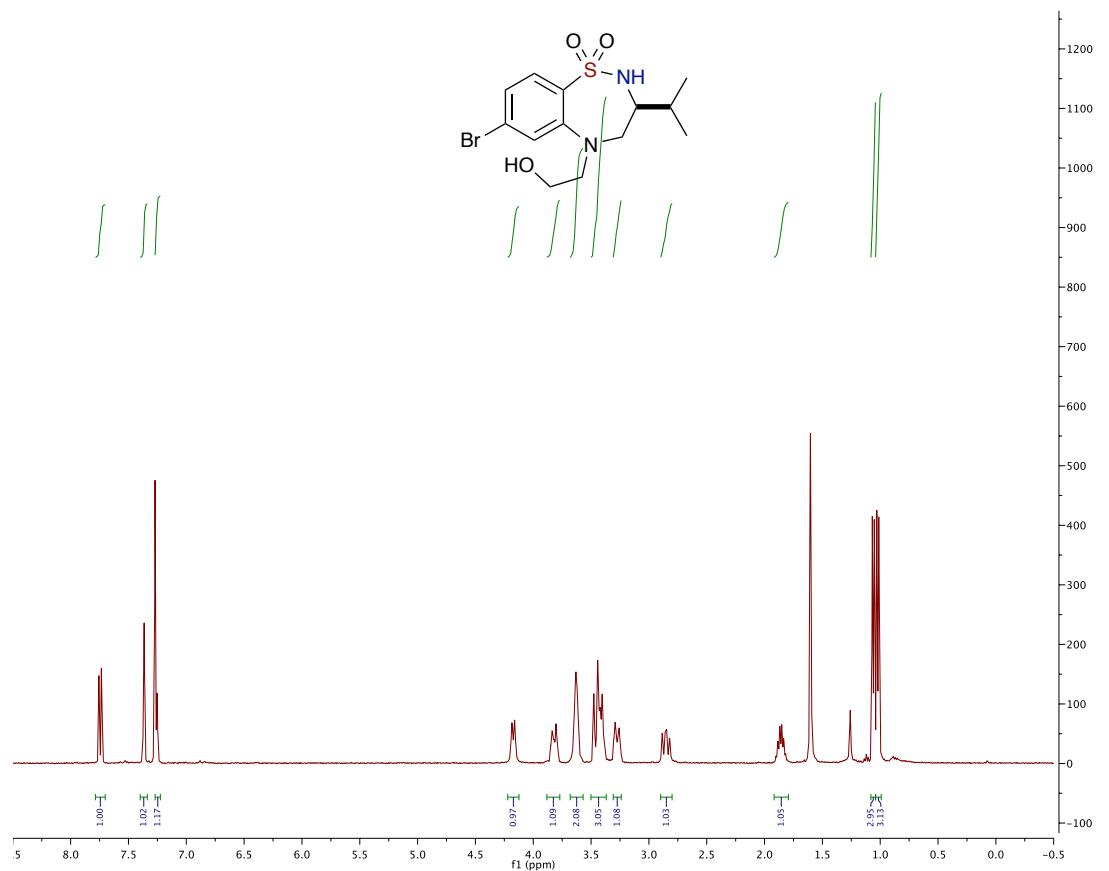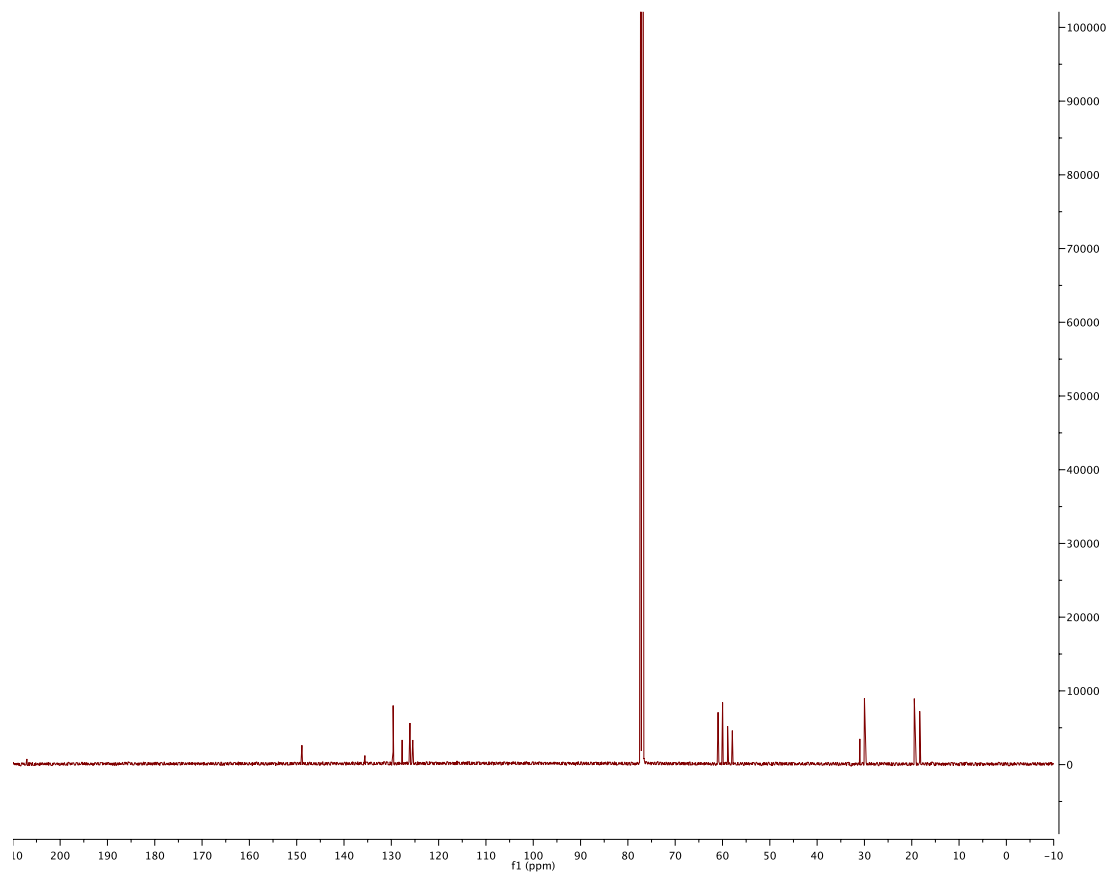

**(S)-7-bromo-5-(2-hydroxyethyl)-3-isobutyl-2,3,4,5-tetrahydrobenzo[f][1,2,5]thiadiazepine 1,1-dioxide (101)**

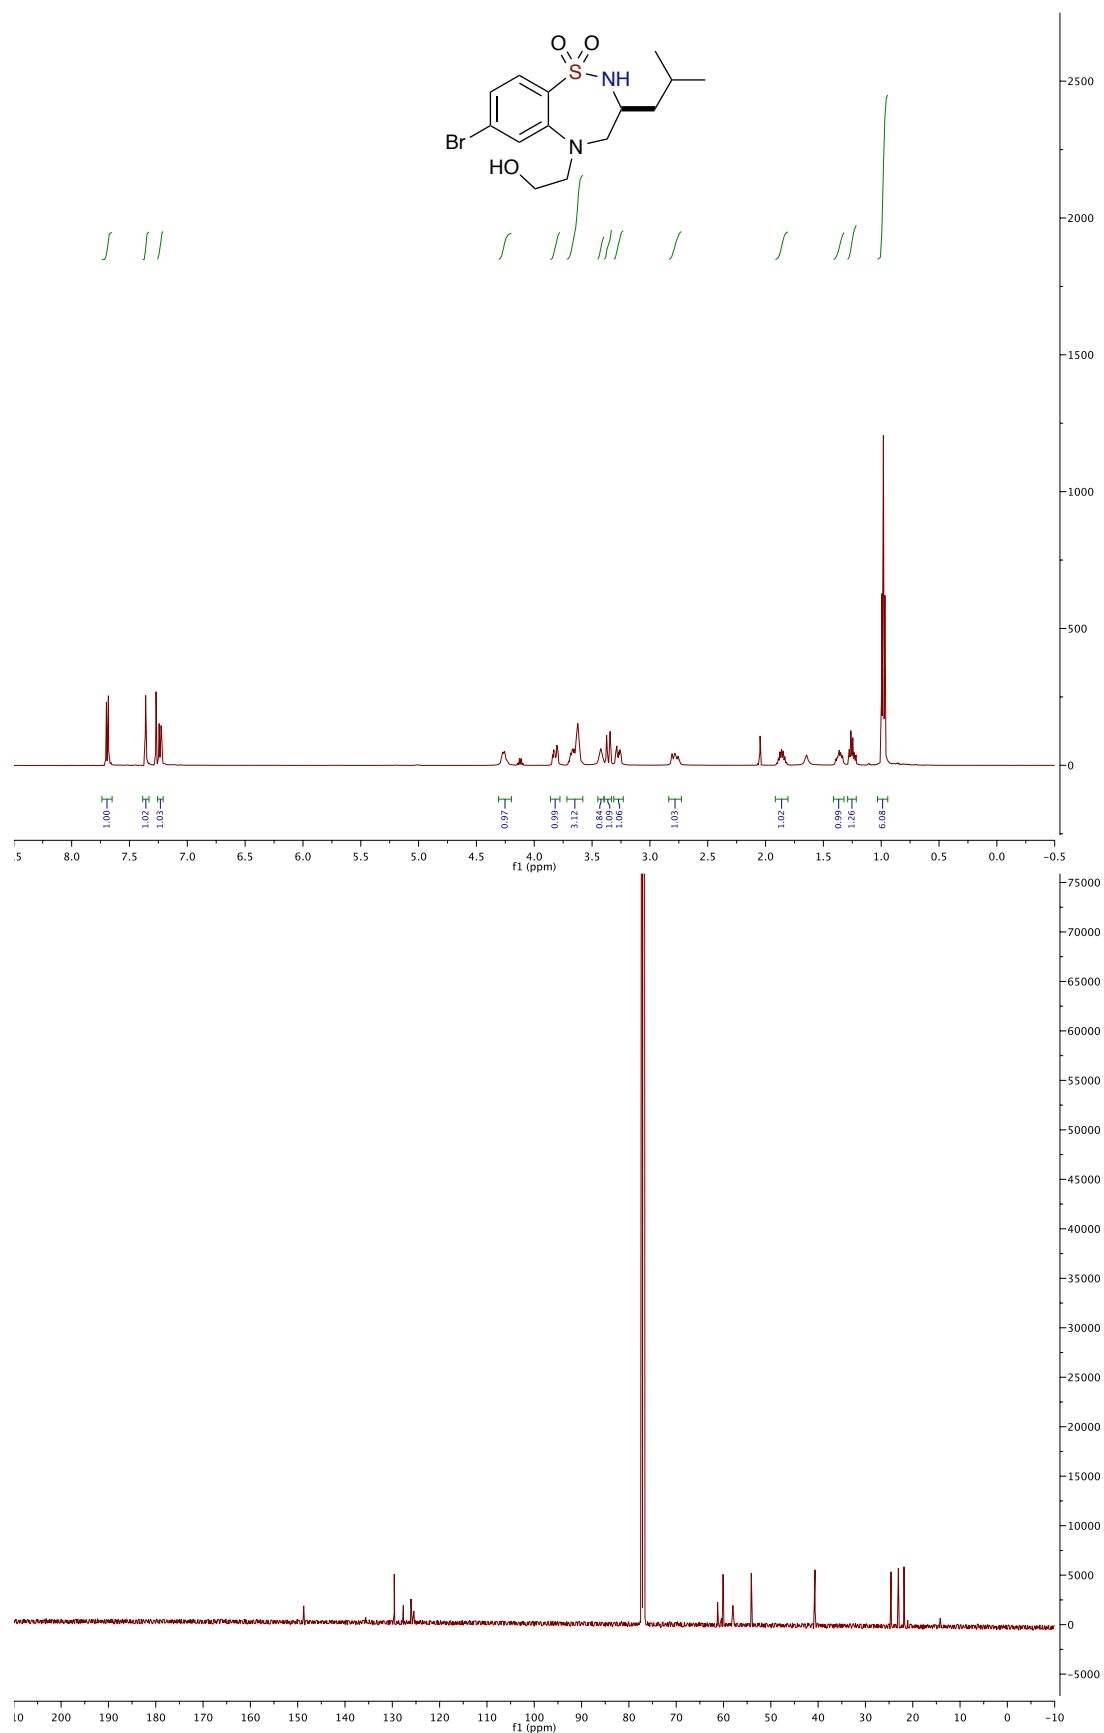

**(S)-7-bromo-5-((R)-1-hydroxypropan-2-yl)-3-isobutyl-2,3,4,5-tetrahydrobenzo[f][1,2,5]thiadiazepine 1,1-dioxide (10m)**

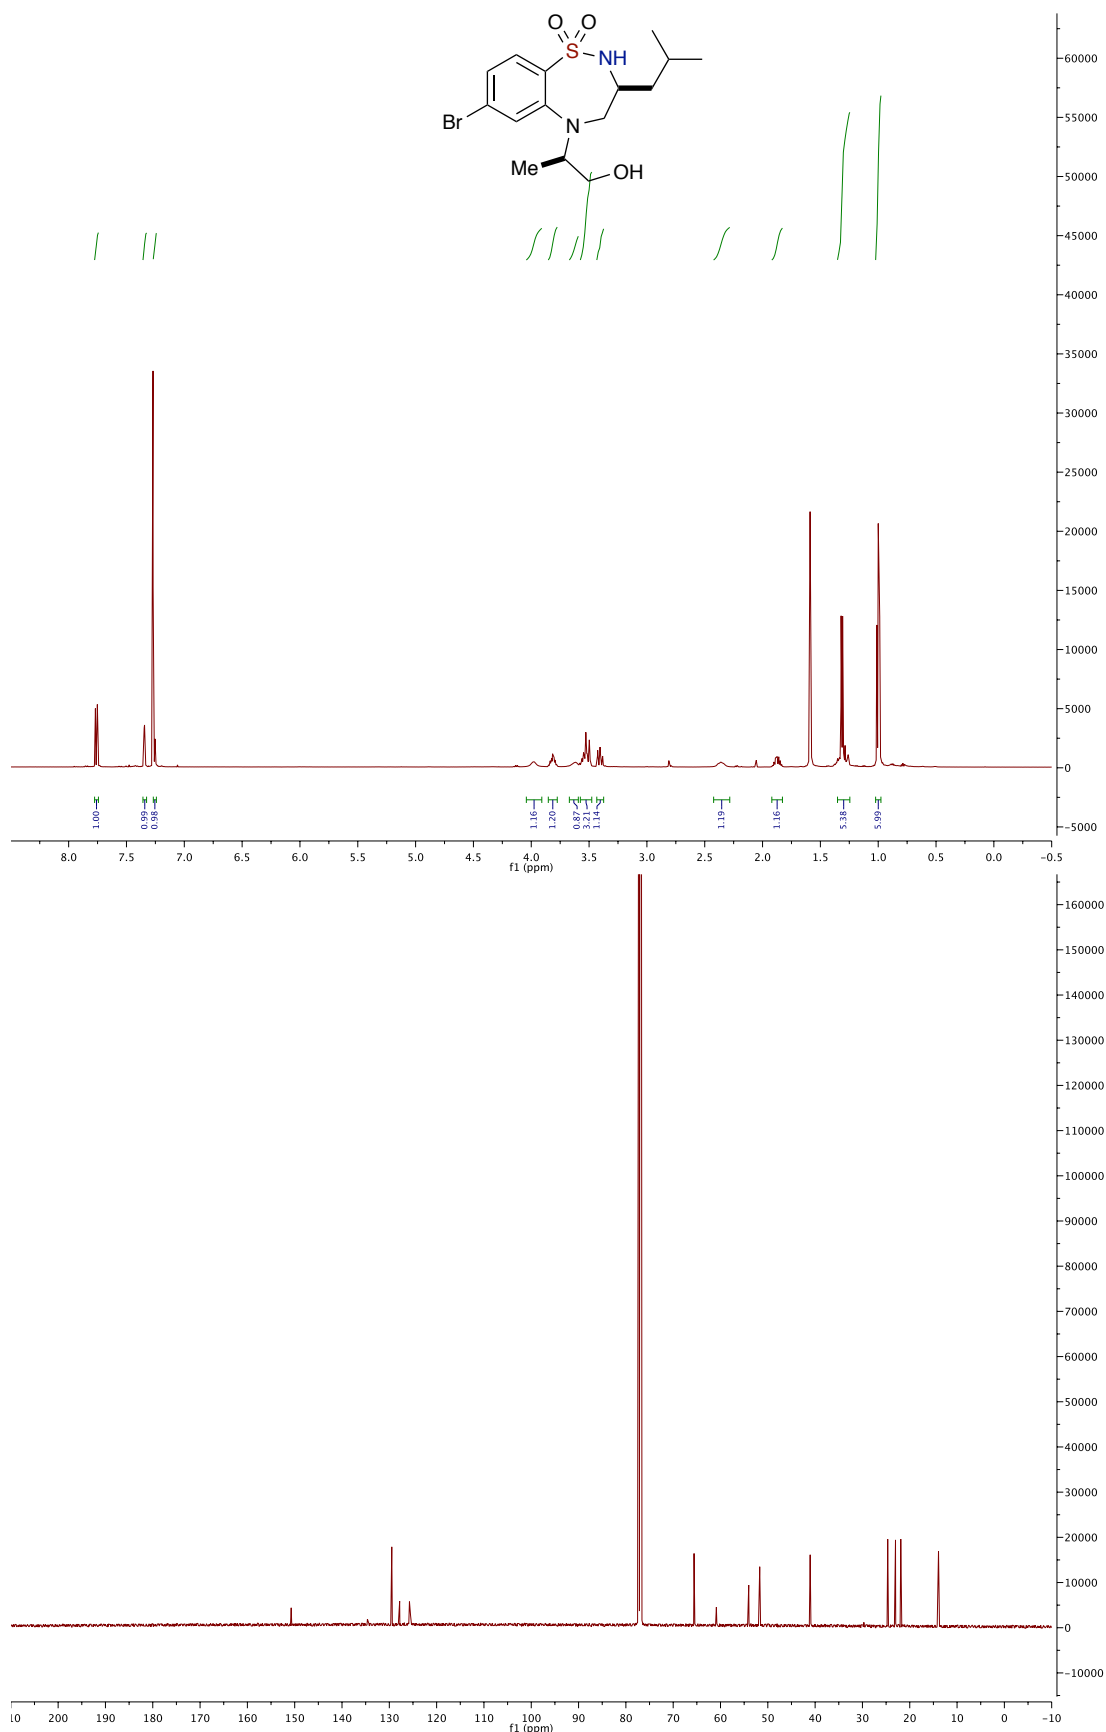

**Figure 4.** X-ray crystal structure of sultam **10m** where the thermal ellipsoids are set at a 50% probability level.

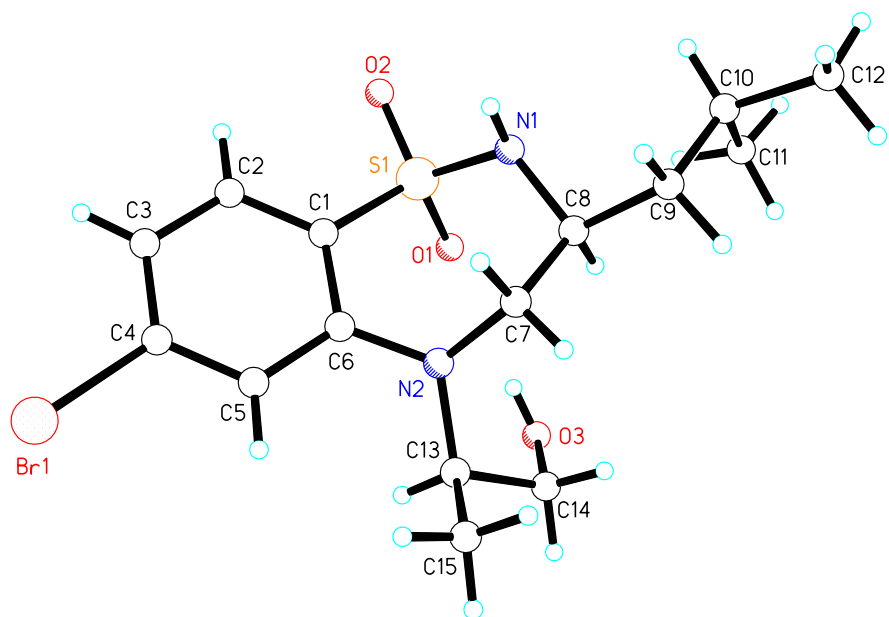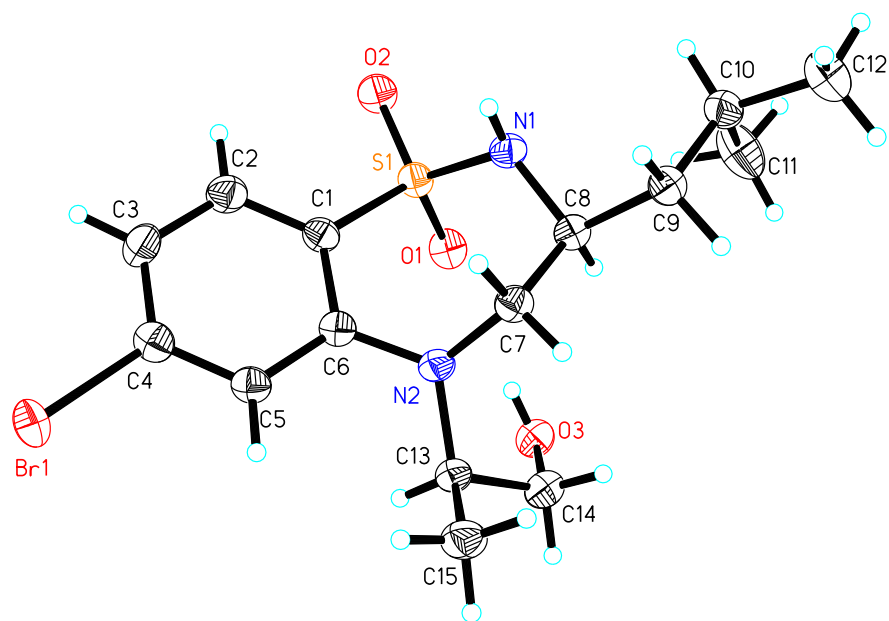



**(S)-7-bromo-5-(1-(hydroxymethyl)cyclohexyl)-3-isopropyl-2,3,4,5-tetrahydrobenzo[f][1,2,5]thiadiazepine 1,1-dioxide (10n)**

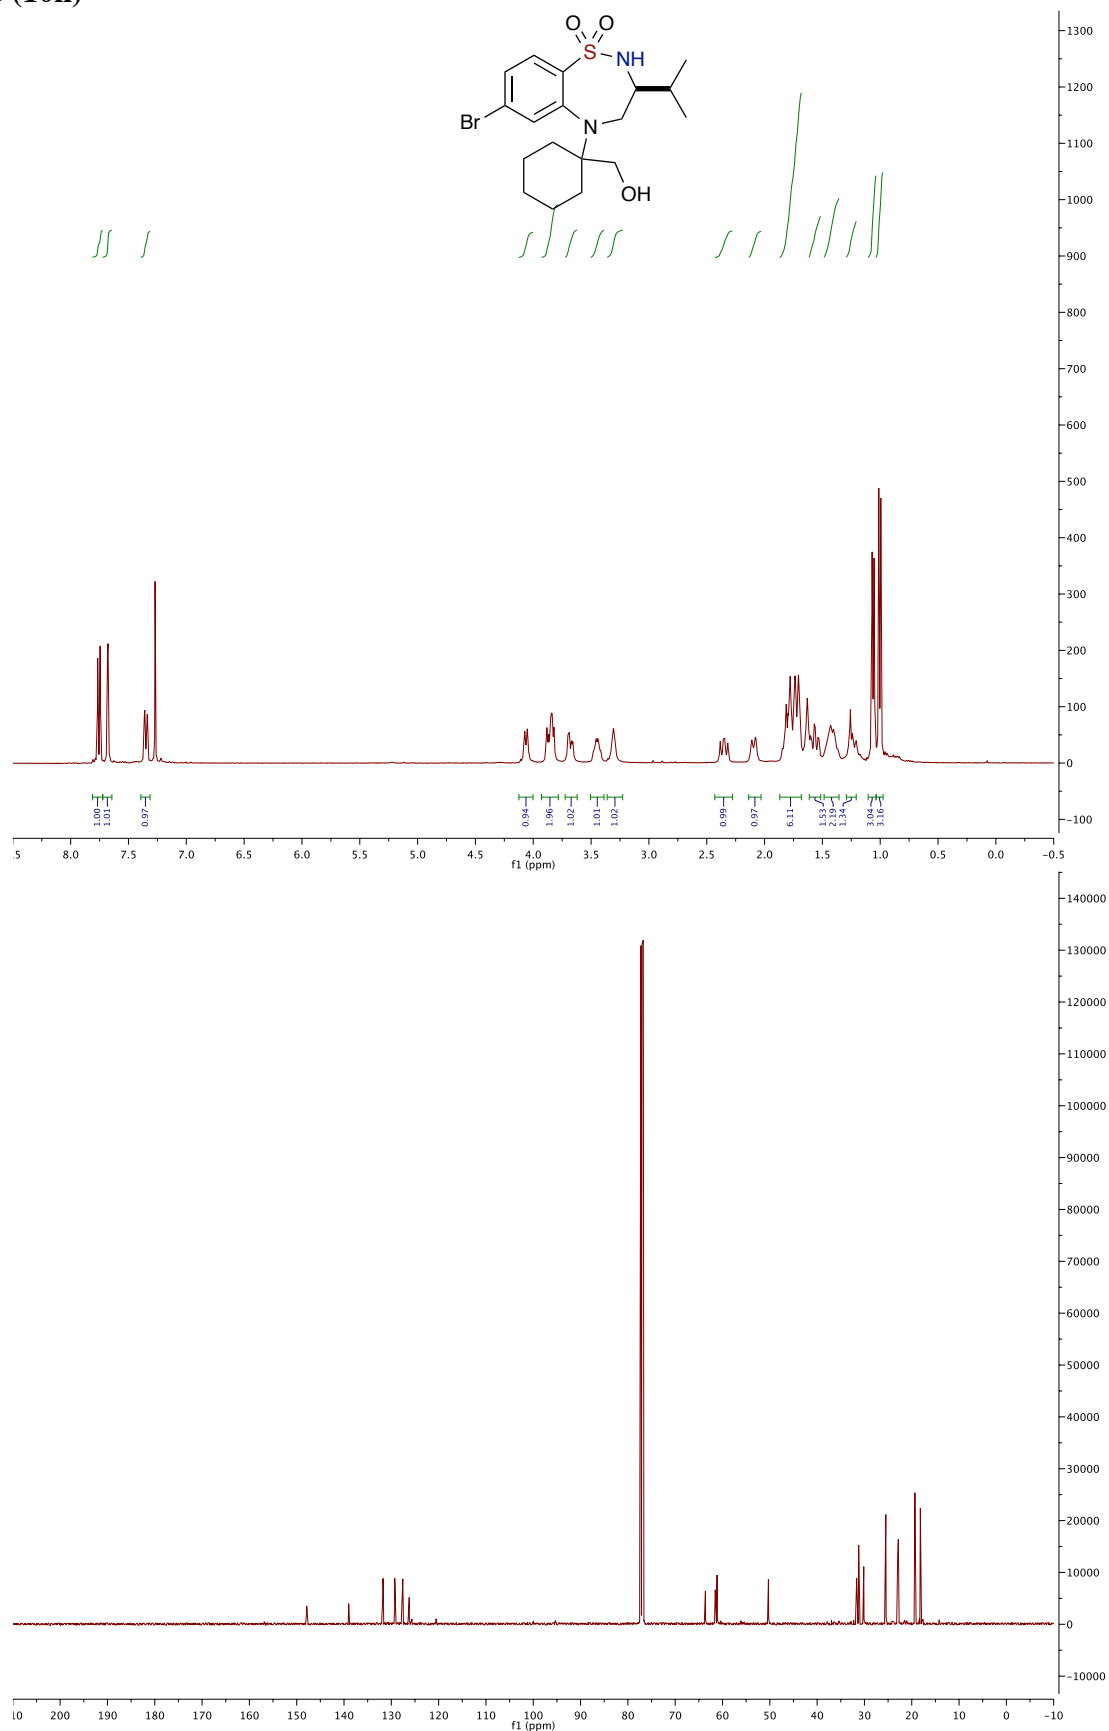

**(S)-7-bromo-5-((S)-1-hydroxy-4-methylpentan-2-yl)-3-isobutyl-2,3,4,5 tetrahydrobenzo[f][1,2,5]thiadiazepine 1,1-dioxide (10o)**

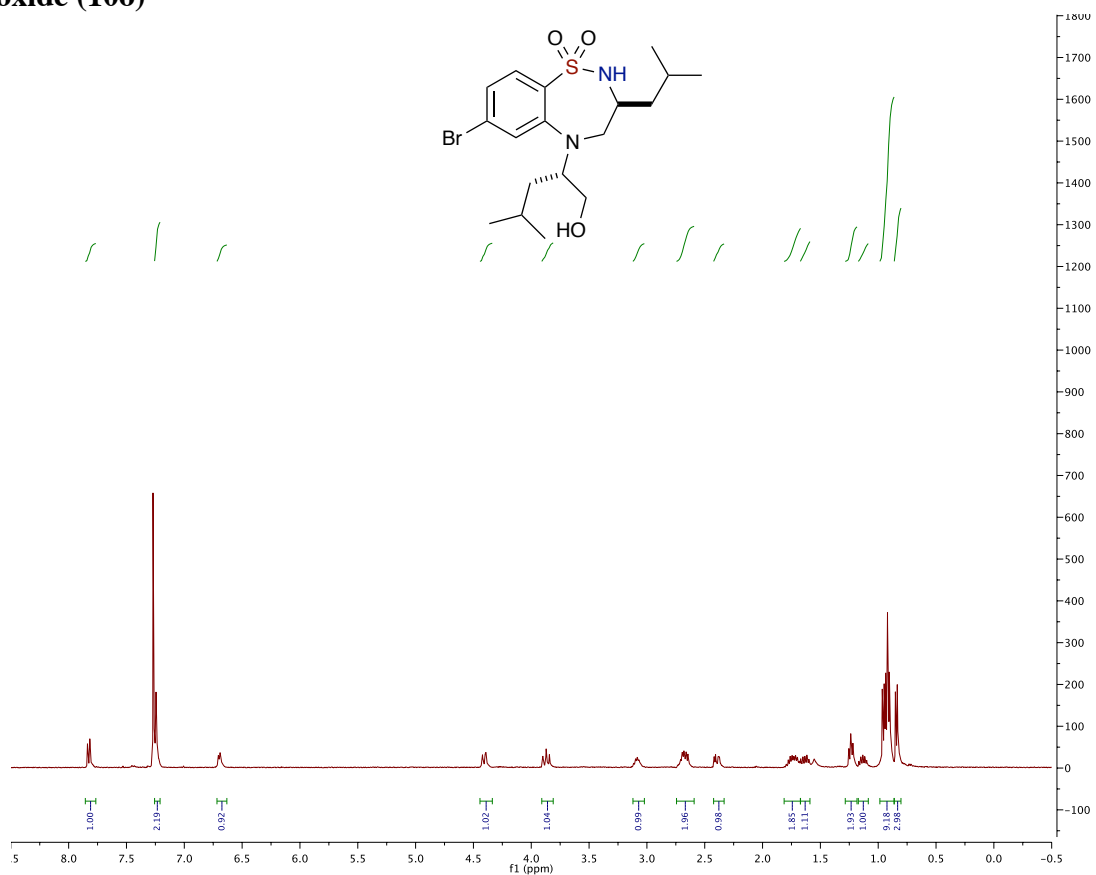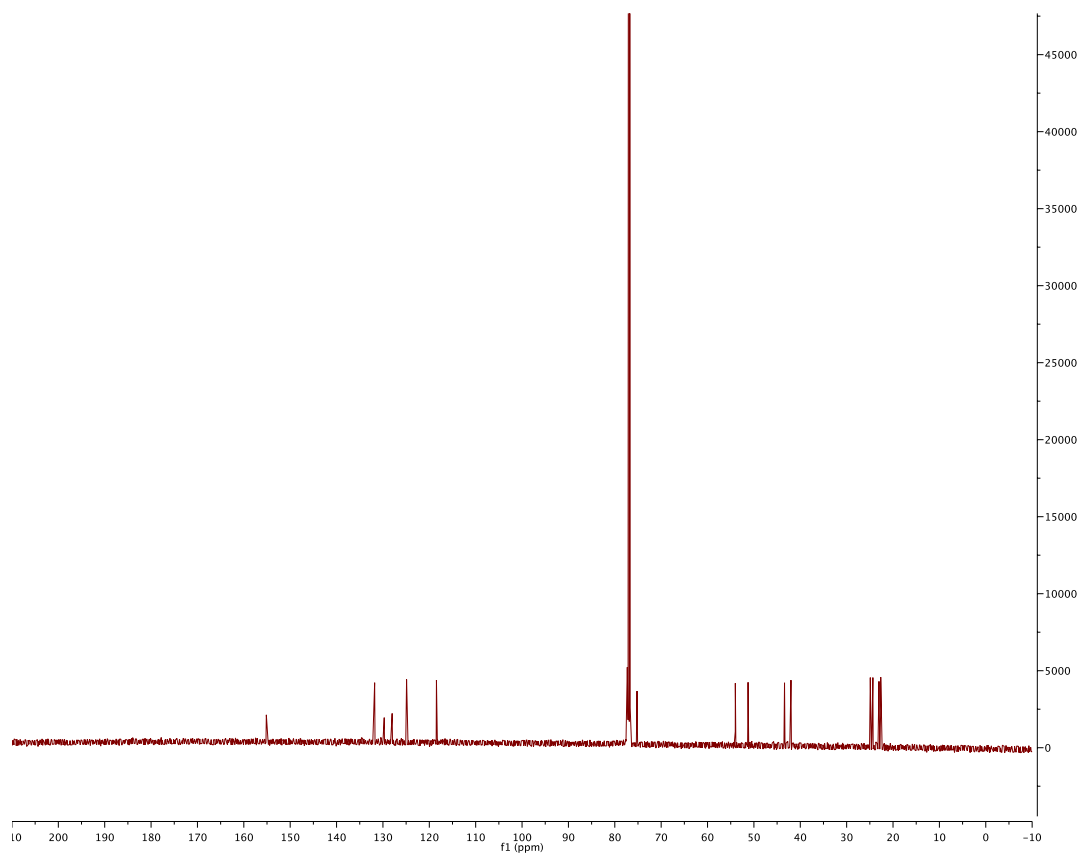



**(S)-7-bromo-5-((R)-4-hydroxy-3-methylbutyl)-3-isobutyl-2,3,4,5-tetrahydrobenzo[f][1,2,5]thiadiazepine 1,1-dioxide (10p)**

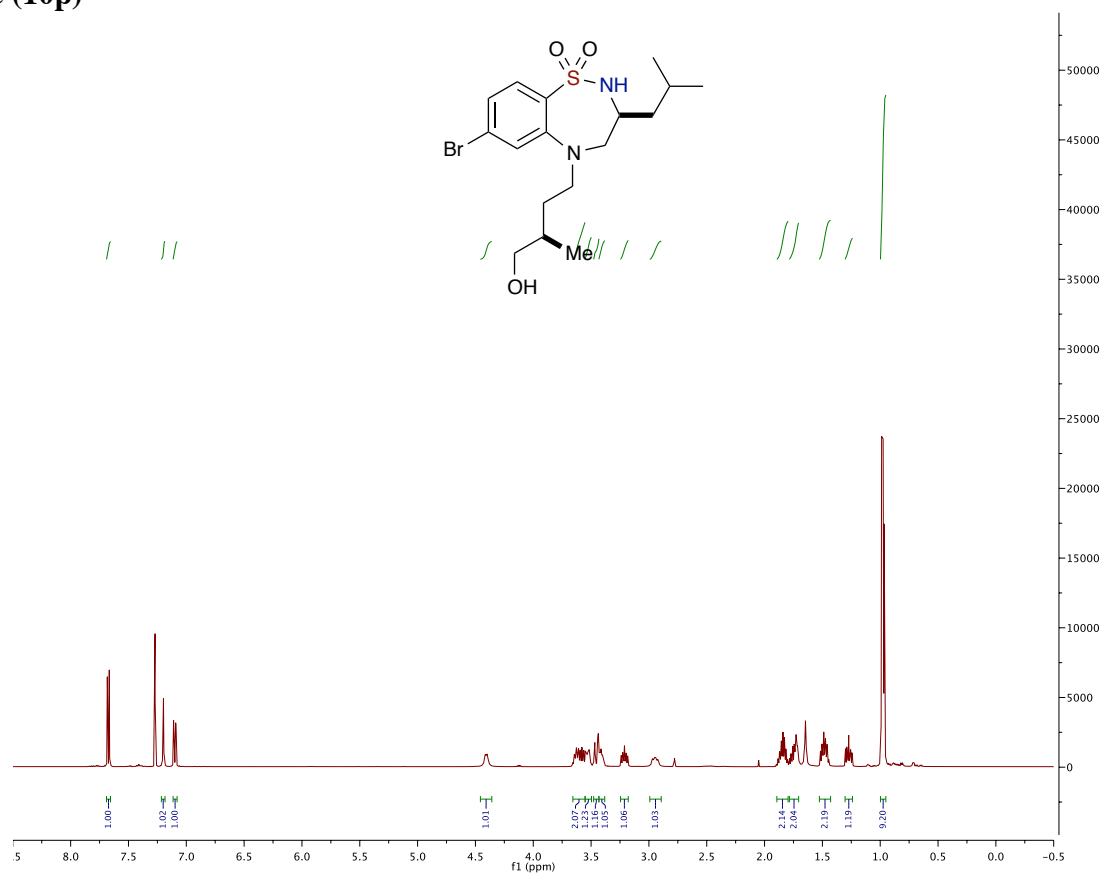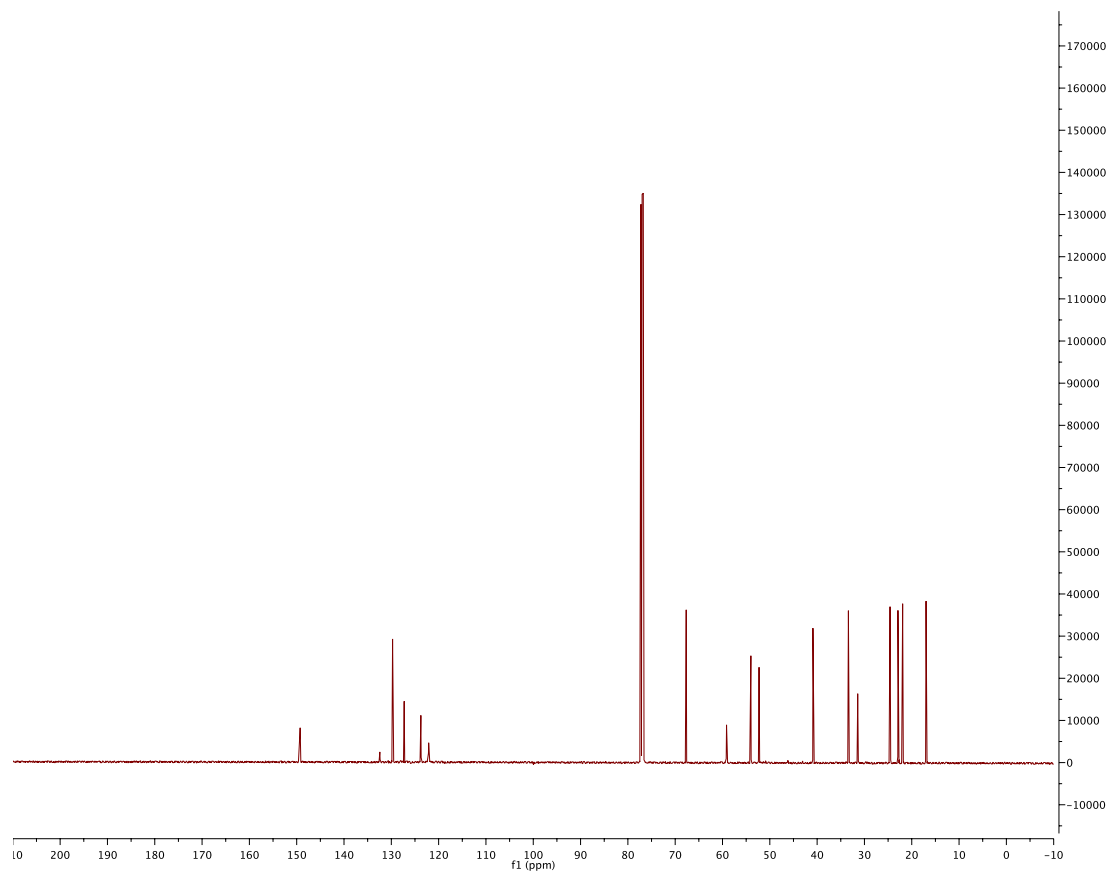

**(3S)-7-bromo-3-isobutyl-3,4-dihydro-2,5-ethanobenzo[*f*][1,2,5]thiadiazepine 1,1-dioxide (11a)**

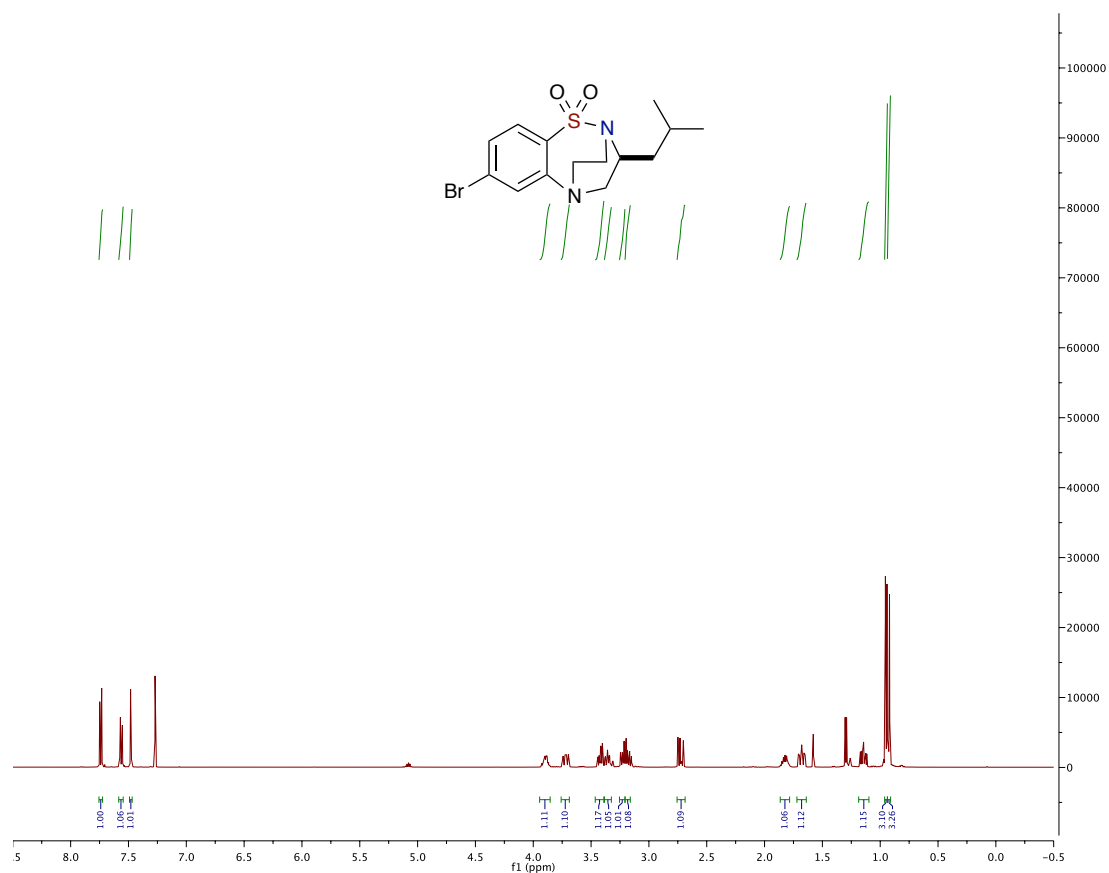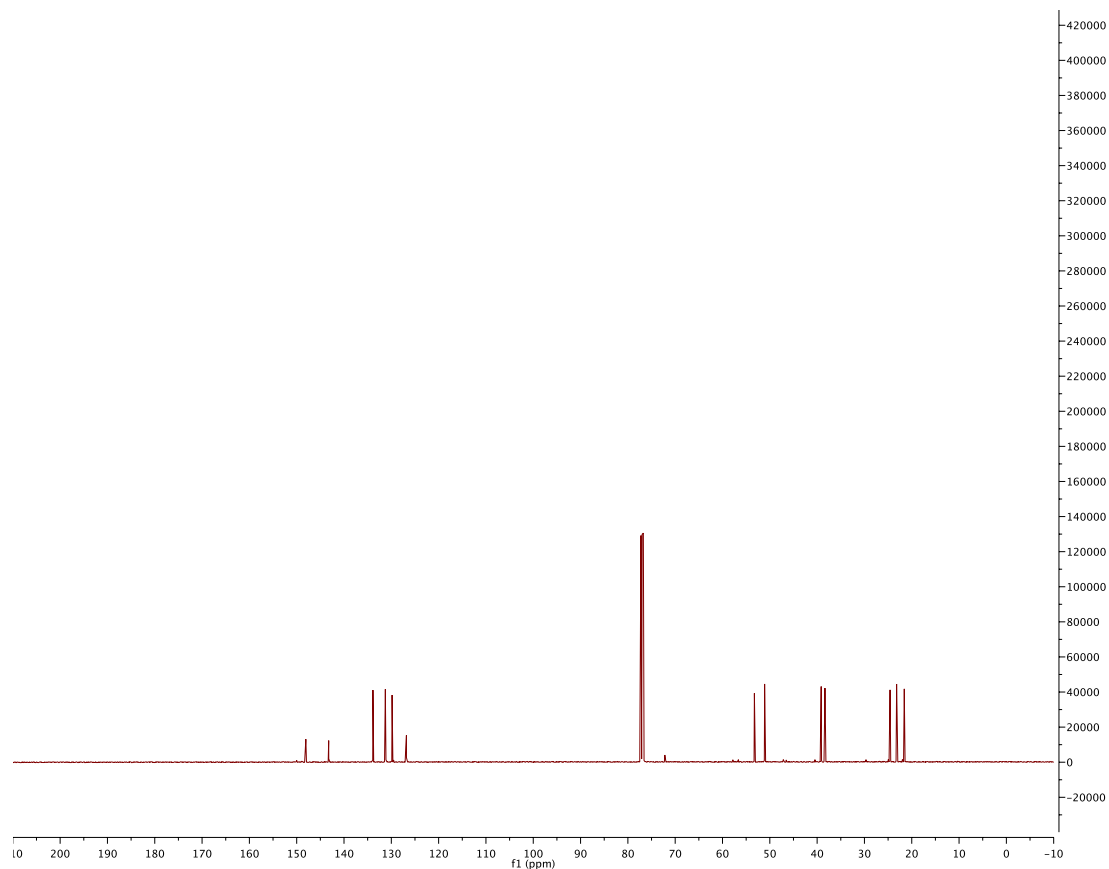

**(4*R*,11*S*)-7-bromo-11-isobutyl-4-methyl-3,4-dihydro-2,5-ethanobenzo[*f*][1,2,5]thiadiazepine 1,1-dioxide (11b)**

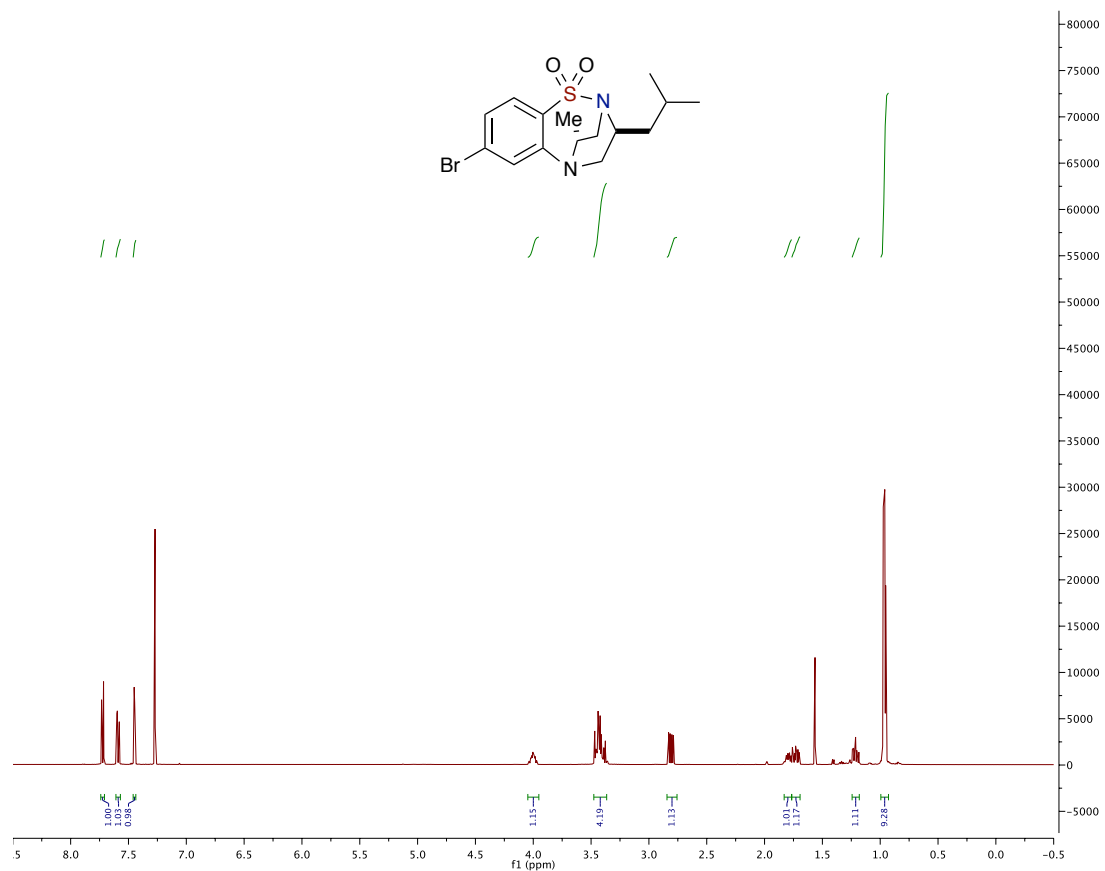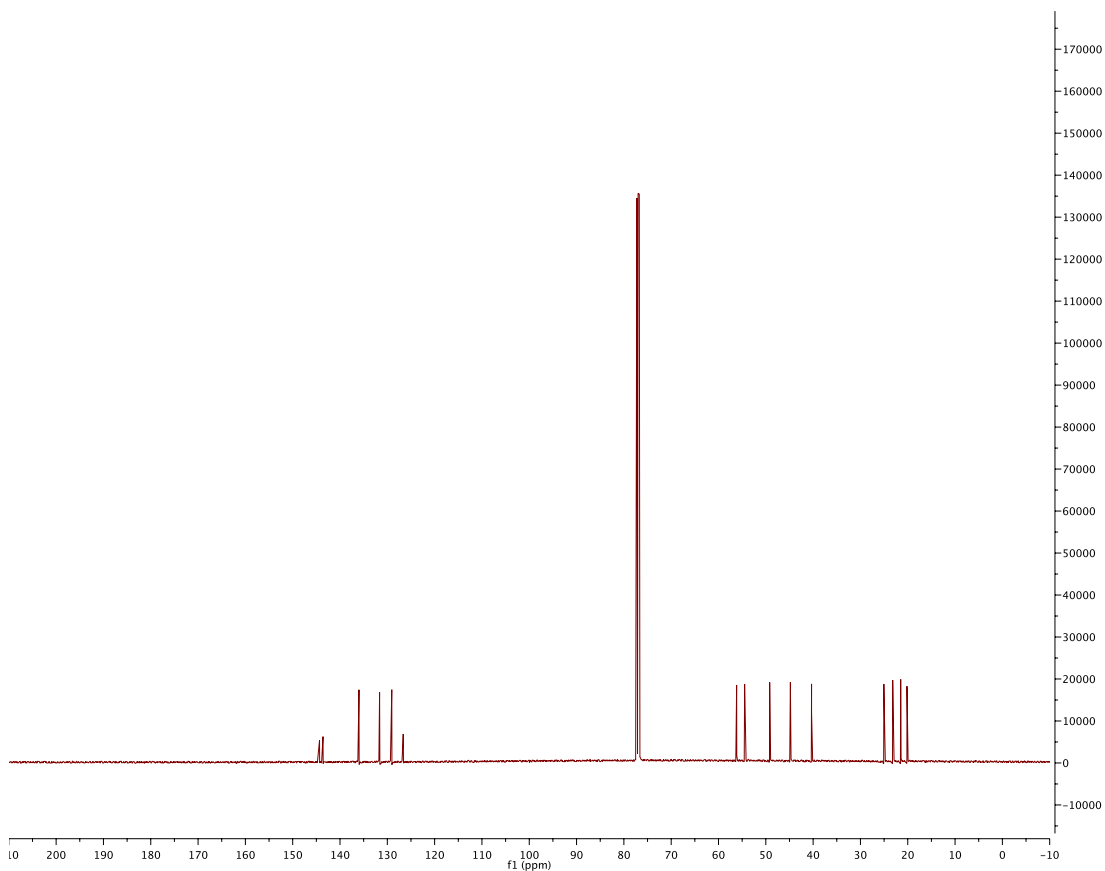

**7-bromo-4H-spiro[2,5-ethanobenzo[f][1,2,5]thiadiazepine-3,1'-cyclohexane] 1,1-dioxide (11c)**

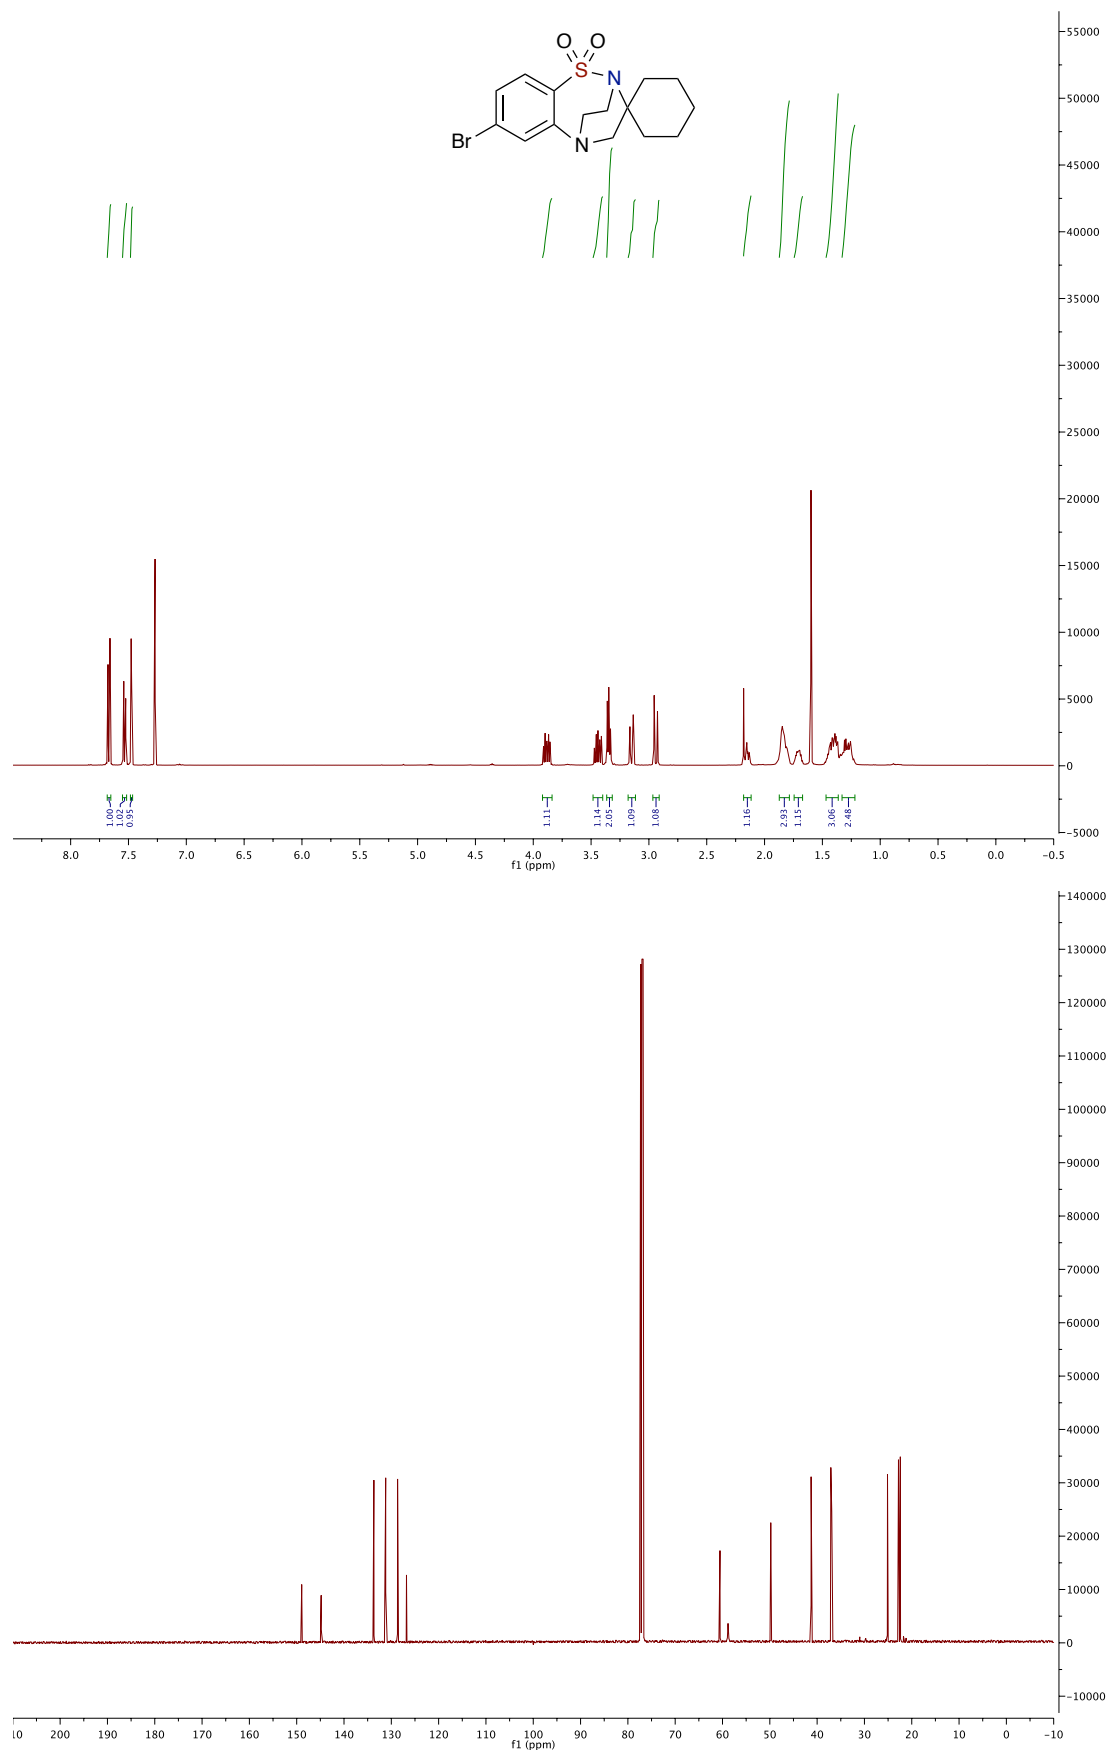

**Figure 5.** X-ray crystal structure of sultam **11c** where the thermal ellipsoids are set at a 50% probability level.

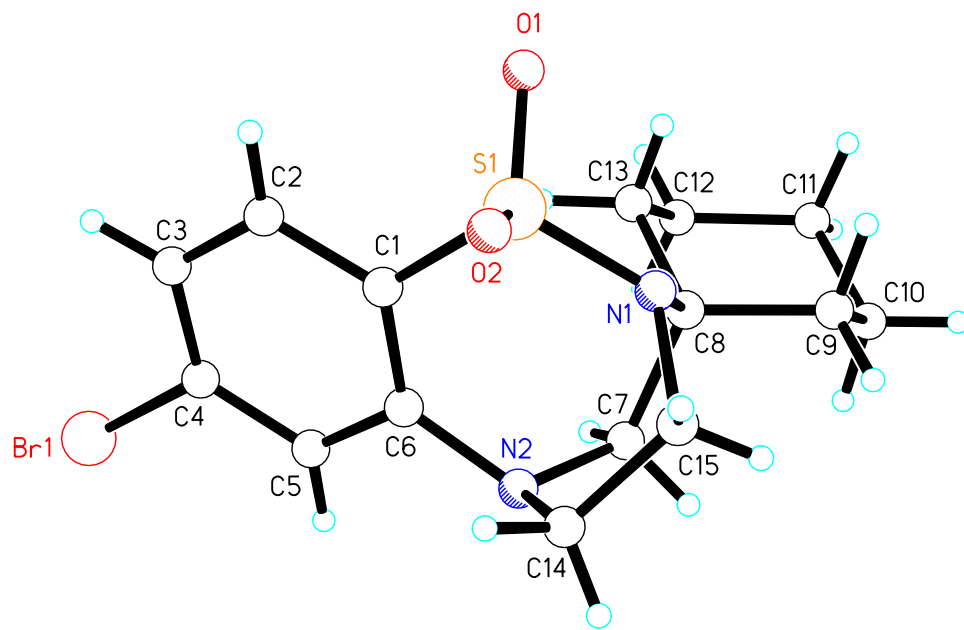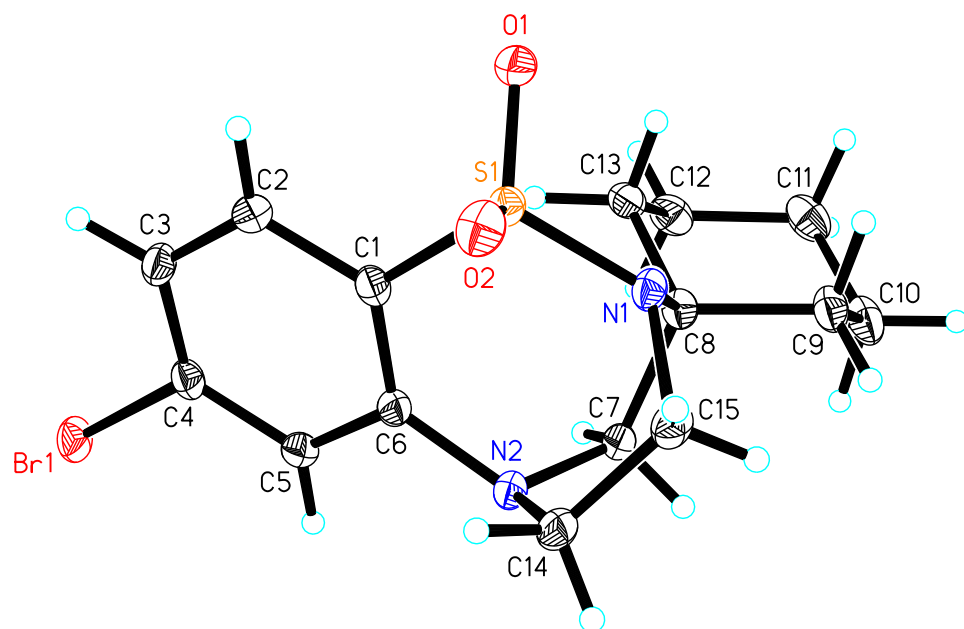

**(3*S*,7*R*)-7-((benzyloxy)methyl)-10-fluoro-5-((*R*)-1-hydroxypropan-2-yl)-3-isobutyl-2,3,4,5,6,7hexahydrobenzo[*b*][1,4,5,8]oxathiadiazecine 1,1-dioxide (18)**

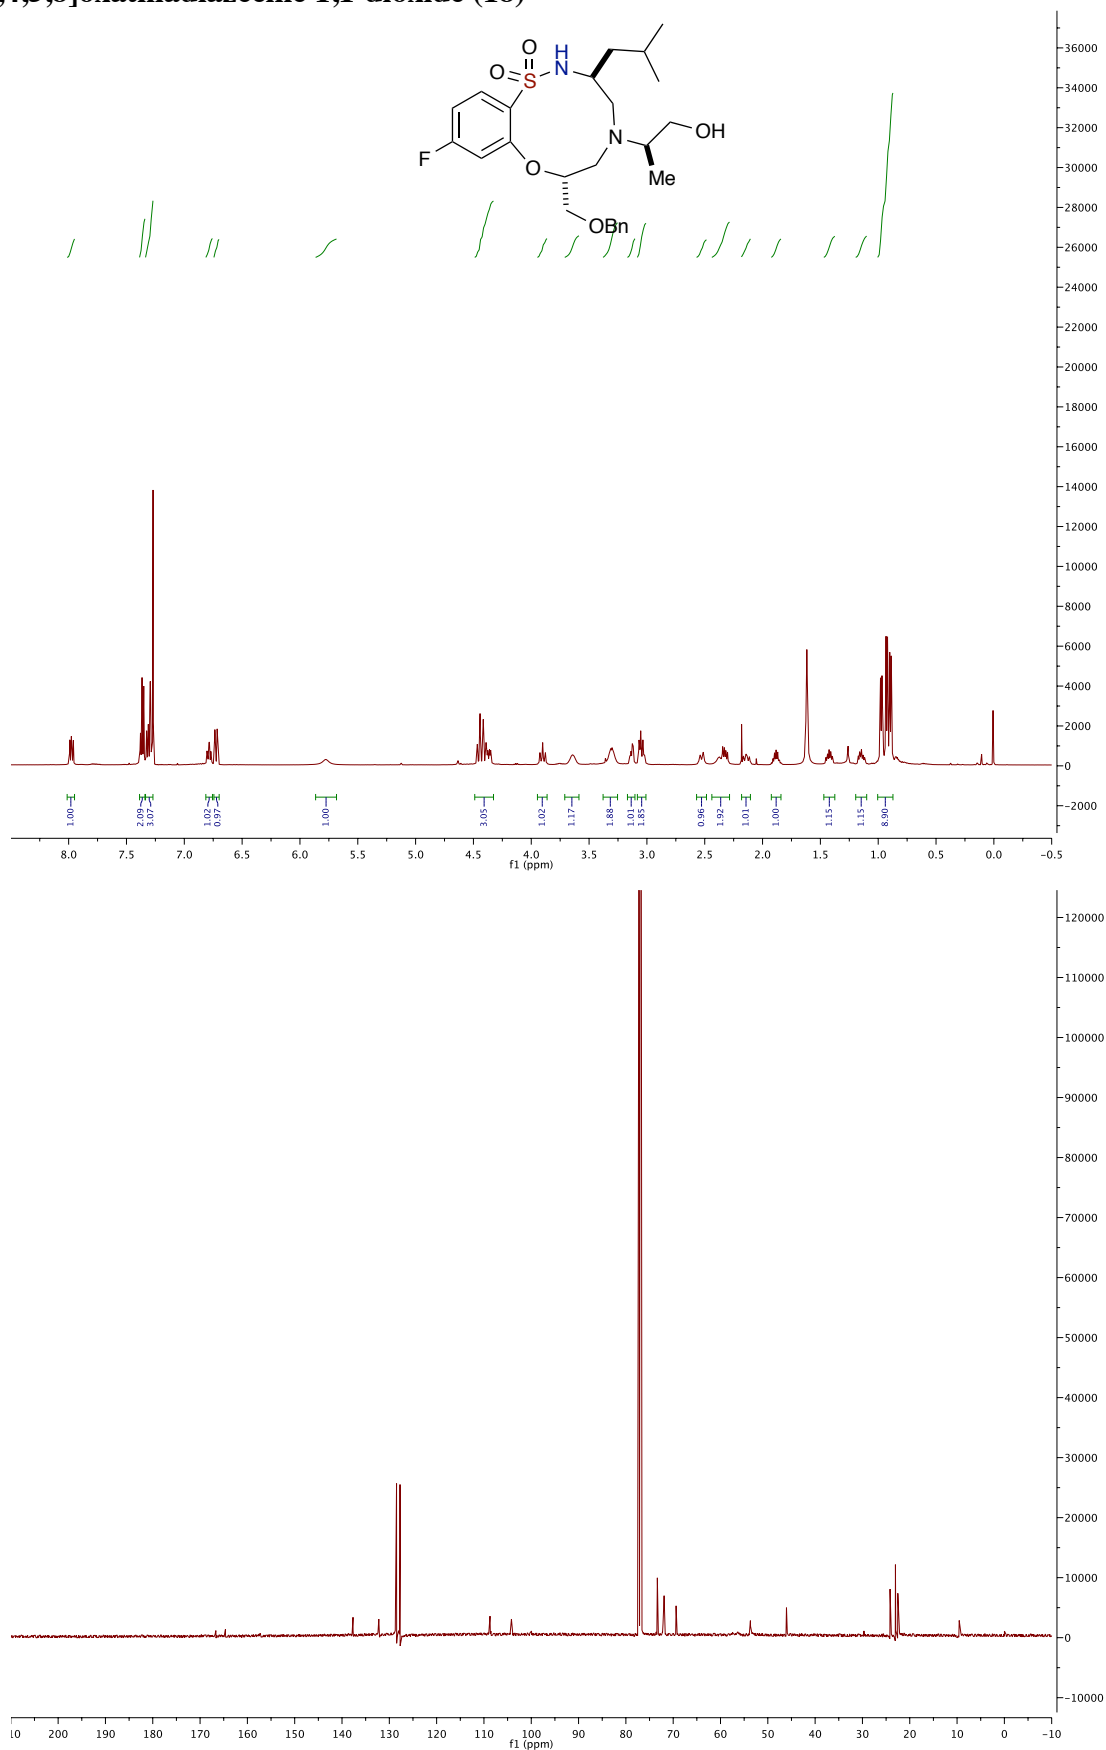

**(3*S*,7*S*)-7-((benzyloxy)methyl)-10-fluoro-5-((*R*)-1-hydroxypropan-2-yl)-3-isobutyl-2,3,4,5,6,7hexahydrobenzo[*b*][1,4,5,8]oxathiadiazecine 1,1-dioxide (19)**

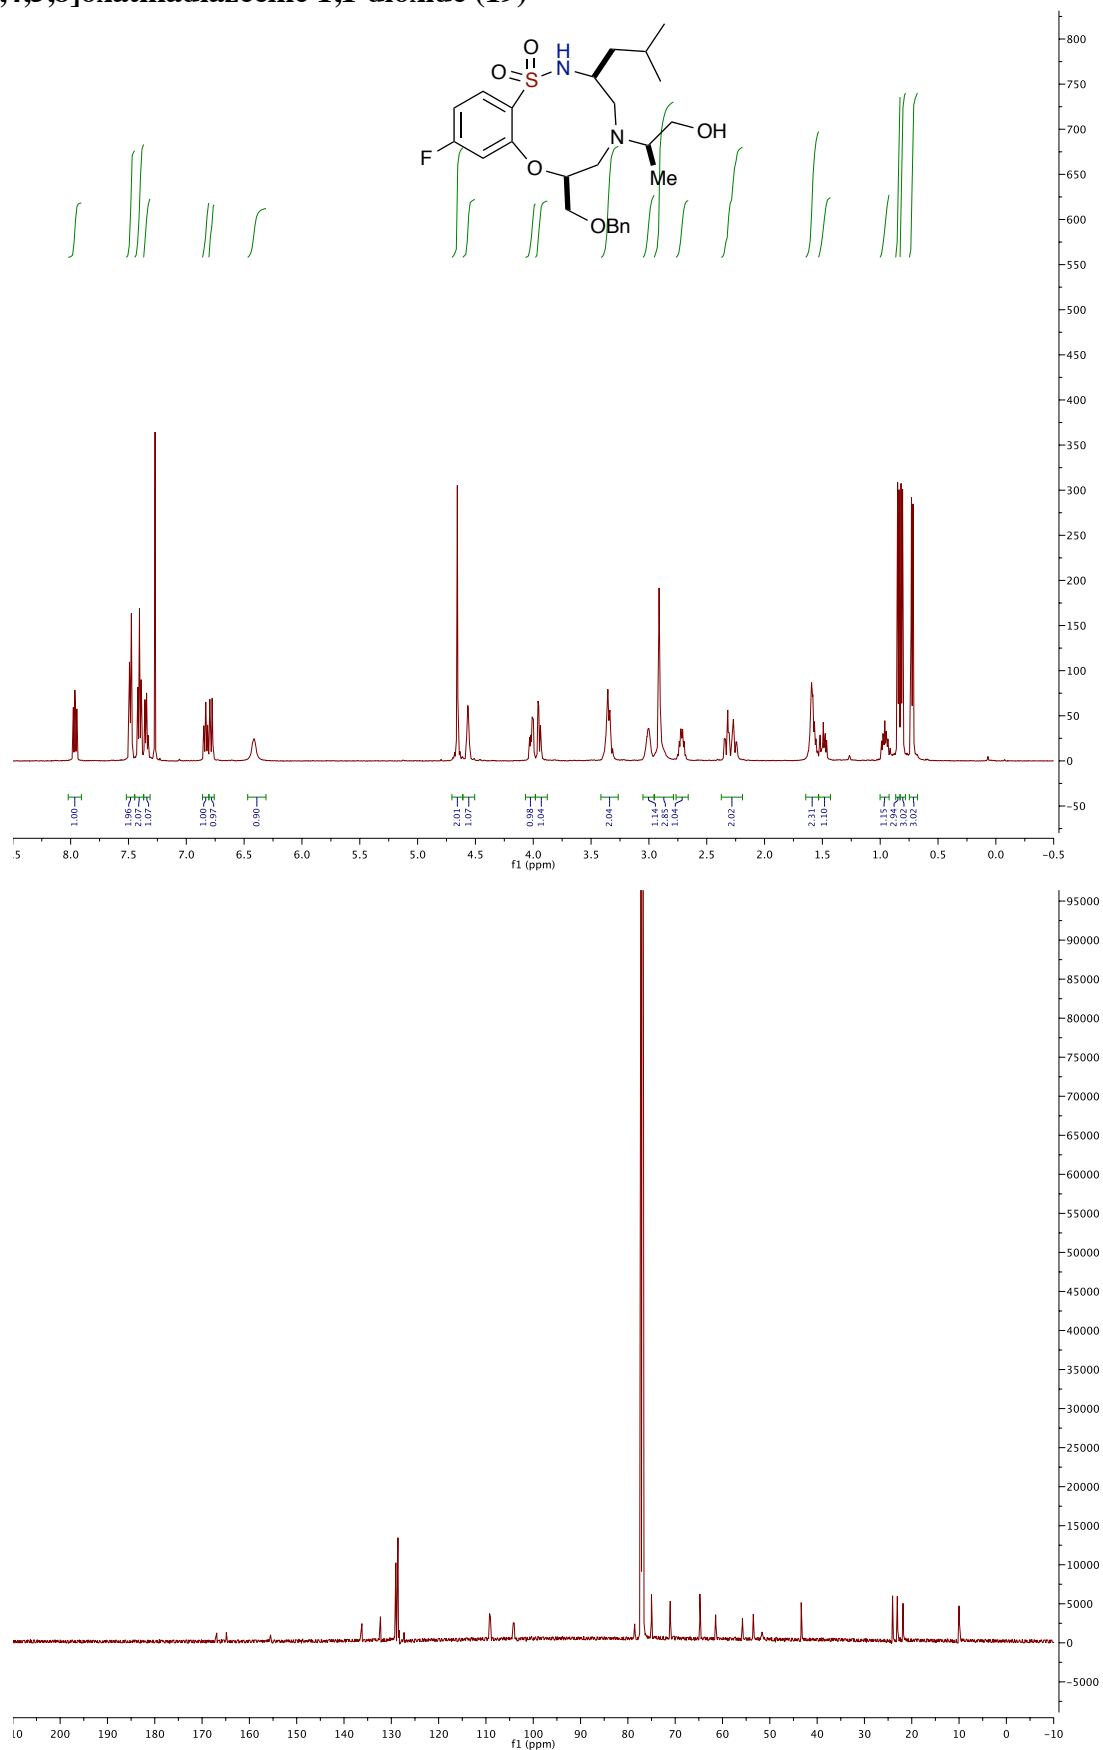

Supplement: jo5b01429_si_001.pdf [file jo5b01429_si_001.pdf]
